# Supplementary material for: Reclassification of TCGA Diffuse Glioma Profiles Linked to Transcriptomic, Epigenetic, Genomic and Clinical Data, According to the 2021 WHO CNS Tumor Classification
Source: MDPI journal article supplement (doi:10.3390/ijms24010157), 2022-12-21
Supplement: s1 [file s1]

**Table S1.** Criteria for reclassification of TCGA diffuse gliomas in accordance with the up-to-date WHO classification of CNS tumors (WHO CNS5)

| TCGA classification        | TCGA grade    | Molecular markers       |                                                |                                                            |                                                  | WHO CNS5 glioma type *                                      | WHO CNS5 grade * | Category | Number of cases | Comments                                                                                                                      |
|----------------------------|---------------|-------------------------|------------------------------------------------|------------------------------------------------------------|--------------------------------------------------|-------------------------------------------------------------|------------------|----------|-----------------|-------------------------------------------------------------------------------------------------------------------------------|
| Oligodendroglioma<br>N=174 | Grade II      | <i>IDH1/2</i> -mutant   | 1p/19q-codeleted                               | <b>without</b> <i>ATRX</i> mutation                        | <b>without</b> <i>CDKN2A</i> homozygous deletion | Oligodendroglioma, <i>IDH</i> -mutant, and 1p/19q-codeleted | Grade 2          | 1.1      | 62              | -                                                                                                                             |
|                            | Grade III     | <i>IDH1/2</i> -mutant   | 1p/19q-codeleted                               | <b>without</b> <i>ATRX</i> mutation                        | -                                                | Oligodendroglioma, <i>IDH</i> -mutant, and 1p/19q-codeleted | Grade 3          | 1.2      | 53              | -                                                                                                                             |
|                            | Grade II      | <i>IDH1/2</i> -mutant   | 1p/19q-codeleted                               | <b>without</b> <i>ATRX</i> mutation                        | <i>CDKN2A</i> homozygous deletion                | Oligodendroglioma, <i>IDH</i> -mutant, and 1p/19q-codeleted | Grade 3          | 1.3      | 0               | -                                                                                                                             |
|                            | Grade II      | <i>IDH1/2</i> -mutant   | 1p/19q-codeleted                               | <i>ATRX</i> mutation                                       | -                                                | NA                                                          | NA               | 1.4      | 0               | As “oligodendrogliomas, <i>IDH</i> -mutant, and 1p/19q-codeleted” lack <i>ATRX</i> mutation these cases are left unclassified |
|                            | Grade III     | <i>IDH1/2</i> -mutant   | 1p/19q-codeleted                               | <i>ATRX</i> mutation                                       | -                                                | NA                                                          | NA               | 1.5      | 2               |                                                                                                                               |
|                            | Grade II      | <i>IDH1/2</i> -mutant   | 1p/19q-non-codeleted                           | <b>without</b> <i>CDKN2A/B</i> homozygous deletion         | -                                                | Astrocytoma, <i>IDH</i> -mutant                             | Grade 2          | 1.6      | 27              | -                                                                                                                             |
|                            | Grade III     | <i>IDH1/2</i> -mutant   | 1p/19q-non-codeleted                           | <b>without</b> <i>CDKN2A/B</i> homozygous deletion         | -                                                | Astrocytoma, <i>IDH</i> -mutant                             | Grade 3          | 1.7      | 7               | -                                                                                                                             |
|                            | Grade II, III | <i>IDH1/2</i> -mutant   | 1p/19q-non-codeleted                           | <i>CDKN2A/B</i> homozygous deletion                        | -                                                | Astrocytoma, <i>IDH</i> -mutant                             | Grade 4          | 1.8      | 3               | -                                                                                                                             |
|                            | Grade II, III | <i>IDH1/2</i> -mutant   | 1p/19q-non-codeleted                           | <b>unknown</b> <i>CDKN2A/B</i> homozygous deletion status  | -                                                | Astrocytoma, <i>IDH</i> -mutant                             | Grade NA         | 1.9      | 1               | As <i>CDKN2A/B</i> HD status is unknown, the grade cannot be determined                                                       |
|                            | Grade II, III | <i>IDH1/2</i> -wildtype | +7/-10 <b>OR</b> <i>TERT</i> promoter mutation | <b>without</b> H3 p.K28 (K27) and H3 p.G35 (G34) mutations | -                                                | Glioblastoma, <i>IDH</i> -wildtype                          | Grade 4          | 1.10     | 10              | -                                                                                                                             |

| TCGA classification         | TCGA grade    | Molecular markers                            |                                                            |                                                                                                                |   | WHO CNS5 glioma type *                | WHO CNS5 grade * | Category | Number of cases | Comments                                                                                                                                                     |
|-----------------------------|---------------|----------------------------------------------|------------------------------------------------------------|----------------------------------------------------------------------------------------------------------------|---|---------------------------------------|------------------|----------|-----------------|--------------------------------------------------------------------------------------------------------------------------------------------------------------|
|                             |               |                                              | <b>OR</b> <i>EGFR</i> amplification                        |                                                                                                                |   |                                       |                  |          |                 |                                                                                                                                                              |
|                             | Grade II      | <i>IDH1/2</i> -wildtype                      | <b>without</b> H3 p.K28 (K27) and H3 p.G35 (G34) mutations | <b>without or unknown</b> +7/-10 <b>AND</b> <i>TERT</i> promoter mutation <b>AND</b> <i>EGFR</i> amplification | - | NA                                    | NA               | 1.11     | 5               | Molecular features required to classify a tumor as “glioblastoma, IDH-wildtype” are absent or unknown                                                        |
|                             | Grade III     | <i>IDH1/2</i> -wildtype                      | <b>without</b> H3 p.K28 (K27) and H3 p.G35 (G34) mutations | <b>without or unknown</b> +7/-10 <b>AND</b> <i>TERT</i> promoter mutation <b>AND</b> <i>EGFR</i> amplification | - | NA                                    | NA               | 1.12     | 3               |                                                                                                                                                              |
|                             | Grade II, III | <i>IDH1/2</i> -wildtype                      | H3 p.K28 (K27) or H3 p.G35 (G34) mutant                    | -                                                                                                              | - | NA                                    | NA               | 1.13     | 1               | <b>TCGA-HT-7469</b> has a mutation <i>H3-3A</i> p.G35R (G34R). This indicates a pediatric-type high grade glioma (Diffuse hemispheric glioma, H3 G34-mutant) |
|                             | Grade II, III | <b>unknown</b> <i>IDH1/2</i> mutation status | -                                                          | -                                                                                                              | - | NA                                    | NA               | 1.14     | 0               | -                                                                                                                                                            |
| Astrocytoma<br><b>N=169</b> | Grade II      | <i>IDH1/2</i> -mutant                        | 1p/19q- <b>non</b> -codeleted                              | <b>without</b> <i>CDKN2A/B</i> homozygous deletion                                                             | - | <b>Astrocytoma, <i>IDH</i>-mutant</b> | Grade 2          | 2.1      | 43              | -                                                                                                                                                            |
|                             | Grade III     | <i>IDH1/2</i> -mutant                        | 1p/19q- <b>non</b> -codeleted                              | <b>without</b> <i>CDKN2A/B</i> homozygous deletion                                                             | - | <b>Astrocytoma, <i>IDH</i>-mutant</b> | Grade 3          | 2.2      | 63              | -                                                                                                                                                            |
|                             | Grade II, III | <i>IDH1/2</i> -mutant                        | 1p/19q- <b>non</b> -codeleted                              | <i>CDKN2A/B</i> homozygous deletion                                                                            | - | <b>Astrocytoma, <i>IDH</i>-mutant</b> | Grade 4          | 2.3      | 7               | -                                                                                                                                                            |

| TCGA classification | TCGA grade    | Molecular markers            |                                                                                          |                                                                                                                      |                                                  | WHO CNS5 glioma type *                                            | WHO CNS5 grade * | Category | Number of cases | Comments                                                                                                                                                   |
|---------------------|---------------|------------------------------|------------------------------------------------------------------------------------------|----------------------------------------------------------------------------------------------------------------------|--------------------------------------------------|-------------------------------------------------------------------|------------------|----------|-----------------|------------------------------------------------------------------------------------------------------------------------------------------------------------|
|                     | Grade II      | <i>IDH1/2</i> -mutant        | 1p/19q-codeleted                                                                         | <b>without</b> <i>ATRX</i> mutation                                                                                  | <b>without</b> <i>CDKN2A</i> homozygous deletion | <b>Oligodendroglioma, <i>IDH</i>-mutant, and 1p/19q-codeleted</b> | Grade 2          | 2.4      | <b>2</b>        | -                                                                                                                                                          |
|                     | Grade III     | <i>IDH1/2</i> -mutant        | 1p/19q-codeleted                                                                         | <b>without</b> <i>ATRX</i> mutation                                                                                  | -                                                | <b>Oligodendroglioma, <i>IDH</i>-mutant, and 1p/19q-codeleted</b> | Grade 3          | 2.5      | <b>2</b>        | -                                                                                                                                                          |
|                     | Grade II      | <i>IDH1/2</i> -mutant        | 1p/19q-codeleted                                                                         | <b>without</b> <i>ATRX</i> mutation                                                                                  | <i>CDKN2A</i> homozygous deletion                | <b>Oligodendroglioma, <i>IDH</i>-mutant, and 1p/19q-codeleted</b> | Grade 3          | 2.6      | <b>0</b>        | -                                                                                                                                                          |
|                     | Grade II, III | <i>IDH1/2</i> -wildtype      | +7/-10<br><b>OR</b> <i>TERT</i> promoter mutation<br><b>OR</b> <i>EGFR</i> amplification | <b>without</b> H3 p.K28 (K27) and H3 p.G35 (G34) mutations                                                           | -                                                | <b>Glioblastoma, <i>IDH</i>-wildtype</b>                          | Grade 4          | 2.7      | <b>39</b>       | -                                                                                                                                                          |
|                     | Grade II      | <i>IDH1/2</i> -wildtype      | <b>without</b> H3 p.K28 (K27) and H3 p.G35 (G34) mutations                               | <b>without or unknown</b> +7/-10<br><b>AND</b> <i>TERT</i> promoter mutation<br><b>AND</b> <i>EGFR</i> amplification | -                                                | NA                                                                | NA               | 2.8      | <b>6</b>        | Molecular features required to classify a tumor as “glioblastoma, <i>IDH</i> -wildtype” are absent or unknown                                              |
|                     | Grade III     | <i>IDH1/2</i> -wildtype      | <b>without</b> H3 p.K28 (K27) and H3 p.G35 (G34) mutations                               | <b>without or unknown</b> +7/-10<br><b>AND</b> <i>TERT</i> promoter mutation<br><b>AND</b> <i>EGFR</i> amplification | -                                                | NA                                                                | NA               | 2.9      | <b>6</b>        |                                                                                                                                                            |
|                     | Grade II, III | <i>IDH1/2</i> -wildtype      | H3 p.K28 (K27) or H3 p.G35 (G34) mutant                                                  | -                                                                                                                    | -                                                | NA                                                                | NA               | 2.10     | <b>1</b>        | <b>TCGA-TM-A84C</b> has a mutation <i>H3</i> -3A p.K28M (K27M). This indicates a pediatric-type high grade glioma (Diffuse midline glioma, H3 K27–altered) |
|                     | Grade II, III | <b>unknown</b> <i>IDH1/2</i> | -                                                                                        | -                                                                                                                    | -                                                | NA                                                                | NA               | 2.11     | <b>0</b>        | -                                                                                                                                                          |

| TCGA classification       | TCGA grade    | Molecular markers       |                                      |                                                           |                                                  | WHO CNS5 glioma type *                                            | WHO CNS5 grade * | Category | Number of cases | Comments                                                                                                                      |
|---------------------------|---------------|-------------------------|--------------------------------------|-----------------------------------------------------------|--------------------------------------------------|-------------------------------------------------------------------|------------------|----------|-----------------|-------------------------------------------------------------------------------------------------------------------------------|
|                           |               | mutation status         |                                      |                                                           |                                                  |                                                                   |                  |          |                 |                                                                                                                               |
| Oligoastrocytoma<br>N=114 | Grade II      | <i>IDH1/2</i> -mutant   | 1p/19q- <b>non</b> -codeleted        | <b>without</b> <i>CDKN2A/B</i> homozygous deletion        | -                                                | <b>Astrocytoma, <i>IDH</i>-mutant</b>                             | Grade 2          | 3.1      | <b>40</b>       | -                                                                                                                             |
|                           | Grade III     | <i>IDH1/2</i> -mutant   | 1p/19q- <b>non</b> -codeleted        | <b>without</b> <i>CDKN2A/B</i> homozygous deletion        | -                                                | <b>Astrocytoma, <i>IDH</i>-mutant</b>                             | Grade 3          | 3.2      | <b>27</b>       | -                                                                                                                             |
|                           | Grade II, III | <i>IDH1/2</i> -mutant   | 1p/19q- <b>non</b> -codeleted        | <i>CDKN2A/B</i> homozygous deletion                       | -                                                | <b>Astrocytoma, <i>IDH</i>-mutant</b>                             | Grade 4          | 3.3      | <b>1</b>        | -                                                                                                                             |
|                           | Grade II, III | <i>IDH1/2</i> -mutant   | 1p/19q- <b>non</b> -codeleted        | <b>unknown</b> <i>CDKN2A/B</i> homozygous deletion status | -                                                | <b>Astrocytoma, <i>IDH</i>-mutant</b>                             | Grade NA         | 3.4      | <b>1</b>        | As <i>CDKN2A/B</i> HD status is unknown, the grade cannot be determined                                                       |
|                           | Grade II      | <i>IDH1/2</i> -mutant   | 1p/19q-codeleted                     | <b>without</b> <i>ATRX</i> mutation                       | <b>without</b> <i>CDKN2A</i> homozygous deletion | <b>Oligodendroglioma, <i>IDH</i>-mutant, and 1p/19q-codeleted</b> | Grade 2          | 3.5      | <b>16</b>       | -                                                                                                                             |
|                           | Grade III     | <i>IDH1/2</i> -mutant   | 1p/19q-codeleted                     | <b>without</b> <i>ATRX</i> mutation                       | <b>without</b> <i>CDKN2A</i> homozygous deletion | <b>Oligodendroglioma, <i>IDH</i>-mutant, and 1p/19q-codeleted</b> | Grade 3          | 3.6      | <b>13</b>       | -                                                                                                                             |
|                           | Grade II      | <i>IDH1/2</i> -mutant   | 1p/19q-codeleted                     | <b>without</b> <i>ATRX</i> mutation                       | <i>CDKN2A</i> homozygous deletion                | <b>Oligodendroglioma, <i>IDH</i>-mutant, and 1p/19q-codeleted</b> | Grade 3          | 3.7      | <b>0</b>        | -                                                                                                                             |
|                           | Grade II      | <i>IDH1/2</i> -mutant   | 1p/19q-codeleted                     | <i>ATRX</i> mutation                                      | -                                                | NA                                                                | NA               | 3.8      | <b>1</b>        | As “oligodendrogliomas, <i>IDH</i> -mutant, and 1p/19q-codeleted” lack <i>ATRX</i> mutation these cases are left unclassified |
|                           | Grade III     | <i>IDH1/2</i> -mutant   | 1p/19q-codeleted                     | <i>ATRX</i> mutation                                      | -                                                | NA                                                                | NA               | 3.9      | <b>0</b>        |                                                                                                                               |
|                           | Grade II      | <i>IDH1/2</i> -wildtype | <b>without</b> H3 p.K28 (K27) and H3 | <b>without or unknown</b>                                 | -                                                | NA                                                                | NA               | 3.10     | <b>0</b>        | Molecular features required to classify a tumor as “glioblastoma,                                                             |

| TCGA classification   | TCGA grade    | Molecular markers       |                                                                                                                      |                                                                                                                      |   | WHO CNS5 glioma type *                   | WHO CNS5 grade * | Category | Number of cases | Comments                                                                                                                                                                                                                                                                                                                                                            |
|-----------------------|---------------|-------------------------|----------------------------------------------------------------------------------------------------------------------|----------------------------------------------------------------------------------------------------------------------|---|------------------------------------------|------------------|----------|-----------------|---------------------------------------------------------------------------------------------------------------------------------------------------------------------------------------------------------------------------------------------------------------------------------------------------------------------------------------------------------------------|
|                       |               |                         | p.G35 (G34) mutations                                                                                                | +7/-10<br><b>AND</b> <i>TERT</i> promoter mutation<br><b>AND</b> <i>EGFR</i> amplification                           |   |                                          |                  |          |                 | <i>IDH</i> -wildtype" are absent or unknown                                                                                                                                                                                                                                                                                                                         |
|                       | Grade III     | <i>IDH1/2</i> -wildtype | <b>without</b> H3 p.K28 (K27) and H3 p.G35 (G34) mutations                                                           | <b>without or unknown</b> +7/-10<br><b>AND</b> <i>TERT</i> promoter mutation<br><b>AND</b> <i>EGFR</i> amplification | - | NA                                       | NA               | 3.11     | 2               |                                                                                                                                                                                                                                                                                                                                                                     |
|                       | Grade II, III | <i>IDH1/2</i> -wildtype | +7/-10<br><b>OR</b> <i>TERT</i> promoter mutation<br><b>OR</b> <i>EGFR</i> amplification                             | <b>without</b> H3 p.K28 (K27) and H3 p.G35 (G34) mutations                                                           | - | <b>Glioblastoma, <i>IDH</i>-wildtype</b> | Grade 4          | 3.12     | 13              | -                                                                                                                                                                                                                                                                                                                                                                   |
| Glioblastoma<br>N=590 | Grade IV      | <i>IDH1/2</i> -wildtype | +7/-10<br><b>OR</b> <i>TERT</i> promoter mutation<br><b>OR</b> <i>EGFR</i> amplification                             | <b>without</b> H3 p.K28 (K27) and H3 p.G35 (G34) mutations                                                           | - | <b>Glioblastoma, <i>IDH</i>-wildtype</b> | Grade 4          | 4.1      | 300             | -                                                                                                                                                                                                                                                                                                                                                                   |
|                       |               | <i>IDH1/2</i> -wildtype | <b>without or unknown</b> +7/-10<br><b>AND</b> <i>TERT</i> promoter mutation<br><b>AND</b> <i>EGFR</i> amplification | <b>without</b> H3 p.K28 (K27) and H3 p.G35 (G34) mutations                                                           | - | <b>Glioblastoma, <i>IDH</i>-wildtype</b> | Grade 4          | 4.2      | 64              | We accept that there was necrosis and/or MVP in the samples, otherwise they would not fall into the category of "glioblastoma, grade IV". As necrosis or/and MVP are WHO CNS5 criteria sufficient for classifying an <i>IDH</i> -wildtype diffuse glioma as "glioblastoma, <i>IDH</i> -wildtype, grade 4", tumor type was preserved based on histological features. |
|                       |               | <i>IDH1/2</i> -wildtype | H3 p.K28 (K27) or H3                                                                                                 | -                                                                                                                    | - | NA                                       | Grade 4          | 4.3      | 1               | <b>TCGA-06-A5U0</b> has a mutation <i>H3</i> -3A p.G35R (G34R). This indicates a pediatric-type high                                                                                                                                                                                                                                                                |

| TCGA classification | TCGA grade | Molecular markers       |                                                                  |   |   | WHO CNS5 glioma type *                                            | WHO CNS5 grade * | Category | Number of cases | Comments                                                                                                                                                                                                                                                                                                                                                                         |
|---------------------|------------|-------------------------|------------------------------------------------------------------|---|---|-------------------------------------------------------------------|------------------|----------|-----------------|----------------------------------------------------------------------------------------------------------------------------------------------------------------------------------------------------------------------------------------------------------------------------------------------------------------------------------------------------------------------------------|
|                     |            |                         | p.G35 (G34) mutant                                               |   |   |                                                                   |                  |          |                 | grade glioma (Diffuse hemispheric glioma, H3 G34-mutant)                                                                                                                                                                                                                                                                                                                         |
|                     |            | <i>IDH1/2</i> -wildtype | <b>unknown</b> H3 p.K28 (K27) or H3 p.G35 (G34) mutations status | - | - | NA                                                                | Grade 4          | 4.4      | <b>82</b>       | Accordingly to WHO CNS5, Glioblastoma, <i>IDH</i> -wildtype, is a diffuse, astrocytic glioma that is <i>IDH</i> -wildtype and <i>H3</i> -wildtype. As <i>H3</i> mutation status is unknown, diagnosis of a glioblastoma cannot be assigned                                                                                                                                       |
|                     |            | <i>IDH1/2</i> -mutant   | 1p/19q- <b>non</b> -codeleted                                    | - | - | <b>Astrocytoma, <i>IDH</i>-mutant</b>                             | Grade 4          | 4.5      | <b>32</b>       | We accept that there was necrosis and/or MVP in the samples, otherwise they would not fall into the category of “glioblastoma, grade IV”. As necrosis or/and MVP are WHO CNS5 criteria sufficient for classifying an <i>IDH</i> -mutant astrocytic tumor as “astrocytoma, <i>IDH</i> -mutant, grade 4”, tumor grade was preserved based on histological features.                |
|                     |            | <i>IDH1/2</i> -mutant   | 1p/19q-codeleted                                                 | - | - | <b>Oligodendroglioma, <i>IDH</i>-mutant, and 1p/19q-codeleted</b> | Grade 3          | 4.6      | <b>2</b>        | Molecular features ( <i>IDH</i> -mutant, 1p/19q-codeleted) match the diagnosis of “oligodendroglioma, <i>IDH</i> -mutant, and 1p/19q-codeleted”. We accept that there was necrosis and/or MVP in the samples, otherwise they would not fall into the category of “glioblastoma, grade IV”. Necrosis or/and MVP are WHO CNS5 histological criteria for grade 3 oligodendroglioma. |
|                     |            | <i>IDH1/2</i> -mutant   | <b>unknown</b> 1p/19q codeletion status                          | - | - | NA                                                                | NA               | 4.7      | <b>3</b>        | These cases may belong either to “astrocytomas, <i>IDH</i> -mutant, grade 4” or to “oligodendroglioma, <i>IDH</i> -mutant, and 1p/19q-codeleted, grade 3” depending on 1p/19q codeletion status                                                                                                                                                                                  |

| TCGA classification | TCGA grade | Molecular markers                     |   |   |   | WHO CNS5 glioma type * | WHO CNS5 grade * | Category | Number of cases | Comments |
|---------------------|------------|---------------------------------------|---|---|---|------------------------|------------------|----------|-----------------|----------|
|                     |            | unknown <i>IDH1/2</i> mutation status | - | - | - | NA                     | NA               | 4.8      | 106             | -        |
| unknown<br>N=75     | unknown    | -                                     | - | - | - | NA                     | NA               | 5.1      | 75              | -        |

\* If the necessary diagnostic information is lacking or does not allow for a certain WHO diagnosis (e.g., in the case of a mismatch between clinical, histological and/or molecular features) the WHO CNS5 prescribes to use descriptive diagnosis with “NEC” (Not Elsewhere Classified) or “NOS” (Not Otherwise Specified) abbreviations; we combined all such cases under the designation «**NA**».
