# Supplementary material for: Reclassification of TCGA Diffuse Glioma Profiles Linked to Transcriptomic, Epigenetic, Genomic and Clinical Data, According to the 2021 WHO CNS Tumor Classification
Source: Int J Mol Sci. 2022 Dec 21;24(1):157. doi: 10.3390/ijms24010157 (PMC9820617; doi:10.3390/ijms24010157)
Supplement: Supplementary file 1 [file ijms-24-00157-s001.zip]

Archive with 7 entries (7 files):
- ijms-2057006_Table S1.pdf
- ijms-2057006_Table S2.xlsx
- ijms-2057006_Table S3.xlsx
- ijms-2057006_Table S4.xlsx
- ijms-2057006_Table S5.xlsx
- ijms-2057006_Table S6.xlsx
- ijms-2057006_Table S7.xlsx
