# Supplementary material for: Reclassification of TCGA Diffuse Glioma Profiles Linked to Transcriptomic, Epigenetic, Genomic and Clinical Data, According to the 2021 WHO CNS Tumor Classification
Source: Int J Mol Sci. 2022 Dec 21;24(1):157. doi: 10.3390/ijms24010157 (PMC9820617; doi:10.3390/ijms24010157)
Supplement: Supplementary file 1 [file ijms-24-00157-s001.zip › ijms-2057006_Table S2.xlsx]

## Sheet: Table S2
Case_ID	Age (years at diagnosis)	TCGA Histology	TCGA Grade	IDH status	Chr 7 gain/Chr 10 loss	TERT promoter status	ATRX status	EGFR_CNV	CDKN2A_CNV	CDKN2B_CNV	1p/19q codeletion	H3 K27,G34 status	MGMT promoter status	Category (Table S1)	WHO_CNS5_diagnosis
TCGA-02-0001	44	glioblastoma	G4	WT	Gain chr 7 & loss chr 10	unknown	unknown	1	-2	-2	non-codel	unknown	Unmethylated	4.4	NA. Grade NA.
TCGA-02-0003	50	glioblastoma	G4	WT	Gain chr 7 & loss chr 10	unknown	WT	2	0	0	non-codel	WT	Unmethylated	4.1	Glioblastoma, IDH-wildtype. Grade 4.
TCGA-02-0007	40	glioblastoma	G4	WT	No combined CNA	unknown	unknown	1	-1	-1	non-codel	unknown	Unmethylated	4.4	NA. Grade NA.
TCGA-02-0006	56	glioblastoma	G4	WT	Gain chr 7 & loss chr 10	unknown	unknown	1	-1	-1	non-codel	unknown	Unmethylated	4.4	NA. Grade NA.
TCGA-02-0104	29	glioblastoma	G4	WT	No combined CNA	unknown	unknown	0	-2	-2	non-codel	unknown	unknown	4.4	NA. Grade NA.
TCGA-02-0009	61	glioblastoma	G4	WT	Gain chr 7 & loss chr 10	unknown	unknown	2	-2	-2	non-codel	unknown	Unmethylated	4.4	NA. Grade NA.
TCGA-02-0010	20	glioblastoma	G4	Mutant	No combined CNA	unknown	unknown	0	-1	-1	non-codel	unknown	Unmethylated	4.5	Astrocytoma, IDH-mutant. Grade 4.
TCGA-02-0011	18	glioblastoma	G4	WT	No combined CNA	unknown	unknown	0	1	1	non-codel	unknown	Methylated	4.4	NA. Grade NA.
TCGA-02-0014	25	glioblastoma	G4	Mutant	No combined CNA	unknown	unknown	0	-2	-2	non-codel	unknown	Unmethylated	4.5	Astrocytoma, IDH-mutant. Grade 4.
TCGA-02-0015	50	glioblastoma	G4	WT	Gain chr 7 & loss chr 10	unknown	unknown	1	-2	-2	non-codel	unknown	unknown	4.4	NA. Grade NA.
TCGA-02-0016	50	glioblastoma	G4	WT	Gain chr 7 & loss chr 10	unknown	unknown	2	-2	-2	non-codel	unknown	unknown	4.4	NA. Grade NA.
TCGA-02-0021	43	glioblastoma	G4	WT	Gain chr 7 & loss chr 10	unknown	unknown	2	-1	-1	non-codel	unknown	Methylated	4.4	NA. Grade NA.
TCGA-02-0023	38	glioblastoma	G4	WT	Gain chr 7 & loss chr 10	unknown	unknown	2	-2	-2	non-codel	unknown	unknown	4.4	NA. Grade NA.
TCGA-08-0245	31	glioblastoma	G4	WT	No combined CNA	unknown	unknown	1	0	0	non-codel	unknown	unknown	4.4	NA. Grade NA.
TCGA-08-0350	32	glioblastoma	G4	WT	No combined CNA	unknown	unknown	0	0	0	non-codel	unknown	unknown	4.4	NA. Grade NA.
TCGA-02-0026	27	glioblastoma	G4	Mutant	No combined CNA	unknown	unknown	0	0	0	non-codel	unknown	unknown	4.5	Astrocytoma, IDH-mutant. Grade 4.
TCGA-02-0027	33	glioblastoma	G4	WT	Gain chr 7 & loss chr 10	unknown	unknown	1	-2	-2	non-codel	unknown	Unmethylated	4.4	NA. Grade NA.
TCGA-02-0028	39	glioblastoma	G4	Mutant	No combined CNA	unknown	unknown	0	0	0	codel	unknown	Methylated	4.6	Oligodendroglioma, IDH-mutant, 1p/19q-codeleted. Grade 3.
TCGA-02-0033	54	glioblastoma	G4	WT	Gain chr 7 & loss chr 10	unknown	WT	1	0	0	non-codel	WT	Methylated	4.1	Glioblastoma, IDH-wildtype. Grade 4.
TCGA-02-0034	60	glioblastoma	G4	WT	Gain chr 7 & loss chr 10	unknown	unknown	1	-2	-2	non-codel	unknown	Unmethylated	4.4	NA. Grade NA.
TCGA-02-0037	74	glioblastoma	G4	WT	Gain chr 7 & loss chr 10	unknown	unknown	1	-2	-2	non-codel	unknown	Unmethylated	4.4	NA. Grade NA.
TCGA-02-0038	48	glioblastoma	G4	WT	Gain chr 7 & loss chr 10	unknown	unknown	2	-2	-2	non-codel	unknown	Unmethylated	4.4	NA. Grade NA.
TCGA-02-0024	35	glioblastoma	G4	WT	No combined CNA	unknown	unknown	0	-2	-2	non-codel	unknown	Unmethylated	4.4	NA. Grade NA.
TCGA-02-0043	54	glioblastoma	G4	WT	Gain chr 7 & loss chr 10	unknown	unknown	2	-2	-2	non-codel	unknown	Methylated	4.4	NA. Grade NA.
TCGA-02-0046	61	glioblastoma	G4	WT	Gain chr 7 & loss chr 10	unknown	unknown	2	0	0	non-codel	unknown	Methylated	4.4	NA. Grade NA.
TCGA-06-A5U0	21	glioblastoma	G4	WT	No combined CNA	unknown	Mutant	0	-1	-1	non-codel	G34R	Methylated	4.3	NA. Grade NA.
TCGA-02-0048	80	glioblastoma	G4	WT	No combined CNA	unknown	unknown	2	-1	-1	non-codel	unknown	unknown	4.4	NA. Grade NA.
TCGA-02-0051	43	glioblastoma	G4	unknown	No combined CNA	unknown	unknown	1	-2	-2	non-codel	unknown	unknown	4.8	NA. Grade NA.
TCGA-02-0052	49	glioblastoma	G4	WT	Gain chr 7 & loss chr 10	unknown	unknown	1	1	1	non-codel	unknown	Unmethylated	4.4	NA. Grade NA.
TCGA-02-0054	44	glioblastoma	G4	WT	No combined CNA	unknown	unknown	1	-2	-2	non-codel	unknown	Methylated	4.4	NA. Grade NA.
TCGA-HT-8015	21	astrocytoma	G2	WT	No combined CNA	WT	WT	0	0	0	non-codel	WT	Unmethylated	2.8	NA. Grade NA.
TCGA-02-0057	66	glioblastoma	G4	WT	Gain chr 7 & loss chr 10	unknown	unknown	1	-2	-2	non-codel	unknown	Unmethylated	4.4	NA. Grade NA.
TCGA-02-0058	28	glioblastoma	G4	Mutant	No combined CNA	unknown	unknown	0	-1	-1	non-codel	unknown	Methylated	4.5	Astrocytoma, IDH-mutant. Grade 4.
TCGA-02-0059	68	glioblastoma	G4	unknown	Gain chr 7 & loss chr 10	unknown	unknown	1	0	0	non-codel	unknown	unknown	4.8	NA. Grade NA.
TCGA-08-0351	40	glioblastoma	G4	WT	No combined CNA	unknown	unknown	0	0	0	non-codel	unknown	unknown	4.4	NA. Grade NA.
TCGA-02-0064	50	glioblastoma	G4	WT	Gain chr 7 & loss chr 10	unknown	unknown	2	-2	-2	non-codel	unknown	Methylated	4.4	NA. Grade NA.
TCGA-02-0068	57	glioblastoma	G4	WT	No combined CNA	unknown	unknown	2	-2	-2	non-codel	unknown	unknown	4.4	NA. Grade NA.
TCGA-02-0060	66	glioblastoma	G4	WT	No combined CNA	unknown	unknown	0	0	0	non-codel	unknown	Methylated	4.4	NA. Grade NA.
TCGA-02-0070	70	glioblastoma	G4	WT	Gain chr 7 & loss chr 10	unknown	unknown	1	-1	-1	non-codel	unknown	unknown	4.4	NA. Grade NA.
TCGA-02-0071	53	glioblastoma	G4	WT	Gain chr 7 & loss chr 10	unknown	unknown	2	-2	-2	non-codel	unknown	Unmethylated	4.4	NA. Grade NA.
TCGA-02-0074	68	glioblastoma	G4	WT	Gain chr 7 & loss chr 10	unknown	unknown	1	1	1	non-codel	unknown	Unmethylated	4.4	NA. Grade NA.
TCGA-02-0075	63	glioblastoma	G4	WT	Gain chr 7 & loss chr 10	unknown	unknown	1	0	0	non-codel	unknown	Methylated	4.4	NA. Grade NA.
TCGA-02-0079	57	glioblastoma	G4	WT	Gain chr 7 & loss chr 10	unknown	unknown	1	0	0	non-codel	unknown	unknown	4.4	NA. Grade NA.
TCGA-02-0080	28	glioblastoma	G4	Mutant	No combined CNA	unknown	unknown	0	-1	-1	non-codel	unknown	Methylated	4.5	Astrocytoma, IDH-mutant. Grade 4.
TCGA-02-0083	59	glioblastoma	G4	WT	No combined CNA	unknown	unknown	2	-1	-1	non-codel	unknown	Methylated	4.4	NA. Grade NA.
TCGA-02-0084	36	glioblastoma	G4	Mutant	No combined CNA	unknown	unknown	0	0	0	non-codel	unknown	unknown	4.5	Astrocytoma, IDH-mutant. Grade 4.
TCGA-02-0085	63	glioblastoma	G4	WT	Gain chr 7 & loss chr 10	unknown	unknown	1	-2	-2	non-codel	unknown	Methylated	4.4	NA. Grade NA.
TCGA-02-0086	45	glioblastoma	G4	WT	Gain chr 7 & loss chr 10	unknown	unknown	1	-2	-2	non-codel	unknown	Unmethylated	4.4	NA. Grade NA.
TCGA-02-0087	27	glioblastoma	G4	unknown	No combined CNA	unknown	unknown	1	0	0	non-codel	unknown	unknown	4.8	NA. Grade NA.
TCGA-02-0089	52	glioblastoma	G4	WT	Gain chr 7 & loss chr 10	unknown	unknown	2	-2	-1	non-codel	unknown	Unmethylated	4.4	NA. Grade NA.
TCGA-02-0099	46	glioblastoma	G4	WT	Gain chr 7 & loss chr 10	unknown	unknown	1	-1	-1	non-codel	unknown	Methylated	4.4	NA. Grade NA.
TCGA-02-0102	42	glioblastoma	G4	WT	Gain chr 7 & loss chr 10	unknown	unknown	2	0	0	non-codel	unknown	Unmethylated	4.4	NA. Grade NA.
TCGA-02-0069	31	glioblastoma	G4	WT	No combined CNA	unknown	unknown	1	1	1	non-codel	unknown	Methylated	4.4	NA. Grade NA.
TCGA-02-0106	54	glioblastoma	G4	unknown	Gain chr 7 & loss chr 10	unknown	unknown	2	-2	-2	non-codel	unknown	unknown	4.8	NA. Grade NA.
TCGA-02-0025	47	glioblastoma	G4	WT	No combined CNA	unknown	unknown	1	1	1	non-codel	unknown	unknown	4.4	NA. Grade NA.
TCGA-02-0111	56	glioblastoma	G4	unknown	No combined CNA	unknown	unknown	1	-2	-2	non-codel	unknown	unknown	4.8	NA. Grade NA.
TCGA-02-0107	56	glioblastoma	G4	WT	No combined CNA	unknown	unknown	1	-1	-1	non-codel	unknown	Unmethylated	4.4	NA. Grade NA.
TCGA-02-0114	37	glioblastoma	G4	Mutant	No combined CNA	unknown	unknown	0	-1	-1	non-codel	unknown	Methylated	4.5	Astrocytoma, IDH-mutant. Grade 4.
TCGA-02-0113	43	glioblastoma	G4	WT	No combined CNA	unknown	unknown	1	0	0	non-codel	unknown	Unmethylated	4.4	NA. Grade NA.
TCGA-02-0116	51	glioblastoma	G4	WT	Gain chr 7 & loss chr 10	unknown	unknown	2	-2	-2	non-codel	unknown	Unmethylated	4.4	NA. Grade NA.
TCGA-02-0250		unknown	unknown	unknown	unknown	unknown	unknown	unknown	unknown	unknown	unknown	unknown	unknown	5.1	NA. Grade NA.
TCGA-02-0258	36	glioblastoma	G4	unknown	No combined CNA	unknown	unknown	0	-2	-2	non-codel	unknown	unknown	4.8	NA. Grade NA.
TCGA-02-0260	54	glioblastoma	G4	unknown	Gain chr 7 & loss chr 10	unknown	unknown	2	-2	-2	non-codel	unknown	unknown	4.8	NA. Grade NA.
TCGA-02-0266	14	glioblastoma	G4	unknown	No combined CNA	unknown	unknown	1	-1	-1	non-codel	unknown	unknown	4.8	NA. Grade NA.
TCGA-02-0269	68	glioblastoma	G4	unknown	Gain chr 7 & loss chr 10	unknown	unknown	2	-2	-2	non-codel	unknown	unknown	4.8	NA. Grade NA.
TCGA-02-0271	26	glioblastoma	G4	unknown	No combined CNA	unknown	unknown	1	0	0	non-codel	unknown	unknown	4.8	NA. Grade NA.
TCGA-02-0281	78	glioblastoma	G4	unknown	Gain chr 7 & loss chr 10	unknown	unknown	1	-2	-2	non-codel	unknown	unknown	4.8	NA. Grade NA.
TCGA-02-0285	50	glioblastoma	G4	unknown	Gain chr 7 & loss chr 10	unknown	unknown	1	-2	-2	non-codel	unknown	unknown	4.8	NA. Grade NA.
TCGA-02-0289	57	glioblastoma	G4	unknown	Gain chr 7 & loss chr 10	unknown	unknown	2	-2	-2	non-codel	unknown	unknown	4.8	NA. Grade NA.
TCGA-02-0290	49	glioblastoma	G4	unknown	Gain chr 7 & loss chr 10	unknown	unknown	2	-2	-2	non-codel	unknown	unknown	4.8	NA. Grade NA.
TCGA-02-0317	40	glioblastoma	G4	unknown	Gain chr 7 & loss chr 10	unknown	unknown	2	-2	-2	non-codel	unknown	unknown	4.8	NA. Grade NA.
TCGA-02-0321	74	glioblastoma	G4	unknown	Gain chr 7 & loss chr 10	unknown	unknown	1	-1	-1	non-codel	unknown	unknown	4.8	NA. Grade NA.
TCGA-02-0324	69	glioblastoma	G4	unknown	Gain chr 7 & loss chr 10	unknown	unknown	1	-2	-2	non-codel	unknown	unknown	4.8	NA. Grade NA.
TCGA-02-0325	61	glioblastoma	G4	unknown	Gain chr 7 & loss chr 10	unknown	unknown	1	-2	-2	non-codel	unknown	unknown	4.8	NA. Grade NA.
TCGA-02-0326	82	glioblastoma	G4	unknown	No combined CNA	unknown	unknown	1	-2	-2	non-codel	unknown	unknown	4.8	NA. Grade NA.
TCGA-02-0329		unknown	unknown	unknown	unknown	unknown	unknown	unknown	unknown	unknown	unknown	unknown	unknown	5.1	NA. Grade NA.
TCGA-02-0330	51	glioblastoma	G4	unknown	Gain chr 7 & loss chr 10	unknown	unknown	1	-1	-1	non-codel	unknown	unknown	4.8	NA. Grade NA.
TCGA-02-0332	46	glioblastoma	G4	unknown	Gain chr 7 & loss chr 10	unknown	unknown	1	1	1	non-codel	unknown	unknown	4.8	NA. Grade NA.
TCGA-02-0333	77	glioblastoma	G4	unknown	No combined CNA	unknown	unknown	2	-2	-2	non-codel	unknown	unknown	4.8	NA. Grade NA.
TCGA-02-0336		unknown	unknown	unknown	unknown	unknown	unknown	unknown	unknown	unknown	unknown	unknown	unknown	5.1	NA. Grade NA.
TCGA-02-0337	48	glioblastoma	G4	unknown	Gain chr 7 & loss chr 10	unknown	unknown	1	0	0	non-codel	unknown	unknown	4.8	NA. Grade NA.
TCGA-02-0338	41	glioblastoma	G4	unknown	No combined CNA	unknown	unknown	0	0	0	non-codel	unknown	unknown	4.8	NA. Grade NA.
TCGA-02-0339	67	glioblastoma	G4	unknown	No combined CNA	unknown	unknown	0	-1	-1	non-codel	unknown	unknown	4.8	NA. Grade NA.
TCGA-02-0422	50	glioblastoma	G4	unknown	No combined CNA	unknown	unknown	2	-2	-2	non-codel	unknown	unknown	4.8	NA. Grade NA.
TCGA-02-0430	67	glioblastoma	G4	unknown	Gain chr 7 & loss chr 10	unknown	unknown	2	-2	-2	non-codel	unknown	unknown	4.8	NA. Grade NA.
TCGA-02-0432	36	glioblastoma	G4	unknown	No combined CNA	unknown	unknown	0	-1	-1	non-codel	unknown	unknown	4.8	NA. Grade NA.
TCGA-02-0439	70	glioblastoma	G4	unknown	unknown	unknown	unknown	unknown	unknown	unknown	unknown	unknown	unknown	4.8	NA. Grade NA.
TCGA-02-0440	62	glioblastoma	G4	unknown	Gain chr 7 & loss chr 10	unknown	unknown	1	-2	-2	non-codel	unknown	unknown	4.8	NA. Grade NA.
TCGA-02-0446	61	glioblastoma	G4	unknown	Gain chr 7 & loss chr 10	unknown	unknown	1	-2	-2	non-codel	unknown	unknown	4.8	NA. Grade NA.
TCGA-02-0451	62	glioblastoma	G4	unknown	Gain chr 7 & loss chr 10	unknown	unknown	2	-2	-2	non-codel	unknown	unknown	4.8	NA. Grade NA.
TCGA-02-0456	67	glioblastoma	G4	unknown	Gain chr 7 & loss chr 10	unknown	unknown	1	1	1	non-codel	unknown	unknown	4.8	NA. Grade NA.
TCGA-02-2466	61	glioblastoma	G4	WT	Gain chr 7 & loss chr 10	unknown	unknown	1	-1	-1	non-codel	WT	Unmethylated	4.1	Glioblastoma, IDH-wildtype. Grade 4.
TCGA-02-2470	57	glioblastoma	G4	WT	Gain chr 7 & loss chr 10	unknown	WT	1	-2	-2	non-codel	WT	Unmethylated	4.1	Glioblastoma, IDH-wildtype. Grade 4.
TCGA-02-2483	43	glioblastoma	G4	Mutant	No combined CNA	WT	Mutant	0	-2	-2	non-codel	WT	Methylated	4.5	Astrocytoma, IDH-mutant. Grade 4.
TCGA-02-2485	53	glioblastoma	G4	WT	Gain chr 7 & loss chr 10	Mutant	WT	1	0	0	non-codel	WT	Unmethylated	4.1	Glioblastoma, IDH-wildtype. Grade 4.
TCGA-02-2486	64	glioblastoma	G4	WT	Gain chr 7 & loss chr 10	unknown	WT	1	-2	-2	non-codel	WT	Unmethylated	4.1	Glioblastoma, IDH-wildtype. Grade 4.
TCGA-P5-A5EY	21	astrocytoma	G2	WT	No combined CNA	WT	WT	0	0	0	non-codel	WT	Unmethylated	2.8	NA. Grade NA.
TCGA-06-0121		unknown	unknown	unknown	No combined CNA	unknown	unknown	1	0	0	non-codel	unknown	Methylated	5.1	NA. Grade NA.
TCGA-06-0122	84	glioblastoma	G4	WT	Gain chr 7 & loss chr 10	unknown	WT	2	-2	-2	non-codel	WT	Unmethylated	4.1	Glioblastoma, IDH-wildtype. Grade 4.
TCGA-06-0124	67	glioblastoma	G4	WT	Gain chr 7 & loss chr 10	Mutant	WT	2	-2	-2	non-codel	WT	Methylated	4.1	Glioblastoma, IDH-wildtype. Grade 4.
TCGA-06-0125	63	glioblastoma	G4	WT	No combined CNA	Mutant	WT	2	-2	-2	non-codel	WT	Methylated	4.1	Glioblastoma, IDH-wildtype. Grade 4.
TCGA-06-0126	86	glioblastoma	G4	WT	Gain chr 7 & loss chr 10	unknown	WT	2	-2	-2	non-codel	WT	Unmethylated	4.1	Glioblastoma, IDH-wildtype. Grade 4.
TCGA-06-0127	67	glioblastoma	G4	WT	No combined CNA	unknown	unknown	2	-1	-1	non-codel	unknown	unknown	4.4	NA. Grade NA.
TCGA-06-0128	66	glioblastoma	G4	Mutant	No combined CNA	Mutant	WT	1	-1	-1	non-codel	WT	Methylated	4.5	Astrocytoma, IDH-mutant. Grade 4.
TCGA-06-0129	30	glioblastoma	G4	Mutant	No combined CNA	unknown	Mutant	0	0	0	non-codel	WT	Methylated	4.5	Astrocytoma, IDH-mutant. Grade 4.
TCGA-06-2566	23	glioblastoma	G4	WT	No combined CNA	unknown	unknown	0	-2	-2	non-codel	WT	Unmethylated	4.2	Glioblastoma, IDH-wildtype. Grade 4.
TCGA-06-0131		unknown	unknown	unknown	unknown	unknown	unknown	unknown	unknown	unknown	unknown	unknown	unknown	5.1	NA. Grade NA.
TCGA-06-0132	49	glioblastoma	G4	WT	No combined CNA	unknown	WT	2	-1	-1	non-codel	WT	unknown	4.1	Glioblastoma, IDH-wildtype. Grade 4.
TCGA-06-0133	64	glioblastoma	G4	WT	Gain chr 7 & loss chr 10	unknown	unknown	2	-2	-2	non-codel	unknown	Unmethylated	4.4	NA. Grade NA.
TCGA-06-0137	63	glioblastoma	G4	WT	Gain chr 7 & loss chr 10	unknown	WT	2	-2	-2	non-codel	WT	Unmethylated	4.1	Glioblastoma, IDH-wildtype. Grade 4.
TCGA-06-0138	43	glioblastoma	G4	WT	Gain chr 7 & loss chr 10	unknown	unknown	2	0	0	non-codel	WT	unknown	4.1	Glioblastoma, IDH-wildtype. Grade 4.
TCGA-06-1802	61	glioblastoma	G4	WT (maf)	Gain chr 7 & loss chr 10	unknown	unknown	1	-1	-1	non-codel	WT	Methylated	4.1	Glioblastoma, IDH-wildtype. Grade 4.
TCGA-06-0140	86	glioblastoma	G4	WT	Gain chr 7 & loss chr 10	unknown	WT	1	0	0	non-codel	WT	Unmethylated	4.1	Glioblastoma, IDH-wildtype. Grade 4.
TCGA-FG-8181	23	oligoastrocytoma	G3	WT	No combined CNA	WT	WT	0	0	0	non-codel	WT	Unmethylated	3.11	NA. Grade NA.
TCGA-06-0142	81	glioblastoma	G4	WT	No combined CNA	unknown	WT	2	-2	-2	non-codel	WT	Unmethylated	4.1	Glioblastoma, IDH-wildtype. Grade 4.
TCGA-06-0143	58	glioblastoma	G4	WT	No combined CNA	unknown	unknown	2	-2	-2	non-codel	unknown	Unmethylated	4.4	NA. Grade NA.
TCGA-06-0145	53	glioblastoma	G4	WT	Gain chr 7 & loss chr 10	unknown	WT	2	-2	-2	non-codel	WT	Methylated	4.1	Glioblastoma, IDH-wildtype. Grade 4.
TCGA-06-0146	33	glioblastoma	G4	unknown	No combined CNA	unknown	unknown	0	1	1	non-codel	unknown	unknown	4.8	NA. Grade NA.
TCGA-02-0039	54	glioblastoma	G4	WT	No combined CNA	unknown	unknown	0	0	0	non-codel	unknown	unknown	4.4	NA. Grade NA.
TCGA-06-0148	76	glioblastoma	G4	WT	No combined CNA	unknown	unknown	2	-2	-2	non-codel	unknown	Unmethylated	4.4	NA. Grade NA.
TCGA-06-0149	74	glioblastoma	G4	unknown	Gain chr 7 & loss chr 10	unknown	unknown	1	0	0	non-codel	unknown	unknown	4.8	NA. Grade NA.
TCGA-06-0150	45	glioblastoma	G4	WT	Gain chr 7 & loss chr 10	unknown	unknown	2	-2	-2	non-codel	unknown	unknown	4.4	NA. Grade NA.
TCGA-06-0151	32	glioblastoma	G4	Mutant	Gain chr 7 & loss chr 10	unknown	WT	1	-2	-2	non-codel	WT	unknown	4.5	Astrocytoma, IDH-mutant. Grade 4.
TCGA-06-0152	68	glioblastoma	G4	WT	Gain chr 7 & loss chr 10	unknown	WT	2	0	0	non-codel	WT	unknown	4.1	Glioblastoma, IDH-wildtype. Grade 4.
TCGA-06-0154	54	glioblastoma	G4	WT	Gain chr 7 & loss chr 10	unknown	WT	2	-2	-2	non-codel	WT	unknown	4.1	Glioblastoma, IDH-wildtype. Grade 4.
TCGA-06-0155	61	glioblastoma	G4	WT	Gain chr 7 & loss chr 10	unknown	WT	2	-2	-2	non-codel	WT	Unmethylated	4.1	Glioblastoma, IDH-wildtype. Grade 4.
TCGA-06-0156	57	glioblastoma	G4	Mutant	unknown	unknown	unknown	unknown	unknown	unknown	unknown	WT	unknown	4.7	NA. Grade NA.
TCGA-06-0157	63	glioblastoma	G4	WT	Gain chr 7 & loss chr 10	Mutant	WT	2	0	0	non-codel	WT	unknown	4.1	Glioblastoma, IDH-wildtype. Grade 4.
TCGA-06-0158	73	glioblastoma	G4	WT	No combined CNA	unknown	WT	2	-2	-2	non-codel	WT	unknown	4.1	Glioblastoma, IDH-wildtype. Grade 4.
TCGA-06-0159	74	glioblastoma	G4	WT	Gain chr 7 & loss chr 10	unknown	unknown	1	0	0	non-codel	unknown	unknown	4.4	NA. Grade NA.
TCGA-02-0115	52	glioblastoma	G4	WT	No combined CNA	unknown	unknown	1	-2	-2	non-codel	unknown	Methylated	4.4	NA. Grade NA.
TCGA-06-0162	47	glioblastoma	G4	unknown	No combined CNA	unknown	unknown	2	-1	-1	non-codel	unknown	unknown	4.8	NA. Grade NA.
TCGA-06-0164	47	glioblastoma	G4	unknown	Gain chr 7 & loss chr 10	unknown	unknown	1	-2	-2	non-codel	unknown	unknown	4.8	NA. Grade NA.
TCGA-06-2569	24	glioblastoma	G4	WT	No combined CNA	unknown	WT	0	-1	-1	non-codel	WT	Unmethylated	4.2	Glioblastoma, IDH-wildtype. Grade 4.
TCGA-06-0166	51	glioblastoma	G4	WT	Gain chr 7 & loss chr 10	unknown	WT	1	-2	-2	non-codel	WT	unknown	4.1	Glioblastoma, IDH-wildtype. Grade 4.
TCGA-12-0773	24	glioblastoma	G4	WT	No combined CNA	unknown	unknown	1	0	0	non-codel	WT	unknown	4.2	Glioblastoma, IDH-wildtype. Grade 4.
TCGA-06-0168	59	glioblastoma	G4	WT	Gain chr 7 & loss chr 10	unknown	WT	1	0	0	non-codel	WT	unknown	4.1	Glioblastoma, IDH-wildtype. Grade 4.
TCGA-06-0169	68	glioblastoma	G4	WT	Gain chr 7 & loss chr 10	unknown	WT	2	-2	-2	non-codel	WT	Unmethylated	4.1	Glioblastoma, IDH-wildtype. Grade 4.
TCGA-06-0171	65	glioblastoma	G4	WT	Gain chr 7 & loss chr 10	Mutant	WT	1	-2	-2	non-codel	WT	unknown	4.1	Glioblastoma, IDH-wildtype. Grade 4.
TCGA-06-0173	72	glioblastoma	G4	WT	Gain chr 7 & loss chr 10	unknown	WT	2	-1	-1	non-codel	WT	unknown	4.1	Glioblastoma, IDH-wildtype. Grade 4.
TCGA-06-0174	54	glioblastoma	G4	WT	Gain chr 7 & loss chr 10	unknown	WT	2	0	0	non-codel	WT	unknown	4.1	Glioblastoma, IDH-wildtype. Grade 4.
TCGA-06-0175	69	glioblastoma	G4	unknown	Gain chr 7 & loss chr 10	unknown	unknown	1	-2	-2	non-codel	unknown	unknown	4.8	NA. Grade NA.
TCGA-DU-6404	24	oligodendroglioma	G3	WT	No combined CNA	WT	WT	1	0	0	non-codel	WT	Unmethylated	1.12	NA. Grade NA.
TCGA-06-0177	64	glioblastoma	G4	unknown	Gain chr 7 & loss chr 10	unknown	unknown	1	-1	-1	non-codel	unknown	unknown	4.8	NA. Grade NA.
TCGA-06-0178	38	glioblastoma	G4	Mutant	No combined CNA	unknown	WT	0	0	0	non-codel	WT	unknown	4.5	Astrocytoma, IDH-mutant. Grade 4.
TCGA-06-0179	64	glioblastoma	G4	unknown	Gain chr 7 & loss chr 10	unknown	unknown	2	-2	-2	non-codel	unknown	unknown	4.8	NA. Grade NA.
TCGA-06-0182	76	glioblastoma	G4	unknown	Gain chr 7 & loss chr 10	unknown	unknown	2	0	0	non-codel	unknown	unknown	4.8	NA. Grade NA.
TCGA-06-0184	63	glioblastoma	G4	WT	Gain chr 7 & loss chr 10	unknown	WT	2	0	0	non-codel	WT	unknown	4.1	Glioblastoma, IDH-wildtype. Grade 4.
TCGA-06-0185	54	glioblastoma	G4	WT	Gain chr 7 & loss chr 10	unknown	WT	2	-2	-2	non-codel	WT	unknown	4.1	Glioblastoma, IDH-wildtype. Grade 4.
TCGA-06-0187	69	glioblastoma	G4	WT	No combined CNA	unknown	unknown	2	-2	-2	non-codel	WT	unknown	4.1	Glioblastoma, IDH-wildtype. Grade 4.
TCGA-06-0188	71	glioblastoma	G4	WT	Gain chr 7 & loss chr 10	unknown	WT	1	-2	-2	non-codel	WT	unknown	4.1	Glioblastoma, IDH-wildtype. Grade 4.
TCGA-06-0189	55	glioblastoma	G4	WT	No combined CNA	unknown	WT	2	0	0	non-codel	WT	unknown	4.1	Glioblastoma, IDH-wildtype. Grade 4.
TCGA-06-0190	62	glioblastoma	G4	WT	Gain chr 7 & loss chr 10	Mutant	WT	1	-2	-2	non-codel	WT	unknown	4.1	Glioblastoma, IDH-wildtype. Grade 4.
TCGA-06-0192	58	glioblastoma	G4	WT	Gain chr 7 & loss chr 10	unknown	WT	1	-2	-2	non-codel	WT	unknown	4.1	Glioblastoma, IDH-wildtype. Grade 4.
TCGA-06-0194	37	glioblastoma	G4	unknown	Gain chr 7 & loss chr 10	unknown	unknown	2	-2	-2	non-codel	unknown	unknown	4.8	NA. Grade NA.
TCGA-06-0195	63	glioblastoma	G4	WT	Gain chr 7 & loss chr 10	unknown	WT	1	1	1	non-codel	WT	unknown	4.1	Glioblastoma, IDH-wildtype. Grade 4.
TCGA-06-0197	65	glioblastoma	G4	WT	Gain chr 7 & loss chr 10	unknown	unknown	1	0	0	non-codel	unknown	unknown	4.4	NA. Grade NA.
TCGA-06-0201	51	glioblastoma	G4	WT	Gain chr 7 & loss chr 10	unknown	unknown	1	-2	-2	non-codel	unknown	unknown	4.4	NA. Grade NA.
TCGA-06-0206	40	glioblastoma	G4	WT	Gain chr 7 & loss chr 10	unknown	unknown	1	0	0	non-codel	unknown	unknown	4.4	NA. Grade NA.
TCGA-06-0208	52	glioblastoma	G4	WT	Gain chr 7 & loss chr 10	unknown	unknown	2	-2	-2	non-codel	unknown	unknown	4.4	NA. Grade NA.
TCGA-06-0209	76	glioblastoma	G4	WT	Gain chr 7 & loss chr 10	unknown	WT	2	-1	-1	non-codel	WT	unknown	4.1	Glioblastoma, IDH-wildtype. Grade 4.
TCGA-06-0210	72	glioblastoma	G4	WT	Gain chr 7 & loss chr 10	Mutant	WT	1	-2	-2	non-codel	WT	unknown	4.1	Glioblastoma, IDH-wildtype. Grade 4.
TCGA-06-0211	47	glioblastoma	G4	WT	Gain chr 7 & loss chr 10	Mutant	WT	2	-2	-2	non-codel	WT	unknown	4.1	Glioblastoma, IDH-wildtype. Grade 4.
TCGA-HT-7857	24	astrocytoma	G3	WT	No combined CNA	WT	Mutant	0	-2	-2	non-codel	WT	Unmethylated	2.9	NA. Grade NA.
TCGA-06-0214	66	glioblastoma	G4	WT	Gain chr 7 & loss chr 10	Mutant	WT	2	-1	-1	non-codel	WT	unknown	4.1	Glioblastoma, IDH-wildtype. Grade 4.
TCGA-06-0216	61	glioblastoma	G4	WT	Gain chr 7 & loss chr 10	unknown	WT	2	-2	-2	non-codel	WT	unknown	4.1	Glioblastoma, IDH-wildtype. Grade 4.
TCGA-06-0219	67	glioblastoma	G4	WT	No combined CNA	unknown	WT	2	-2	-2	non-codel	WT	unknown	4.1	Glioblastoma, IDH-wildtype. Grade 4.
TCGA-06-0221	31	glioblastoma	G4	Mutant	No combined CNA	WT	Mutant	-1	-1	-1	non-codel	WT	unknown	4.5	Astrocytoma, IDH-mutant. Grade 4.
TCGA-06-0237	75	glioblastoma	G4	WT	Gain chr 7 & loss chr 10	unknown	WT	2	-1	-1	non-codel	WT	unknown	4.1	Glioblastoma, IDH-wildtype. Grade 4.
TCGA-06-0238	46	glioblastoma	G4	WT	Gain chr 7 & loss chr 10	unknown	WT	1	0	0	non-codel	WT	unknown	4.1	Glioblastoma, IDH-wildtype. Grade 4.
TCGA-06-0240	57	glioblastoma	G4	WT	No combined CNA	unknown	WT	2	0	0	non-codel	WT	unknown	4.1	Glioblastoma, IDH-wildtype. Grade 4.
TCGA-06-0241	65	glioblastoma	G4	WT	Gain chr 7 & loss chr 10	unknown	WT	1	-2	-2	non-codel	WT	unknown	4.1	Glioblastoma, IDH-wildtype. Grade 4.
TCGA-06-0394	51	glioblastoma	G4	unknown	Gain chr 7 & loss chr 10	unknown	unknown	1	-2	-2	non-codel	unknown	unknown	4.8	NA. Grade NA.
TCGA-06-0397	57	glioblastoma	G4	unknown	No combined CNA	unknown	unknown	1	-2	-2	non-codel	unknown	unknown	4.8	NA. Grade NA.
TCGA-06-0402	71	glioblastoma	G4	unknown	Gain chr 7 & loss chr 10	unknown	unknown	2	0	0	non-codel	unknown	unknown	4.8	NA. Grade NA.
TCGA-06-0409	43	glioblastoma	G4	unknown	Gain chr 7 & loss chr 10	unknown	unknown	2	-1	-1	non-codel	unknown	unknown	4.8	NA. Grade NA.
TCGA-06-0410	76	glioblastoma	G4	unknown	No combined CNA	unknown	unknown	-1	-2	-2	non-codel	unknown	unknown	4.8	NA. Grade NA.
TCGA-06-0412	56	glioblastoma	G4	unknown	Gain chr 7 & loss chr 10	unknown	unknown	2	-2	-2	non-codel	unknown	unknown	4.8	NA. Grade NA.
TCGA-06-0413	77	glioblastoma	G4	unknown	No combined CNA	unknown	unknown	1	-2	-2	non-codel	unknown	unknown	4.8	NA. Grade NA.
TCGA-06-0414	63	glioblastoma	G4	unknown	No combined CNA	unknown	unknown	1	1	1	non-codel	unknown	unknown	4.8	NA. Grade NA.
TCGA-06-0644	71	glioblastoma	G4	WT	Gain chr 7 & loss chr 10	unknown	WT	1	-2	-2	non-codel	WT	unknown	4.1	Glioblastoma, IDH-wildtype. Grade 4.
TCGA-06-0645	55	glioblastoma	G4	WT	Gain chr 7 & loss chr 10	unknown	WT	2	-1	-1	non-codel	WT	unknown	4.1	Glioblastoma, IDH-wildtype. Grade 4.
TCGA-06-0646	60	glioblastoma	G4	WT	Gain chr 7 & loss chr 10	unknown	WT	2	-2	-2	non-codel	WT	unknown	4.1	Glioblastoma, IDH-wildtype. Grade 4.
TCGA-06-0648	77	glioblastoma	G4	WT	Gain chr 7 & loss chr 10	unknown	WT	1	-2	-2	non-codel	WT	unknown	4.1	Glioblastoma, IDH-wildtype. Grade 4.
TCGA-06-0649	73	glioblastoma	G4	WT	Gain chr 7 & loss chr 10	unknown	WT	1	-2	-2	non-codel	WT	unknown	4.1	Glioblastoma, IDH-wildtype. Grade 4.
TCGA-06-0650	39	glioblastoma	G4	WT	No combined CNA	unknown	WT	2	-2	-2	non-codel	WT	Unmethylated	4.1	Glioblastoma, IDH-wildtype. Grade 4.
TCGA-06-0686	53	glioblastoma	G4	WT	Gain chr 7 & loss chr 10	Mutant	WT	2	0	0	non-codel	WT	unknown	4.1	Glioblastoma, IDH-wildtype. Grade 4.
TCGA-06-0743	69	glioblastoma	G4	WT	Gain chr 7 & loss chr 10	unknown	WT	2	-2	-2	non-codel	WT	unknown	4.1	Glioblastoma, IDH-wildtype. Grade 4.
TCGA-06-0744	66	glioblastoma	G4	WT	Gain chr 7 & loss chr 10	Mutant	WT	2	-1	-1	non-codel	WT	unknown	4.1	Glioblastoma, IDH-wildtype. Grade 4.
TCGA-06-0745	59	glioblastoma	G4	WT	Gain chr 7 & loss chr 10	Mutant	WT	2	-2	-2	non-codel	WT	unknown	4.1	Glioblastoma, IDH-wildtype. Grade 4.
TCGA-06-0747	53	glioblastoma	G4	WT	No combined CNA	unknown	WT	2	-2	-2	non-codel	WT	unknown	4.1	Glioblastoma, IDH-wildtype. Grade 4.
TCGA-06-0749	50	glioblastoma	G4	WT	Gain chr 7 & loss chr 10	unknown	WT	1	-2	-2	non-codel	WT	unknown	4.1	Glioblastoma, IDH-wildtype. Grade 4.
TCGA-06-0750	43	glioblastoma	G4	WT	Gain chr 7 & loss chr 10	unknown	WT	2	-2	-2	non-codel	WT	unknown	4.1	Glioblastoma, IDH-wildtype. Grade 4.
TCGA-06-0875	61	glioblastoma	G4	WT	Gain chr 7 & loss chr 10	unknown	WT	1	-1	-1	non-codel	WT	Unmethylated	4.1	Glioblastoma, IDH-wildtype. Grade 4.
TCGA-06-0876	72	glioblastoma	G4	WT	Gain chr 7 & loss chr 10	unknown	WT	2	-2	-2	non-codel	WT	Methylated	4.1	Glioblastoma, IDH-wildtype. Grade 4.
TCGA-06-0877	78	glioblastoma	G4	WT	Gain chr 7 & loss chr 10	Mutant	WT	2	-2	-2	non-codel	WT	Methylated	4.1	Glioblastoma, IDH-wildtype. Grade 4.
TCGA-06-0878	74	glioblastoma	G4	WT	Gain chr 7 & loss chr 10	unknown	WT	2	-2	-2	non-codel	WT	Unmethylated	4.1	Glioblastoma, IDH-wildtype. Grade 4.
TCGA-06-0879	52	glioblastoma	G4	WT	Gain chr 7 & loss chr 10	unknown	WT	1	-2	-2	non-codel	WT	Methylated	4.1	Glioblastoma, IDH-wildtype. Grade 4.
TCGA-06-0881	50	glioblastoma	G4	WT	No combined CNA	unknown	WT	2	0	0	non-codel	WT	Unmethylated	4.1	Glioblastoma, IDH-wildtype. Grade 4.
TCGA-06-0882	30	glioblastoma	G4	WT	Gain chr 7 & loss chr 10	unknown	WT	1	-2	-2	non-codel	WT	Unmethylated	4.1	Glioblastoma, IDH-wildtype. Grade 4.
TCGA-06-0939	79	glioblastoma	G4	WT	Gain chr 7 & loss chr 10	unknown	WT	1	0	0	non-codel	WT	Unmethylated	4.1	Glioblastoma, IDH-wildtype. Grade 4.
TCGA-06-1084	54	glioblastoma	G4	WT	Gain chr 7 & loss chr 10	unknown	unknown	1	-1	-1	non-codel	WT	Methylated	4.1	Glioblastoma, IDH-wildtype. Grade 4.
TCGA-06-1086	42	glioblastoma	G4	unknown	No combined CNA	unknown	unknown	1	-2	-2	non-codel	unknown	Unmethylated	4.8	NA. Grade NA.
TCGA-06-1087	75	glioblastoma	G4	WT	Gain chr 7 & loss chr 10	unknown	unknown	2	-1	-1	non-codel	WT	Unmethylated	4.1	Glioblastoma, IDH-wildtype. Grade 4.
TCGA-06-1800	61	glioblastoma	G4	WT	Gain chr 7 & loss chr 10	unknown	unknown	1	-1	-1	non-codel	WT	Methylated	4.1	Glioblastoma, IDH-wildtype. Grade 4.
TCGA-06-1801	56	glioblastoma	G4	WT	Gain chr 7 & loss chr 10	unknown	unknown	1	-2	-2	non-codel	WT	Unmethylated	4.1	Glioblastoma, IDH-wildtype. Grade 4.
TCGA-06-5416	23	glioblastoma	G4	WT (maf)	No combined CNA	unknown	unknown	0	1	1	non-codel	WT	Unmethylated	4.2	Glioblastoma, IDH-wildtype. Grade 4.
TCGA-06-1804	81	glioblastoma	G4	WT	Gain chr 7 & loss chr 10	unknown	WT	1	-1	-1	non-codel	WT	Methylated	4.1	Glioblastoma, IDH-wildtype. Grade 4.
TCGA-06-1805	28	glioblastoma	G4	Mutant	No combined CNA	unknown	unknown	0	0	0	non-codel	WT	Unmethylated	4.5	Astrocytoma, IDH-mutant. Grade 4.
TCGA-DB-A75P	25	astrocytoma	G2	WT	No combined CNA	unknown	WT	0	-2	-2	non-codel	WT	Unmethylated	2.8	NA. Grade NA.
TCGA-06-2557	76	glioblastoma	G4	WT	No combined CNA	Mutant	WT	2	-1	-1	non-codel	WT	Unmethylated	4.1	Glioblastoma, IDH-wildtype. Grade 4.
TCGA-06-2558	75	glioblastoma	G4	WT	Gain chr 7 & loss chr 10	unknown	WT	2	0	0	non-codel	WT	Unmethylated	4.1	Glioblastoma, IDH-wildtype. Grade 4.
TCGA-CS-6669	26	oligodendroglioma	G2	WT	No combined CNA	WT	WT	0	0	0	non-codel	WT	Unmethylated	1.11	NA. Grade NA.
TCGA-06-2561	53	glioblastoma	G4	WT	Gain chr 7 & loss chr 10	unknown	WT	1	-2	-2	non-codel	WT	Unmethylated	4.1	Glioblastoma, IDH-wildtype. Grade 4.
TCGA-06-2562	81	glioblastoma	G4	WT	Gain chr 7 & loss chr 10	unknown	WT	1	-2	-1	non-codel	WT	Unmethylated	4.1	Glioblastoma, IDH-wildtype. Grade 4.
TCGA-06-2563	72	glioblastoma	G4	WT	Gain chr 7 & loss chr 10	unknown	WT	2	-2	-2	non-codel	WT	Methylated	4.1	Glioblastoma, IDH-wildtype. Grade 4.
TCGA-06-2564	50	glioblastoma	G4	WT	Gain chr 7 & loss chr 10	unknown	WT	2	-1	-1	non-codel	WT	Unmethylated	4.1	Glioblastoma, IDH-wildtype. Grade 4.
TCGA-06-2565	59	glioblastoma	G4	WT	No combined CNA	unknown	WT	2	-2	-2	non-codel	WT	Methylated	4.1	Glioblastoma, IDH-wildtype. Grade 4.
TCGA-P5-A5F6	26	oligodendroglioma	G2	WT	No combined CNA	WT	WT	-1	-1	-1	non-codel	WT	Unmethylated	1.11	NA. Grade NA.
TCGA-06-2567	65	glioblastoma	G4	WT	Gain chr 7 & loss chr 10	unknown	WT	1	-1	-1	non-codel	WT	Methylated	4.1	Glioblastoma, IDH-wildtype. Grade 4.
TCGA-HT-8558	29	oligodendroglioma	G2	WT	unknown	WT	WT	unknown	unknown	unknown	non-codel	WT	Unmethylated	1.11	NA. Grade NA.
TCGA-06-2570	21	glioblastoma	G4	Mutant	No combined CNA	WT	Mutant	0	0	0	non-codel	WT	Methylated	4.5	Astrocytoma, IDH-mutant. Grade 4.
TCGA-06-5408	54	glioblastoma	G4	WT	Gain chr 7 & loss chr 10	unknown	WT	2	-2	-2	non-codel	WT	Unmethylated	4.1	Glioblastoma, IDH-wildtype. Grade 4.
TCGA-HT-7469	30	oligodendroglioma	G3	WT	No combined CNA	WT	Mutant	0	-1	-1	non-codel	G34R	Methylated	1.12	NA. Grade NA.
TCGA-06-5411	51	glioblastoma	G4	WT	Gain chr 7 & loss chr 10	Mutant	WT	1	-2	-2	non-codel	WT	Unmethylated	4.1	Glioblastoma, IDH-wildtype. Grade 4.
TCGA-HT-7691	31	astrocytoma	G2	WT	No combined CNA	WT	WT	0	0	0	non-codel	WT	Unmethylated	2.8	NA. Grade NA.
TCGA-06-5413	67	glioblastoma	G4	WT	Gain chr 7 & loss chr 10	unknown	WT	2	-2	-2	non-codel	WT	Unmethylated	4.1	Glioblastoma, IDH-wildtype. Grade 4.
TCGA-06-5414	61	glioblastoma	G4	WT	Gain chr 7 & loss chr 10	unknown	WT	2	-2	-2	non-codel	WT	Unmethylated	4.1	Glioblastoma, IDH-wildtype. Grade 4.
TCGA-06-5415	60	glioblastoma	G4	WT	Gain chr 7 & loss chr 10	Mutant	WT	2	-2	-2	non-codel	WT	Unmethylated	4.1	Glioblastoma, IDH-wildtype. Grade 4.
TCGA-HT-7680	32	astrocytoma	G2	WT	No combined CNA	WT	WT	0	0	0	non-codel	WT	Unmethylated	2.8	NA. Grade NA.
TCGA-06-5417	45	glioblastoma	G4	Mutant	unknown	unknown	Mutant	unknown	unknown	unknown	unknown	WT	Methylated	4.7	NA. Grade NA.
TCGA-06-5418	75	glioblastoma	G4	WT	Gain chr 7 & loss chr 10	unknown	WT	1	-2	-2	non-codel	WT	Unmethylated	4.1	Glioblastoma, IDH-wildtype. Grade 4.
TCGA-06-5856	58	glioblastoma	G4	WT	Gain chr 7 & loss chr 10	unknown	WT	2	-1	-1	non-codel	WT	Unmethylated	4.1	Glioblastoma, IDH-wildtype. Grade 4.
TCGA-TM-A84C	32	astrocytoma	G2	WT	No combined CNA	unknown	WT	0	0	0	non-codel	K27M	Unmethylated	2.8	NA. Grade NA.
TCGA-06-5859	63	glioblastoma	G4	WT	Gain chr 7 & loss chr 10	unknown	WT	1	-2	-2	non-codel	WT	Unmethylated	4.1	Glioblastoma, IDH-wildtype. Grade 4.
TCGA-06-6388	64	glioblastoma	G4	WT	Gain chr 7 & loss chr 10	unknown	Mutant	1	-2	-2	non-codel	WT	Unmethylated	4.1	Glioblastoma, IDH-wildtype. Grade 4.
TCGA-06-6389	49	glioblastoma	G4	Mutant	No combined CNA	unknown	WT	0	-1	-1	non-codel	WT	Methylated	4.5	Astrocytoma, IDH-mutant. Grade 4.
TCGA-06-6390	58	glioblastoma	G4	WT	Gain chr 7 & loss chr 10	unknown	WT	1	0	0	non-codel	WT	Unmethylated	4.1	Glioblastoma, IDH-wildtype. Grade 4.
TCGA-06-6391	44	glioblastoma	G4	WT	No combined CNA	unknown	Mutant	2	-2	-2	non-codel	WT	Unmethylated	4.1	Glioblastoma, IDH-wildtype. Grade 4.
TCGA-06-6693	64	glioblastoma	G4	WT	No combined CNA	unknown	WT	2	-2	-2	non-codel	WT	Unmethylated	4.1	Glioblastoma, IDH-wildtype. Grade 4.
TCGA-06-0176	34	glioblastoma	G4	WT	No combined CNA	unknown	unknown	1	0	0	non-codel	WT	unknown	4.2	Glioblastoma, IDH-wildtype. Grade 4.
TCGA-06-6695	64	glioblastoma	G4	WT	Gain chr 7 & loss chr 10	unknown	WT	1	-1	-1	non-codel	WT	Methylated	4.1	Glioblastoma, IDH-wildtype. Grade 4.
TCGA-06-6697	65	glioblastoma	G4	WT	Gain chr 7 & loss chr 10	unknown	WT	1	-2	-2	non-codel	WT	Unmethylated	4.1	Glioblastoma, IDH-wildtype. Grade 4.
TCGA-HT-8019	34	oligodendroglioma	G3	WT	No combined CNA	WT	WT	0	0	0	non-codel	WT	Unmethylated	1.12	NA. Grade NA.
TCGA-06-6699	58	glioblastoma	G4	WT	Gain chr 7 & loss chr 10	unknown	WT	2	-2	-2	non-codel	WT	Unmethylated	4.1	Glioblastoma, IDH-wildtype. Grade 4.
TCGA-06-6700	76	glioblastoma	G4	WT	No combined CNA	unknown	WT	2	-2	-2	non-codel	WT	Methylated	4.1	Glioblastoma, IDH-wildtype. Grade 4.
TCGA-06-6701	60	glioblastoma	G4	Mutant	No combined CNA	unknown	Mutant	0	-1	-1	non-codel	WT	Methylated	4.5	Astrocytoma, IDH-mutant. Grade 4.
TCGA-DU-6392	35	astrocytoma	G3	WT	No combined CNA	unknown	Mutant	1	0	0	non-codel	WT	Unmethylated	2.9	NA. Grade NA.
TCGA-06-A5U1	78	glioblastoma	G4	WT	Gain chr 7 & loss chr 10	unknown	WT	1	-2	-2	non-codel	WT	Methylated	4.1	Glioblastoma, IDH-wildtype. Grade 4.
TCGA-06-A6S0	79	glioblastoma	G4	WT	No combined CNA	unknown	WT	2	-2	-2	non-codel	WT	Unmethylated	4.1	Glioblastoma, IDH-wildtype. Grade 4.
TCGA-06-A6S1	53	glioblastoma	G4	WT	Gain chr 7 & loss chr 10	unknown	WT	1	-1	-1	non-codel	WT	Unmethylated	4.1	Glioblastoma, IDH-wildtype. Grade 4.
TCGA-VM-A8C9	37	astrocytoma	G2	WT	No combined CNA	unknown	WT	0	0	0	non-codel	WT	Unmethylated	2.8	NA. Grade NA.
TCGA-06-A7TL		unknown	unknown	Mutant	unknown	unknown	Mutant	unknown	unknown	unknown	non-codel	WT	Methylated	5.1	NA. Grade NA.
TCGA-08-0244	62	glioblastoma	G4	WT	Gain chr 7 & loss chr 10	unknown	unknown	2	-2	-2	non-codel	unknown	unknown	4.4	NA. Grade NA.
TCGA-06-0160	56	glioblastoma	G4	WT	No combined CNA	unknown	unknown	0	0	0	non-codel	unknown	unknown	4.4	NA. Grade NA.
TCGA-08-0246	57	glioblastoma	G4	WT	No combined CNA	unknown	unknown	2	-2	-2	non-codel	unknown	unknown	4.4	NA. Grade NA.
TCGA-08-0344	66	glioblastoma	G4	Mutant	No combined CNA	unknown	unknown	0	0	0	codel	unknown	unknown	4.6	Oligodendroglioma, IDH-mutant, 1p/19q-codeleted. Grade 3.
TCGA-08-0345	71	glioblastoma	G4	WT	Gain chr 7 & loss chr 10	unknown	unknown	1	-2	-2	non-codel	unknown	unknown	4.4	NA. Grade NA.
TCGA-08-0346	69	glioblastoma	G4	WT	Gain chr 7 & loss chr 10	unknown	unknown	1	-2	-2	non-codel	unknown	unknown	4.4	NA. Grade NA.
TCGA-08-0347	50	glioblastoma	G4	WT	Gain chr 7 & loss chr 10	unknown	unknown	1	-2	-2	non-codel	unknown	unknown	4.4	NA. Grade NA.
TCGA-08-0348	63	glioblastoma	G4	WT	Gain chr 7 & loss chr 10	unknown	unknown	1	-1	-1	non-codel	unknown	unknown	4.4	NA. Grade NA.
TCGA-08-0349	46	glioblastoma	G4	WT	Gain chr 7 & loss chr 10	unknown	unknown	2	0	0	non-codel	unknown	unknown	4.4	NA. Grade NA.
TCGA-02-0004	59	glioblastoma	G4	WT	unknown	unknown	unknown	unknown	unknown	unknown	unknown	unknown	unknown	4.4	NA. Grade NA.
TCGA-06-0147	51	glioblastoma	G4	WT	No combined CNA	unknown	unknown	1	0	0	non-codel	unknown	Methylated	4.4	NA. Grade NA.
TCGA-08-0352	79	glioblastoma	G4	WT	Gain chr 7 & loss chr 10	unknown	unknown	2	-1	-1	non-codel	unknown	unknown	4.4	NA. Grade NA.
TCGA-08-0353	58	glioblastoma	G4	WT	Gain chr 7 & loss chr 10	unknown	unknown	2	-2	-2	non-codel	unknown	unknown	4.4	NA. Grade NA.
TCGA-08-0354	52	glioblastoma	G4	WT	Gain chr 7 & loss chr 10	unknown	unknown	2	-2	-2	non-codel	unknown	unknown	4.4	NA. Grade NA.
TCGA-08-0355	30	glioblastoma	G4	WT	No combined CNA	unknown	unknown	2	-2	-2	non-codel	unknown	unknown	4.4	NA. Grade NA.
TCGA-08-0356	59	glioblastoma	G4	WT	Gain chr 7 & loss chr 10	unknown	unknown	2	-1	-1	non-codel	unknown	unknown	4.4	NA. Grade NA.
TCGA-08-0357	49	glioblastoma	G4	WT	Gain chr 7 & loss chr 10	unknown	unknown	2	-2	-2	non-codel	unknown	unknown	4.4	NA. Grade NA.
TCGA-08-0358	50	glioblastoma	G4	WT	Gain chr 7 & loss chr 10	unknown	unknown	2	-2	-2	non-codel	unknown	unknown	4.4	NA. Grade NA.
TCGA-08-0359	59	glioblastoma	G4	WT	Gain chr 7 & loss chr 10	unknown	unknown	1	-2	-2	non-codel	unknown	unknown	4.4	NA. Grade NA.
TCGA-08-0373	69	glioblastoma	G4	WT	unknown	unknown	unknown	unknown	unknown	unknown	unknown	unknown	unknown	4.4	NA. Grade NA.
TCGA-08-0385	71	glioblastoma	G4	WT	unknown	unknown	unknown	unknown	unknown	unknown	unknown	unknown	unknown	4.4	NA. Grade NA.
TCGA-08-0375	51	glioblastoma	G4	WT	Gain chr 7 & loss chr 10	unknown	unknown	2	-2	-2	non-codel	unknown	unknown	4.4	NA. Grade NA.
TCGA-08-0380	74	glioblastoma	G4	WT	Gain chr 7 & loss chr 10	unknown	unknown	1	0	0	non-codel	unknown	unknown	4.4	NA. Grade NA.
TCGA-08-0360	76	glioblastoma	G4	WT	unknown	unknown	unknown	unknown	unknown	unknown	unknown	unknown	unknown	4.4	NA. Grade NA.
TCGA-08-0386	74	glioblastoma	G4	WT	Gain chr 7 & loss chr 10	unknown	WT	2	1	1	non-codel	WT	unknown	4.1	Glioblastoma, IDH-wildtype. Grade 4.
TCGA-08-0389	59	glioblastoma	G4	WT	Gain chr 7 & loss chr 10	unknown	unknown	1	0	0	non-codel	unknown	unknown	4.4	NA. Grade NA.
TCGA-08-0390	69	glioblastoma	G4	WT	Gain chr 7 & loss chr 10	unknown	unknown	2	-2	-2	non-codel	unknown	unknown	4.4	NA. Grade NA.
TCGA-08-0392	60	glioblastoma	G4	WT	Gain chr 7 & loss chr 10	unknown	unknown	1	-2	-2	non-codel	unknown	unknown	4.4	NA. Grade NA.
TCGA-08-0509	63	glioblastoma	G4	unknown	Gain chr 7 & loss chr 10	unknown	unknown	1	-2	-2	non-codel	unknown	unknown	4.8	NA. Grade NA.
TCGA-08-0510	75	glioblastoma	G4	unknown	Gain chr 7 & loss chr 10	unknown	unknown	1	-2	-2	non-codel	unknown	unknown	4.8	NA. Grade NA.
TCGA-08-0511	69	glioblastoma	G4	unknown	unknown	unknown	unknown	unknown	unknown	unknown	unknown	unknown	unknown	4.8	NA. Grade NA.
TCGA-08-0512	48	glioblastoma	G4	unknown	No combined CNA	unknown	unknown	0	-2	-2	non-codel	unknown	unknown	4.8	NA. Grade NA.
TCGA-08-0514	69	glioblastoma	G4	unknown	No combined CNA	unknown	unknown	2	-2	-2	non-codel	unknown	unknown	4.8	NA. Grade NA.
TCGA-08-0516	14	glioblastoma	G4	unknown	No combined CNA	unknown	unknown	-1	-1	-1	non-codel	unknown	unknown	4.8	NA. Grade NA.
TCGA-08-0517	34	glioblastoma	G4	unknown	No combined CNA	unknown	unknown	-1	-2	-2	non-codel	unknown	unknown	4.8	NA. Grade NA.
TCGA-08-0518	60	glioblastoma	G4	unknown	Gain chr 7 & loss chr 10	unknown	unknown	2	-2	-2	non-codel	unknown	unknown	4.8	NA. Grade NA.
TCGA-08-0520	70	glioblastoma	G4	unknown	Gain chr 7 & loss chr 10	unknown	unknown	1	-2	-2	non-codel	unknown	unknown	4.8	NA. Grade NA.
TCGA-08-0521	17	glioblastoma	G4	unknown	No combined CNA	unknown	unknown	0	-2	-2	non-codel	unknown	unknown	4.8	NA. Grade NA.
TCGA-08-0522	61	glioblastoma	G4	unknown	unknown	unknown	unknown	unknown	unknown	unknown	unknown	unknown	unknown	4.8	NA. Grade NA.
TCGA-08-0524	17	glioblastoma	G4	unknown	No combined CNA	unknown	unknown	0	0	0	non-codel	unknown	unknown	4.8	NA. Grade NA.
TCGA-08-0525	52	glioblastoma	G4	unknown	Gain chr 7 & loss chr 10	unknown	unknown	2	-2	-2	non-codel	unknown	unknown	4.8	NA. Grade NA.
TCGA-08-0529	56	glioblastoma	G4	unknown	Gain chr 7 & loss chr 10	unknown	unknown	2	-2	-2	non-codel	unknown	unknown	4.8	NA. Grade NA.
TCGA-08-0531	64	glioblastoma	G4	unknown	No combined CNA	unknown	unknown	2	-2	-2	non-codel	unknown	unknown	4.8	NA. Grade NA.
TCGA-12-0615	78	glioblastoma	G4	WT	No combined CNA	unknown	WT	2	-2	-2	non-codel	WT	unknown	4.1	Glioblastoma, IDH-wildtype. Grade 4.
TCGA-12-0616	36	glioblastoma	G4	WT	No combined CNA	unknown	WT	2	0	0	non-codel	WT	unknown	4.1	Glioblastoma, IDH-wildtype. Grade 4.
TCGA-12-0618	49	glioblastoma	G4	WT	Gain chr 7 & loss chr 10	unknown	WT	1	0	0	non-codel	WT	unknown	4.1	Glioblastoma, IDH-wildtype. Grade 4.
TCGA-12-0619	60	glioblastoma	G4	WT	Gain chr 7 & loss chr 10	unknown	WT	2	0	0	non-codel	WT	unknown	4.1	Glioblastoma, IDH-wildtype. Grade 4.
TCGA-12-0620	57	glioblastoma	G4	WT	Gain chr 7 & loss chr 10	unknown	unknown	1	-2	-2	non-codel	unknown	unknown	4.4	NA. Grade NA.
TCGA-12-0653		unknown	unknown	WT	unknown	unknown	unknown	unknown	unknown	unknown	unknown	unknown	unknown	5.1	NA. Grade NA.
TCGA-12-0654	48	glioblastoma	G4	unknown	Gain chr 7 & loss chr 10	unknown	unknown	1	-2	-2	non-codel	unknown	unknown	4.8	NA. Grade NA.
TCGA-12-0656	48	glioblastoma	G4	WT	Gain chr 7 & loss chr 10	unknown	unknown	1	-2	-2	non-codel	WT	unknown	4.1	Glioblastoma, IDH-wildtype. Grade 4.
TCGA-12-0657	69	glioblastoma	G4	WT	Gain chr 7 & loss chr 10	unknown	unknown	2	-2	-2	non-codel	WT	unknown	4.1	Glioblastoma, IDH-wildtype. Grade 4.
TCGA-12-0662	51	glioblastoma	G4	WT	Gain chr 7 & loss chr 10	unknown	unknown	2	0	0	non-codel	WT	unknown	4.1	Glioblastoma, IDH-wildtype. Grade 4.
TCGA-12-0670	60	glioblastoma	G4	WT	Gain chr 7 & loss chr 10	unknown	unknown	2	-2	-2	non-codel	WT	Methylated	4.1	Glioblastoma, IDH-wildtype. Grade 4.
TCGA-12-0688	74	glioblastoma	G4	WT	Gain chr 7 & loss chr 10	unknown	WT	2	-2	-2	non-codel	WT	unknown	4.1	Glioblastoma, IDH-wildtype. Grade 4.
TCGA-12-0691	63	glioblastoma	G4	WT	Gain chr 7 & loss chr 10	unknown	unknown	1	-1	-1	non-codel	WT	unknown	4.1	Glioblastoma, IDH-wildtype. Grade 4.
TCGA-12-0692	75	glioblastoma	G4	WT	Gain chr 7 & loss chr 10	unknown	WT	1	-2	-2	non-codel	WT	unknown	4.1	Glioblastoma, IDH-wildtype. Grade 4.
TCGA-12-0703	46	glioblastoma	G4	unknown	Gain chr 7 & loss chr 10	unknown	unknown	1	-2	-2	non-codel	unknown	unknown	4.8	NA. Grade NA.
TCGA-12-0707	55	glioblastoma	G4	WT	Gain chr 7 & loss chr 10	unknown	unknown	2	-2	-2	non-codel	WT	unknown	4.1	Glioblastoma, IDH-wildtype. Grade 4.
TCGA-12-0769	52	glioblastoma	G4	unknown	Gain chr 7 & loss chr 10	unknown	unknown	2	0	0	non-codel	unknown	unknown	4.8	NA. Grade NA.
TCGA-12-0772	46	glioblastoma	G4	WT (maf)	Gain chr 7 & loss chr 10	unknown	unknown	1	0	0	non-codel	WT	unknown	4.1	Glioblastoma, IDH-wildtype. Grade 4.
TCGA-14-3477	38	glioblastoma	G4	WT	No combined CNA	unknown	unknown	-1	0	0	non-codel	WT	Unmethylated	4.2	Glioblastoma, IDH-wildtype. Grade 4.
TCGA-12-0775	75	glioblastoma	G4	WT	Gain chr 7 & loss chr 10	unknown	unknown	1	-2	-2	non-codel	WT	unknown	4.1	Glioblastoma, IDH-wildtype. Grade 4.
TCGA-12-0776	52	glioblastoma	G4	unknown	Gain chr 7 & loss chr 10	unknown	unknown	2	0	0	non-codel	unknown	unknown	4.8	NA. Grade NA.
TCGA-12-0778	53	glioblastoma	G4	WT	Gain chr 7 & loss chr 10	unknown	unknown	2	-2	-2	non-codel	WT	unknown	4.1	Glioblastoma, IDH-wildtype. Grade 4.
TCGA-12-0780	51	glioblastoma	G4	unknown	Gain chr 7 & loss chr 10	unknown	unknown	2	-2	-2	non-codel	unknown	unknown	4.8	NA. Grade NA.
TCGA-12-0818	45	glioblastoma	G4	Mutant	No combined CNA	unknown	unknown	0	-1	-1	non-codel	WT	Methylated	4.5	Astrocytoma, IDH-mutant. Grade 4.
TCGA-12-0819	49	glioblastoma	G4	WT	Gain chr 7 & loss chr 10	unknown	unknown	2	-2	-2	non-codel	WT	Methylated	4.1	Glioblastoma, IDH-wildtype. Grade 4.
TCGA-12-0820	40	glioblastoma	G4	WT	Gain chr 7 & loss chr 10	unknown	unknown	1	0	0	non-codel	WT	Unmethylated	4.1	Glioblastoma, IDH-wildtype. Grade 4.
TCGA-12-0821	62	glioblastoma	G4	WT	Gain chr 7 & loss chr 10	unknown	WT	2	-2	-2	non-codel	WT	Unmethylated	4.1	Glioblastoma, IDH-wildtype. Grade 4.
TCGA-12-0822	46	glioblastoma	G4	WT	Gain chr 7 & loss chr 10	unknown	unknown	1	-2	-2	non-codel	WT	Methylated	4.1	Glioblastoma, IDH-wildtype. Grade 4.
TCGA-12-0826	38	glioblastoma	G4	WT	Gain chr 7 & loss chr 10	unknown	unknown	1	-1	-1	non-codel	WT	Unmethylated	4.1	Glioblastoma, IDH-wildtype. Grade 4.
TCGA-12-0827	38	glioblastoma	G4	Mutant	No combined CNA	unknown	unknown	0	-2	-2	non-codel	WT	Methylated	4.5	Astrocytoma, IDH-mutant. Grade 4.
TCGA-12-0828	57	glioblastoma	G4	WT	Gain chr 7 & loss chr 10	unknown	unknown	2	-2	-2	non-codel	WT	Unmethylated	4.1	Glioblastoma, IDH-wildtype. Grade 4.
TCGA-12-0829	75	glioblastoma	G4	WT	Gain chr 7 & loss chr 10	unknown	unknown	2	-2	-2	non-codel	WT	Methylated	4.1	Glioblastoma, IDH-wildtype. Grade 4.
TCGA-12-1088	53	glioblastoma	G4	WT	Gain chr 7 & loss chr 10	unknown	unknown	1	-1	-1	non-codel	WT	Unmethylated	4.1	Glioblastoma, IDH-wildtype. Grade 4.
TCGA-12-1089	64	glioblastoma	G4	WT	No combined CNA	unknown	unknown	2	-2	-2	non-codel	WT	Unmethylated	4.1	Glioblastoma, IDH-wildtype. Grade 4.
TCGA-12-1090	58	glioblastoma	G4	unknown	No combined CNA	unknown	unknown	1	0	0	non-codel	unknown	Methylated	4.8	NA. Grade NA.
TCGA-12-1091	10	glioblastoma	G4	unknown	No combined CNA	unknown	unknown	1	-2	-2	non-codel	unknown	Methylated	4.8	NA. Grade NA.
TCGA-DH-5140	38	oligoastrocytoma	G3	WT	No combined CNA	WT	WT	0	-1	-1	non-codel	WT	Unmethylated	3.11	NA. Grade NA.
TCGA-12-1093	66	glioblastoma	G4	WT	Gain chr 7 & loss chr 10	unknown	unknown	1	-1	-1	non-codel	WT	Unmethylated	4.1	Glioblastoma, IDH-wildtype. Grade 4.
TCGA-12-1094	56	glioblastoma	G4	unknown	Gain chr 7 & loss chr 10	unknown	unknown	2	-2	-2	non-codel	unknown	Unmethylated	4.8	NA. Grade NA.
TCGA-12-1095	65	glioblastoma	G4	unknown	Gain chr 7 & loss chr 10	unknown	unknown	1	-2	-2	non-codel	unknown	Unmethylated	4.8	NA. Grade NA.
TCGA-12-1096	55	glioblastoma	G4	unknown	Gain chr 7 & loss chr 10	unknown	unknown	1	-2	-2	non-codel	unknown	Unmethylated	4.8	NA. Grade NA.
TCGA-12-1097	61	glioblastoma	G4	unknown	Gain chr 7 & loss chr 10	unknown	unknown	2	-2	-2	non-codel	unknown	Unmethylated	4.8	NA. Grade NA.
TCGA-12-1098	75	glioblastoma	G4	unknown	No combined CNA	unknown	unknown	1	-2	-1	non-codel	unknown	Unmethylated	4.8	NA. Grade NA.
TCGA-12-1099	68	glioblastoma	G4	unknown	No combined CNA	unknown	unknown	1	-1	-1	non-codel	unknown	Unmethylated	4.8	NA. Grade NA.
TCGA-06-0139	40	glioblastoma	G4	WT	No combined CNA	unknown	WT	1	-1	-1	non-codel	WT	Unmethylated	4.2	Glioblastoma, IDH-wildtype. Grade 4.
TCGA-12-1598	75	glioblastoma	G4	WT	Gain chr 7 & loss chr 10	unknown	unknown	2	0	0	non-codel	WT	Methylated	4.1	Glioblastoma, IDH-wildtype. Grade 4.
TCGA-12-1599	47	glioblastoma	G4	WT	Gain chr 7 & loss chr 10	unknown	unknown	1	-2	-2	non-codel	WT	Methylated	4.1	Glioblastoma, IDH-wildtype. Grade 4.
TCGA-12-1600	86	glioblastoma	G4	WT	Gain chr 7 & loss chr 10	unknown	unknown	2	0	0	non-codel	WT	Unmethylated	4.1	Glioblastoma, IDH-wildtype. Grade 4.
TCGA-12-1601		unknown	unknown	WT	unknown	unknown	unknown	unknown	unknown	unknown	unknown	unknown	Unmethylated	5.1	NA. Grade NA.
TCGA-12-1602	58	glioblastoma	G4	WT	Gain chr 7 & loss chr 10	unknown	unknown	1	-1	-1	non-codel	WT	Methylated	4.1	Glioblastoma, IDH-wildtype. Grade 4.
TCGA-12-3644	47	glioblastoma	G4	WT	Gain chr 7 & loss chr 10	unknown	unknown	1	0	0	non-codel	WT	Methylated	4.1	Glioblastoma, IDH-wildtype. Grade 4.
TCGA-12-3646	59	glioblastoma	G4	WT	Gain chr 7 & loss chr 10	unknown	unknown	1	1	1	non-codel	WT	Methylated	4.1	Glioblastoma, IDH-wildtype. Grade 4.
TCGA-12-3648	61	glioblastoma	G4	WT	Gain chr 7 & loss chr 10	unknown	unknown	2	-2	-2	non-codel	WT	Methylated	4.1	Glioblastoma, IDH-wildtype. Grade 4.
TCGA-12-3649	76	glioblastoma	G4	WT	Gain chr 7 & loss chr 10	unknown	WT	2	-2	-2	non-codel	WT	Unmethylated	4.1	Glioblastoma, IDH-wildtype. Grade 4.
TCGA-12-3650	46	glioblastoma	G4	WT	Gain chr 7 & loss chr 10	unknown	WT	2	-2	-2	non-codel	WT	Unmethylated	4.1	Glioblastoma, IDH-wildtype. Grade 4.
TCGA-12-3651	77	glioblastoma	G4	WT	Gain chr 7 & loss chr 10	unknown	unknown	1	-2	-1	non-codel	WT	Methylated	4.1	Glioblastoma, IDH-wildtype. Grade 4.
TCGA-12-3652	60	glioblastoma	G4	WT	No combined CNA	unknown	WT	2	-2	-2	non-codel	WT	Unmethylated	4.1	Glioblastoma, IDH-wildtype. Grade 4.
TCGA-12-3653	34	glioblastoma	G4	WT	Gain chr 7 & loss chr 10	unknown	WT	2	-2	-2	non-codel	WT	Unmethylated	4.1	Glioblastoma, IDH-wildtype. Grade 4.
TCGA-12-5295	60	glioblastoma	G4	WT	Gain chr 7 & loss chr 10	unknown	WT	2	-2	-2	non-codel	WT	Methylated	4.1	Glioblastoma, IDH-wildtype. Grade 4.
TCGA-12-5299	56	glioblastoma	G4	WT	Gain chr 7 & loss chr 10	unknown	WT	1	-2	-2	non-codel	WT	Unmethylated	4.1	Glioblastoma, IDH-wildtype. Grade 4.
TCGA-12-5301	59	glioblastoma	G4	WT	Gain chr 7 & loss chr 10	unknown	WT	1	-2	-2	non-codel	WT	Methylated	4.1	Glioblastoma, IDH-wildtype. Grade 4.
TCGA-14-0736	49	glioblastoma	G4	WT (maf)	Gain chr 7 & loss chr 10	unknown	unknown	1	-2	-2	non-codel	WT	Unmethylated	4.1	Glioblastoma, IDH-wildtype. Grade 4.
TCGA-32-4209	40	glioblastoma	G4	WT	unknown	unknown	WT	unknown	unknown	unknown	unknown	WT	Methylated	4.2	Glioblastoma, IDH-wildtype. Grade 4.
TCGA-06-0167	44	glioblastoma	G4	WT	unknown	unknown	WT	unknown	unknown	unknown	unknown	WT	unknown	4.2	Glioblastoma, IDH-wildtype. Grade 4.
TCGA-14-0783	36	glioblastoma	G4	unknown	Gain chr 7 & loss chr 10	unknown	unknown	2	-1	-1	non-codel	unknown	Methylated	4.8	NA. Grade NA.
TCGA-14-0786	50	glioblastoma	G4	WT	Gain chr 7 & loss chr 10	unknown	WT	2	-2	-2	non-codel	WT	Methylated	4.1	Glioblastoma, IDH-wildtype. Grade 4.
TCGA-14-0787	69	glioblastoma	G4	WT	Gain chr 7 & loss chr 10	unknown	WT	2	-2	-2	non-codel	WT	Methylated	4.1	Glioblastoma, IDH-wildtype. Grade 4.
TCGA-14-0789	54	glioblastoma	G4	WT	Gain chr 7 & loss chr 10	unknown	WT	2	-2	-1	non-codel	WT	Methylated	4.1	Glioblastoma, IDH-wildtype. Grade 4.
TCGA-14-0790	64	glioblastoma	G4	WT	Gain chr 7 & loss chr 10	unknown	WT	2	-2	-2	non-codel	WT	Methylated	4.1	Glioblastoma, IDH-wildtype. Grade 4.
TCGA-14-0812	65	glioblastoma	G4	WT	Gain chr 7 & loss chr 10	unknown	unknown	2	1	1	non-codel	WT	Methylated	4.1	Glioblastoma, IDH-wildtype. Grade 4.
TCGA-14-0813	78	glioblastoma	G4	WT	Gain chr 7 & loss chr 10	unknown	WT	1	-2	-2	non-codel	WT	Methylated	4.1	Glioblastoma, IDH-wildtype. Grade 4.
TCGA-14-0817	69	glioblastoma	G4	WT	Gain chr 7 & loss chr 10	unknown	WT	2	-2	-2	non-codel	WT	Unmethylated	4.1	Glioblastoma, IDH-wildtype. Grade 4.
TCGA-06-5858	45	glioblastoma	G4	WT	No combined CNA	unknown	Mutant	1	0	0	non-codel	WT	Unmethylated	4.2	Glioblastoma, IDH-wildtype. Grade 4.
TCGA-06-1806	47	glioblastoma	G4	WT	No combined CNA	unknown	WT	1	-1	-1	non-codel	WT	Unmethylated	4.2	Glioblastoma, IDH-wildtype. Grade 4.
TCGA-14-0866	55	glioblastoma	G4	WT (maf)	Gain chr 7 & loss chr 10	unknown	unknown	2	-2	-2	non-codel	WT	Methylated	4.1	Glioblastoma, IDH-wildtype. Grade 4.
TCGA-14-0867	67	glioblastoma	G4	WT	Gain chr 7 & loss chr 10	unknown	unknown	1	1	1	non-codel	WT	Methylated	4.1	Glioblastoma, IDH-wildtype. Grade 4.
TCGA-14-0871	74	glioblastoma	G4	WT	Gain chr 7 & loss chr 10	unknown	WT	1	-1	-1	non-codel	WT	Unmethylated	4.1	Glioblastoma, IDH-wildtype. Grade 4.
TCGA-14-1034	60	glioblastoma	G4	WT	Gain chr 7 & loss chr 10	Mutant	WT	1	0	0	non-codel	WT	Methylated	4.1	Glioblastoma, IDH-wildtype. Grade 4.
TCGA-14-1037	66	glioblastoma	G4	WT	Gain chr 7 & loss chr 10	unknown	unknown	2	-2	-2	non-codel	WT	Unmethylated	4.1	Glioblastoma, IDH-wildtype. Grade 4.
TCGA-14-1043	61	glioblastoma	G4	WT	Gain chr 7 & loss chr 10	unknown	WT	2	-2	-2	non-codel	WT	Unmethylated	4.1	Glioblastoma, IDH-wildtype. Grade 4.
TCGA-14-1395	52	glioblastoma	G4	WT	Gain chr 7 & loss chr 10	unknown	WT	2	-1	-1	non-codel	WT	Unmethylated	4.1	Glioblastoma, IDH-wildtype. Grade 4.
TCGA-26-A7UX	47	glioblastoma	G4	WT	unknown	unknown	WT	unknown	unknown	unknown	non-codel	WT	Methylated	4.2	Glioblastoma, IDH-wildtype. Grade 4.
TCGA-14-1401	54	glioblastoma	G4	unknown	Gain chr 7 & loss chr 10	unknown	unknown	2	-2	-2	non-codel	unknown	Methylated	4.8	NA. Grade NA.
TCGA-14-1402	58	glioblastoma	G4	WT (maf)	No combined CNA	Mutant	unknown	2	-2	-2	non-codel	WT	Methylated	4.1	Glioblastoma, IDH-wildtype. Grade 4.
TCGA-14-1450	57	glioblastoma	G4	WT	Gain chr 7 & loss chr 10	unknown	WT	1	0	0	non-codel	WT	Methylated	4.1	Glioblastoma, IDH-wildtype. Grade 4.
TCGA-14-1451	39	glioblastoma	G4	WT	Gain chr 7 & loss chr 10	unknown	unknown	1	0	0	non-codel	WT	Unmethylated	4.1	Glioblastoma, IDH-wildtype. Grade 4.
TCGA-14-1452	60	glioblastoma	G4	unknown	Gain chr 7 & loss chr 10	unknown	unknown	2	-2	-2	non-codel	unknown	Methylated	4.8	NA. Grade NA.
TCGA-14-1453	69	glioblastoma	G4	WT	No combined CNA	unknown	unknown	2	-1	-1	non-codel	WT	Unmethylated	4.1	Glioblastoma, IDH-wildtype. Grade 4.
TCGA-14-1454	54	glioblastoma	G4	unknown	Gain chr 7 & loss chr 10	unknown	unknown	1	0	0	non-codel	unknown	Unmethylated	4.8	NA. Grade NA.
TCGA-14-1455	61	glioblastoma	G4	WT	Gain chr 7 & loss chr 10	unknown	unknown	1	-2	-2	non-codel	WT	Methylated	4.1	Glioblastoma, IDH-wildtype. Grade 4.
TCGA-14-1456	23	glioblastoma	G4	Mutant	No combined CNA	unknown	Mutant	1	0	0	non-codel	WT	Unmethylated	4.5	Astrocytoma, IDH-mutant. Grade 4.
TCGA-14-1458	54	glioblastoma	G4	Mutant	No combined CNA	unknown	unknown	1	-1	-1	non-codel	WT	Methylated	4.5	Astrocytoma, IDH-mutant. Grade 4.
TCGA-14-1459	63	glioblastoma	G4	unknown	Gain chr 7 & loss chr 10	unknown	unknown	2	-2	-2	non-codel	unknown	Methylated	4.8	NA. Grade NA.
TCGA-14-1794	59	glioblastoma	G4	WT	Gain chr 7 & loss chr 10	unknown	unknown	2	0	0	non-codel	WT	Unmethylated	4.1	Glioblastoma, IDH-wildtype. Grade 4.
TCGA-14-1795	66	glioblastoma	G4	WT	Gain chr 7 & loss chr 10	unknown	unknown	1	-2	-2	non-codel	WT	Methylated	4.1	Glioblastoma, IDH-wildtype. Grade 4.
TCGA-14-1821	31	glioblastoma	G4	Mutant	No combined CNA	unknown	unknown	0	-1	-1	non-codel	WT	Methylated	4.5	Astrocytoma, IDH-mutant. Grade 4.
TCGA-14-1823	58	glioblastoma	G4	WT	Gain chr 7 & loss chr 10	Mutant	WT	2	-2	-2	non-codel	WT	Methylated	4.1	Glioblastoma, IDH-wildtype. Grade 4.
TCGA-14-1825	70	glioblastoma	G4	WT	Gain chr 7 & loss chr 10	unknown	WT	1	-2	-2	non-codel	WT	Unmethylated	4.1	Glioblastoma, IDH-wildtype. Grade 4.
TCGA-14-1827	51	glioblastoma	G4	WT	Gain chr 7 & loss chr 10	unknown	unknown	2	-2	-2	non-codel	WT	Methylated	4.1	Glioblastoma, IDH-wildtype. Grade 4.
TCGA-14-1829	57	glioblastoma	G4	WT	Gain chr 7 & loss chr 10	unknown	WT	2	-2	-2	non-codel	WT	Unmethylated	4.1	Glioblastoma, IDH-wildtype. Grade 4.
TCGA-14-2554	52	glioblastoma	G4	WT	Gain chr 7 & loss chr 10	Mutant	WT	2	-2	-2	non-codel	WT	Unmethylated	4.1	Glioblastoma, IDH-wildtype. Grade 4.
TCGA-14-2555	44	glioblastoma	G4	WT (maf)	Gain chr 7 & loss chr 10	unknown	unknown	2	-1	-1	non-codel	WT	Methylated	4.1	Glioblastoma, IDH-wildtype. Grade 4.
TCGA-HT-8564	47	astrocytoma	G3	WT	No combined CNA	WT	WT	1	0	0	non-codel	WT	Unmethylated	2.9	NA. Grade NA.
TCGA-28-1760	48	glioblastoma	G4	WT	unknown	unknown	unknown	unknown	unknown	unknown	unknown	WT	Unmethylated	4.2	Glioblastoma, IDH-wildtype. Grade 4.
TCGA-14-4157	40	glioblastoma	G4	Mutant	No combined CNA	unknown	Mutant	1	-2	-2	non-codel	WT	Methylated	4.5	Astrocytoma, IDH-mutant. Grade 4.
TCGA-15-0742	65	glioblastoma	G4	WT	Gain chr 7 & loss chr 10	unknown	WT	2	-2	-2	non-codel	WT	unknown	4.1	Glioblastoma, IDH-wildtype. Grade 4.
TCGA-15-1444	21	glioblastoma	G4	Mutant	No combined CNA	WT	Mutant	0	-1	-1	non-codel	WT	Methylated	4.5	Astrocytoma, IDH-mutant. Grade 4.
TCGA-15-1446	55	glioblastoma	G4	WT	Gain chr 7 & loss chr 10	unknown	unknown	2	-2	-2	non-codel	WT	Unmethylated	4.1	Glioblastoma, IDH-wildtype. Grade 4.
TCGA-15-1447	36	glioblastoma	G4	unknown	No combined CNA	unknown	unknown	0	-1	-1	non-codel	unknown	Methylated	4.8	NA. Grade NA.
TCGA-15-1449	65	glioblastoma	G4	unknown	No combined CNA	unknown	unknown	1	-2	-2	non-codel	unknown	Methylated	4.8	NA. Grade NA.
TCGA-16-0846	85	glioblastoma	G4	WT	Gain chr 7 & loss chr 10	unknown	WT	1	-1	-1	non-codel	WT	Methylated	4.1	Glioblastoma, IDH-wildtype. Grade 4.
TCGA-16-0848	57	glioblastoma	G4	WT (maf)	Gain chr 7 & loss chr 10	unknown	unknown	1	0	0	non-codel	WT	Methylated	4.1	Glioblastoma, IDH-wildtype. Grade 4.
TCGA-16-0849	54	glioblastoma	G4	Mutant	No combined CNA	unknown	unknown	0	0	0	non-codel	WT	Unmethylated	4.5	Astrocytoma, IDH-mutant. Grade 4.
TCGA-16-0850	52	glioblastoma	G4	Mutant	No combined CNA	unknown	unknown	0	0	0	non-codel	WT	Unmethylated	4.5	Astrocytoma, IDH-mutant. Grade 4.
TCGA-16-0861	65	glioblastoma	G4	WT	No combined CNA	unknown	WT	2	-2	-2	non-codel	WT	Unmethylated	4.1	Glioblastoma, IDH-wildtype. Grade 4.
TCGA-16-1045	49	glioblastoma	G4	WT	Gain chr 7 & loss chr 10	unknown	WT	2	-2	-2	non-codel	WT	Methylated	4.1	Glioblastoma, IDH-wildtype. Grade 4.
TCGA-16-1047	66	glioblastoma	G4	unknown	Gain chr 7 & loss chr 10	unknown	unknown	2	-2	-2	non-codel	unknown	Unmethylated	4.8	NA. Grade NA.
TCGA-16-1048		unknown	unknown	WT	Gain chr 7 & loss chr 10	unknown	WT	2	-2	-2	non-codel	WT	Unmethylated	5.1	NA. Grade NA.
TCGA-16-1055	48	glioblastoma	G4	unknown	Gain chr 7 & loss chr 10	unknown	unknown	2	-2	-2	non-codel	unknown	Unmethylated	4.8	NA. Grade NA.
TCGA-16-1056	55	glioblastoma	G4	unknown	No combined CNA	unknown	unknown	0	-2	-2	non-codel	unknown	Unmethylated	4.8	NA. Grade NA.
TCGA-16-1060	70	glioblastoma	G4	unknown	No combined CNA	unknown	unknown	2	-2	-2	non-codel	unknown	Unmethylated	4.8	NA. Grade NA.
TCGA-16-1062	57	glioblastoma	G4	unknown	Gain chr 7 & loss chr 10	unknown	unknown	2	-2	-2	non-codel	unknown	Methylated	4.8	NA. Grade NA.
TCGA-16-1063	72	glioblastoma	G4	unknown	Gain chr 7 & loss chr 10	unknown	unknown	2	-2	-2	non-codel	unknown	Unmethylated	4.8	NA. Grade NA.
TCGA-16-1460	36	glioblastoma	G4	Mutant	No combined CNA	unknown	unknown	0	0	0	non-codel	WT	Methylated	4.5	Astrocytoma, IDH-mutant. Grade 4.
TCGA-19-0955	71	glioblastoma	G4	unknown	Gain chr 7 & loss chr 10	unknown	unknown	1	-2	-2	non-codel	unknown	Methylated	4.8	NA. Grade NA.
TCGA-19-0957	48	glioblastoma	G4	WT	Gain chr 7 & loss chr 10	unknown	unknown	1	0	0	non-codel	WT	Unmethylated	4.1	Glioblastoma, IDH-wildtype. Grade 4.
TCGA-19-0960	83	glioblastoma	G4	unknown	No combined CNA	unknown	unknown	-1	-1	-1	non-codel	unknown	Methylated	4.8	NA. Grade NA.
TCGA-19-0962	77	glioblastoma	G4	unknown	Gain chr 7 & loss chr 10	unknown	unknown	1	-2	-2	non-codel	unknown	Methylated	4.8	NA. Grade NA.
TCGA-19-0963	61	glioblastoma	G4	unknown	Gain chr 7 & loss chr 10	unknown	unknown	1	-2	-2	non-codel	unknown	Unmethylated	4.8	NA. Grade NA.
TCGA-19-0964	70	glioblastoma	G4	unknown	No combined CNA	unknown	unknown	2	-2	-2	non-codel	unknown	Methylated	4.8	NA. Grade NA.
TCGA-19-1787	48	glioblastoma	G4	WT (maf)	Gain chr 7 & loss chr 10	unknown	unknown	1	0	0	non-codel	WT	Methylated	4.1	Glioblastoma, IDH-wildtype. Grade 4.
TCGA-19-1386	51	glioblastoma	G4	WT	Gain chr 7 & loss chr 10	unknown	unknown	2	-2	-2	non-codel	WT	Unmethylated	4.1	Glioblastoma, IDH-wildtype. Grade 4.
TCGA-19-1387	81	glioblastoma	G4	WT	Gain chr 7 & loss chr 10	unknown	unknown	1	-2	-2	non-codel	WT	Methylated	4.1	Glioblastoma, IDH-wildtype. Grade 4.
TCGA-19-1388	58	glioblastoma	G4	WT	No combined CNA	unknown	unknown	2	-1	-1	non-codel	WT	Methylated	4.1	Glioblastoma, IDH-wildtype. Grade 4.
TCGA-19-1389	51	glioblastoma	G4	WT	Gain chr 7 & loss chr 10	Mutant	unknown	1	-2	-2	non-codel	WT	Unmethylated	4.1	Glioblastoma, IDH-wildtype. Grade 4.
TCGA-14-0781	49	glioblastoma	G4	WT	No combined CNA	unknown	WT	1	-1	-1	non-codel	WT	Unmethylated	4.2	Glioblastoma, IDH-wildtype. Grade 4.
TCGA-19-1392	72	glioblastoma	G4	unknown	Gain chr 7 & loss chr 10	unknown	unknown	1	-1	-1	non-codel	unknown	Methylated	4.8	NA. Grade NA.
TCGA-19-1786	64	glioblastoma	G4	WT	Gain chr 7 & loss chr 10	unknown	unknown	2	-2	-2	non-codel	WT	Unmethylated	4.1	Glioblastoma, IDH-wildtype. Grade 4.
TCGA-19-4065	36	glioblastoma	G4	WT (maf)	Gain chr 7 & loss chr 10	unknown	unknown	1	-2	-2	non-codel	WT	Unmethylated	4.1	Glioblastoma, IDH-wildtype. Grade 4.
TCGA-19-1788	39	glioblastoma	G4	Mutant	unknown	unknown	unknown	unknown	unknown	unknown	unknown	WT	Methylated	4.7	NA. Grade NA.
TCGA-19-1789	69	glioblastoma	G4	WT	No combined CNA	unknown	unknown	2	-2	-2	non-codel	WT	Methylated	4.1	Glioblastoma, IDH-wildtype. Grade 4.
TCGA-76-4932	50	glioblastoma	G4	WT	unknown	unknown	WT	unknown	unknown	unknown	unknown	WT	Methylated	4.2	Glioblastoma, IDH-wildtype. Grade 4.
TCGA-19-1791	82	glioblastoma	G4	WT	Gain chr 7 & loss chr 10	unknown	unknown	2	-1	-1	non-codel	WT	Unmethylated	4.1	Glioblastoma, IDH-wildtype. Grade 4.
TCGA-19-2619	55	glioblastoma	G4	WT	Gain chr 7 & loss chr 10	unknown	WT	2	-2	-2	non-codel	WT	Methylated	4.1	Glioblastoma, IDH-wildtype. Grade 4.
TCGA-19-2620	70	glioblastoma	G4	WT	No combined CNA	Mutant	WT	2	-2	-2	non-codel	WT	Methylated	4.1	Glioblastoma, IDH-wildtype. Grade 4.
TCGA-19-2621	83	glioblastoma	G4	WT	No combined CNA	unknown	unknown	2	0	0	non-codel	WT	Methylated	4.1	Glioblastoma, IDH-wildtype. Grade 4.
TCGA-19-2623	65	glioblastoma	G4	WT	Gain chr 7 & loss chr 10	unknown	WT	1	0	0	non-codel	WT	Methylated	4.1	Glioblastoma, IDH-wildtype. Grade 4.
TCGA-19-2624	51	glioblastoma	G4	WT	Gain chr 7 & loss chr 10	Mutant	WT	2	0	0	non-codel	WT	Unmethylated	4.1	Glioblastoma, IDH-wildtype. Grade 4.
TCGA-06-0165	52	glioblastoma	G4	WT	No combined CNA	unknown	WT	0	0	0	non-codel	WT	unknown	4.2	Glioblastoma, IDH-wildtype. Grade 4.
TCGA-19-2629	60	glioblastoma	G4	Mutant	No combined CNA	WT	Mutant	1	-1	-1	non-codel	WT	Unmethylated	4.5	Astrocytoma, IDH-mutant. Grade 4.
TCGA-19-2631	74	glioblastoma	G4	WT	Gain chr 7 & loss chr 10	unknown	WT	2	-2	-2	non-codel	WT	Methylated	4.1	Glioblastoma, IDH-wildtype. Grade 4.
TCGA-19-5956	53	glioblastoma	G4	WT (maf)	No combined CNA	unknown	unknown	0	-2	-2	non-codel	WT	Unmethylated	4.2	Glioblastoma, IDH-wildtype. Grade 4.
TCGA-28-5208	52	glioblastoma	G4	WT	No combined CNA	unknown	WT	1	-2	-2	non-codel	WT	Methylated	4.2	Glioblastoma, IDH-wildtype. Grade 4.
TCGA-19-5947	47	glioblastoma	G4	WT	Gain chr 7 & loss chr 10	unknown	WT	1	-2	-2	non-codel	WT	Unmethylated	4.1	Glioblastoma, IDH-wildtype. Grade 4.
TCGA-19-5950	52	glioblastoma	G4	WT	Gain chr 7 & loss chr 10	unknown	WT	2	-1	-1	non-codel	WT	Methylated	4.1	Glioblastoma, IDH-wildtype. Grade 4.
TCGA-19-5951	76	glioblastoma	G4	WT	No combined CNA	unknown	WT	2	-2	-2	non-codel	WT	Unmethylated	4.1	Glioblastoma, IDH-wildtype. Grade 4.
TCGA-19-5952	62	glioblastoma	G4	WT	Gain chr 7 & loss chr 10	unknown	WT	2	-2	-2	non-codel	WT	Unmethylated	4.1	Glioblastoma, IDH-wildtype. Grade 4.
TCGA-19-5953	58	glioblastoma	G4	WT	Gain chr 7 & loss chr 10	unknown	WT	1	-2	-2	non-codel	WT	Methylated	4.1	Glioblastoma, IDH-wildtype. Grade 4.
TCGA-19-5954	72	glioblastoma	G4	WT	Gain chr 7 & loss chr 10	unknown	WT	2	-2	-2	non-codel	WT	Methylated	4.1	Glioblastoma, IDH-wildtype. Grade 4.
TCGA-28-5216	52	glioblastoma	G4	WT	No combined CNA	unknown	WT	0	-2	-2	non-codel	WT	Unmethylated	4.2	Glioblastoma, IDH-wildtype. Grade 4.
TCGA-06-6698	53	glioblastoma	G4	WT	No combined CNA	unknown	WT	1	0	0	non-codel	WT	Unmethylated	4.2	Glioblastoma, IDH-wildtype. Grade 4.
TCGA-32-2616	48	glioblastoma	G4	WT (maf)	No combined CNA	unknown	unknown	1	0	0	non-codel	WT	Methylated	4.2	Glioblastoma, IDH-wildtype. Grade 4.
TCGA-19-5959	77	glioblastoma	G4	WT	Gain chr 7 & loss chr 10	unknown	WT	2	-2	-2	non-codel	WT	Methylated	4.1	Glioblastoma, IDH-wildtype. Grade 4.
TCGA-19-5960	56	glioblastoma	G4	WT	Gain chr 7 & loss chr 10	Mutant	WT	1	0	0	non-codel	WT	Unmethylated	4.1	Glioblastoma, IDH-wildtype. Grade 4.
TCGA-19-A60I	39	glioblastoma	G4	WT	Gain chr 7 & loss chr 10	unknown	WT	2	0	0	non-codel	WT	Methylated	4.1	Glioblastoma, IDH-wildtype. Grade 4.
TCGA-19-A6J4	68	glioblastoma	G4	WT	Gain chr 7 & loss chr 10	unknown	WT	1	-1	-1	non-codel	WT	Unmethylated	4.1	Glioblastoma, IDH-wildtype. Grade 4.
TCGA-19-A6J5	40	glioblastoma	G4	Mutant	Gain chr 7 & loss chr 10	unknown	Mutant	1	-1	-1	non-codel	WT	Methylated	4.5	Astrocytoma, IDH-mutant. Grade 4.
TCGA-26-1438	36	glioblastoma	G4	unknown	No combined CNA	unknown	unknown	1	0	0	non-codel	unknown	Unmethylated	4.8	NA. Grade NA.
TCGA-26-1439	63	glioblastoma	G4	WT	Gain chr 7 & loss chr 10	unknown	WT	2	-2	-2	non-codel	WT	Unmethylated	4.1	Glioblastoma, IDH-wildtype. Grade 4.
TCGA-26-1440	48	glioblastoma	G4	unknown	Gain chr 7 & loss chr 10	unknown	unknown	2	-1	-1	non-codel	unknown	Unmethylated	4.8	NA. Grade NA.
TCGA-26-1442	43	glioblastoma	G4	Mutant	No combined CNA	unknown	WT	0	-1	-1	non-codel	WT	Methylated	4.5	Astrocytoma, IDH-mutant. Grade 4.
TCGA-26-1443	60	glioblastoma	G4	unknown	No combined CNA	unknown	unknown	2	-2	-2	non-codel	unknown	Methylated	4.8	NA. Grade NA.
TCGA-26-1799	68	glioblastoma	G4	WT	Gain chr 7 & loss chr 10	unknown	unknown	2	-1	-1	non-codel	WT	Unmethylated	4.1	Glioblastoma, IDH-wildtype. Grade 4.
TCGA-26-5132	74	glioblastoma	G4	WT	Gain chr 7 & loss chr 10	Mutant	WT	2	0	0	non-codel	WT	Methylated	4.1	Glioblastoma, IDH-wildtype. Grade 4.
TCGA-06-0130	54	glioblastoma	G4	WT	No combined CNA	unknown	WT	1	1	1	non-codel	WT	Unmethylated	4.2	Glioblastoma, IDH-wildtype. Grade 4.
TCGA-4W-AA9T	54	glioblastoma	G4	WT	unknown	unknown	Mutant	unknown	unknown	unknown	non-codel	WT	Methylated	4.2	Glioblastoma, IDH-wildtype. Grade 4.
TCGA-26-5135	72	glioblastoma	G4	WT	Gain chr 7 & loss chr 10	Mutant	WT	1	0	0	non-codel	WT	Methylated	4.1	Glioblastoma, IDH-wildtype. Grade 4.
TCGA-26-5136	78	glioblastoma	G4	WT	Gain chr 7 & loss chr 10	unknown	WT	1	1	1	non-codel	WT	Methylated	4.1	Glioblastoma, IDH-wildtype. Grade 4.
TCGA-26-5139	65	glioblastoma	G4	WT	Gain chr 7 & loss chr 10	unknown	WT	2	-2	-2	non-codel	WT	Unmethylated	4.1	Glioblastoma, IDH-wildtype. Grade 4.
TCGA-26-6173	57	glioblastoma	G4	WT	No combined CNA	unknown	WT	2	0	0	non-codel	WT	Unmethylated	4.1	Glioblastoma, IDH-wildtype. Grade 4.
TCGA-06-0213	55	glioblastoma	G4	WT	No combined CNA	unknown	Mutant	1	0	0	non-codel	WT	unknown	4.2	Glioblastoma, IDH-wildtype. Grade 4.
TCGA-19-1790	56	glioblastoma	G4	WT	unknown	unknown	WT	unknown	unknown	unknown	unknown	WT	Unmethylated	4.2	Glioblastoma, IDH-wildtype. Grade 4.
TCGA-27-1830	57	glioblastoma	G4	WT	Gain chr 7 & loss chr 10	unknown	WT	1	-2	-2	non-codel	WT	Unmethylated	4.1	Glioblastoma, IDH-wildtype. Grade 4.
TCGA-27-1831	66	glioblastoma	G4	WT	Gain chr 7 & loss chr 10	Mutant	WT	2	-1	-1	non-codel	WT	Unmethylated	4.1	Glioblastoma, IDH-wildtype. Grade 4.
TCGA-27-1832	59	glioblastoma	G4	WT	Gain chr 7 & loss chr 10	unknown	WT	2	-1	-1	non-codel	WT	Unmethylated	4.1	Glioblastoma, IDH-wildtype. Grade 4.
TCGA-27-1833	67	glioblastoma	G4	WT	Gain chr 7 & loss chr 10	unknown	WT	2	-2	-2	non-codel	WT	Unmethylated	4.1	Glioblastoma, IDH-wildtype. Grade 4.
TCGA-27-1834	56	glioblastoma	G4	WT	Gain chr 7 & loss chr 10	unknown	WT	1	-2	-2	non-codel	WT	Methylated	4.1	Glioblastoma, IDH-wildtype. Grade 4.
TCGA-27-1835	53	glioblastoma	G4	WT	Gain chr 7 & loss chr 10	unknown	WT	1	0	0	non-codel	WT	Methylated	4.1	Glioblastoma, IDH-wildtype. Grade 4.
TCGA-27-1836	33	glioblastoma	G4	WT	No combined CNA	unknown	WT	2	-2	-2	non-codel	WT	Methylated	4.1	Glioblastoma, IDH-wildtype. Grade 4.
TCGA-27-1837	36	glioblastoma	G4	WT	No combined CNA	unknown	WT	2	-2	-2	non-codel	WT	Methylated	4.1	Glioblastoma, IDH-wildtype. Grade 4.
TCGA-27-1838	59	glioblastoma	G4	WT	Gain chr 7 & loss chr 10	unknown	WT	2	1	1	non-codel	WT	Unmethylated	4.1	Glioblastoma, IDH-wildtype. Grade 4.
TCGA-27-2518	52	glioblastoma	G4	WT	Gain chr 7 & loss chr 10	unknown	WT	2	0	0	non-codel	WT	Unmethylated	4.1	Glioblastoma, IDH-wildtype. Grade 4.
TCGA-27-2519	48	glioblastoma	G4	WT	Gain chr 7 & loss chr 10	unknown	WT	1	0	0	non-codel	WT	Unmethylated	4.1	Glioblastoma, IDH-wildtype. Grade 4.
TCGA-27-2521	34	glioblastoma	G4	Mutant	No combined CNA	unknown	Mutant	0	-2	-2	non-codel	WT	Methylated	4.5	Astrocytoma, IDH-mutant. Grade 4.
TCGA-27-2523	63	glioblastoma	G4	WT	Gain chr 7 & loss chr 10	Mutant	WT	2	-2	-2	non-codel	WT	Methylated	4.1	Glioblastoma, IDH-wildtype. Grade 4.
TCGA-27-2524	56	glioblastoma	G4	WT	Gain chr 7 & loss chr 10	unknown	WT	1	-2	-2	non-codel	WT	Unmethylated	4.1	Glioblastoma, IDH-wildtype. Grade 4.
TCGA-27-2526	79	glioblastoma	G4	WT	No combined CNA	unknown	WT	2	-1	-1	non-codel	WT	Unmethylated	4.1	Glioblastoma, IDH-wildtype. Grade 4.
TCGA-19-5958	56	glioblastoma	G4	WT	No combined CNA	unknown	WT	1	-2	-2	non-codel	WT	Unmethylated	4.2	Glioblastoma, IDH-wildtype. Grade 4.
TCGA-27-2528	62	glioblastoma	G4	WT	No combined CNA	Mutant	WT	2	-2	-2	non-codel	WT	Methylated	4.1	Glioblastoma, IDH-wildtype. Grade 4.
TCGA-DU-A7TB	56	oligodendroglioma	G2	WT	No combined CNA	unknown	WT	0	0	0	non-codel	WT	Unmethylated	1.11	NA. Grade NA.
TCGA-28-1746	77	glioblastoma	G4	WT	Gain chr 7 & loss chr 10	unknown	unknown	1	0	0	non-codel	WT	Methylated	4.1	Glioblastoma, IDH-wildtype. Grade 4.
TCGA-28-1747	44	glioblastoma	G4	WT	No combined CNA	unknown	WT	2	-2	-2	non-codel	WT	Methylated	4.1	Glioblastoma, IDH-wildtype. Grade 4.
TCGA-28-1749	73	glioblastoma	G4	WT	Gain chr 7 & loss chr 10	unknown	unknown	2	-2	-2	non-codel	WT	Unmethylated	4.1	Glioblastoma, IDH-wildtype. Grade 4.
TCGA-28-1750	40	glioblastoma	G4	WT	Gain chr 7 & loss chr 10	unknown	unknown	1	-2	-2	non-codel	WT	Unmethylated	4.1	Glioblastoma, IDH-wildtype. Grade 4.
TCGA-28-1751	61	glioblastoma	G4	WT	Gain chr 7 & loss chr 10	unknown	unknown	1	-2	-2	non-codel	WT	Unmethylated	4.1	Glioblastoma, IDH-wildtype. Grade 4.
TCGA-28-1752	42	glioblastoma	G4	WT	Gain chr 7 & loss chr 10	unknown	unknown	2	0	0	non-codel	WT	Methylated	4.1	Glioblastoma, IDH-wildtype. Grade 4.
TCGA-28-1753	53	glioblastoma	G4	WT	Gain chr 7 & loss chr 10	unknown	WT	2	-2	-2	non-codel	WT	Unmethylated	4.1	Glioblastoma, IDH-wildtype. Grade 4.
TCGA-28-1755	52	glioblastoma	G4	WT	No combined CNA	unknown	unknown	2	-2	-2	non-codel	WT	Unmethylated	4.1	Glioblastoma, IDH-wildtype. Grade 4.
TCGA-28-1756	78	glioblastoma	G4	unknown	No combined CNA	unknown	unknown	0	-1	-1	non-codel	unknown	Methylated	4.8	NA. Grade NA.
TCGA-28-1757	71	glioblastoma	G4	WT	Gain chr 7 & loss chr 10	unknown	unknown	2	-2	-2	non-codel	WT	Methylated	4.1	Glioblastoma, IDH-wildtype. Grade 4.
TCGA-12-1092	58	glioblastoma	G4	WT	No combined CNA	unknown	unknown	1	-1	-1	non-codel	WT	Methylated	4.2	Glioblastoma, IDH-wildtype. Grade 4.
TCGA-76-4927	58	glioblastoma	G4	WT	unknown	unknown	WT	unknown	unknown	unknown	unknown	WT	Unmethylated	4.2	Glioblastoma, IDH-wildtype. Grade 4.
TCGA-28-2501		unknown	unknown	WT	Gain chr 7 & loss chr 10	unknown	WT	1	-2	-2	non-codel	WT	Methylated	5.1	NA. Grade NA.
TCGA-28-2502	65	glioblastoma	G4	WT	Gain chr 7 & loss chr 10	unknown	WT	1	-2	-2	non-codel	WT	Unmethylated	4.1	Glioblastoma, IDH-wildtype. Grade 4.
TCGA-28-2506	63	glioblastoma	G4	WT	Gain chr 7 & loss chr 10	unknown	unknown	2	-2	-2	non-codel	WT	Methylated	4.1	Glioblastoma, IDH-wildtype. Grade 4.
TCGA-28-2509	77	glioblastoma	G4	WT	Gain chr 7 & loss chr 10	unknown	WT	1	1	1	non-codel	WT	Methylated	4.1	Glioblastoma, IDH-wildtype. Grade 4.
TCGA-VM-A8CD	58	astrocytoma	G3	WT	No combined CNA	unknown	WT	0	-2	-2	non-codel	WT	Unmethylated	2.9	NA. Grade NA.
TCGA-28-2512	37	glioblastoma	G4	unknown	unknown	unknown	unknown	unknown	unknown	unknown	unknown	unknown	Unmethylated	4.8	NA. Grade NA.
TCGA-28-2513	69	glioblastoma	G4	WT	Gain chr 7 & loss chr 10	unknown	WT	2	-2	-2	non-codel	WT	Unmethylated	4.1	Glioblastoma, IDH-wildtype. Grade 4.
TCGA-28-2514	45	glioblastoma	G4	WT	No combined CNA	unknown	WT	2	-1	-1	non-codel	WT	Unmethylated	4.1	Glioblastoma, IDH-wildtype. Grade 4.
TCGA-28-5204	72	glioblastoma	G4	WT	Gain chr 7 & loss chr 10	unknown	WT	2	-2	-2	non-codel	WT	Unmethylated	4.1	Glioblastoma, IDH-wildtype. Grade 4.
TCGA-28-5207	71	glioblastoma	G4	WT	Gain chr 7 & loss chr 10	unknown	WT	1	0	0	non-codel	WT	Unmethylated	4.1	Glioblastoma, IDH-wildtype. Grade 4.
TCGA-26-5133	59	glioblastoma	G4	WT	No combined CNA	unknown	WT	0	0	0	non-codel	WT	Unmethylated	4.2	Glioblastoma, IDH-wildtype. Grade 4.
TCGA-28-5209	66	glioblastoma	G4	WT	Gain chr 7 & loss chr 10	unknown	WT	2	-2	-2	non-codel	WT	Methylated	4.1	Glioblastoma, IDH-wildtype. Grade 4.
TCGA-28-5211	42	glioblastoma	G4	WT	Gain chr 7 & loss chr 10	unknown	WT	2	-2	-2	non-codel	WT	Unmethylated	4.1	Glioblastoma, IDH-wildtype. Grade 4.
TCGA-28-5213	72	glioblastoma	G4	WT	Gain chr 7 & loss chr 10	unknown	WT	1	-1	-1	non-codel	WT	Unmethylated	4.1	Glioblastoma, IDH-wildtype. Grade 4.
TCGA-28-5214	53	glioblastoma	G4	WT	Gain chr 7 & loss chr 10	unknown	WT	2	0	0	non-codel	WT	Unmethylated	4.1	Glioblastoma, IDH-wildtype. Grade 4.
TCGA-28-2499	59	glioblastoma	G4	WT	unknown	unknown	WT	unknown	unknown	unknown	unknown	WT	Unmethylated	4.2	Glioblastoma, IDH-wildtype. Grade 4.
TCGA-14-0862	60	glioblastoma	G4	WT	No combined CNA	unknown	WT	0	-2	-2	non-codel	WT	Methylated	4.2	Glioblastoma, IDH-wildtype. Grade 4.
TCGA-02-0055	62	glioblastoma	G4	WT	No combined CNA	unknown	WT	1	0	0	non-codel	WT	Unmethylated	4.2	Glioblastoma, IDH-wildtype. Grade 4.
TCGA-28-5219	47	glioblastoma	G4	WT	Gain chr 7 & loss chr 10	unknown	WT	1	0	0	non-codel	WT	Methylated	4.1	Glioblastoma, IDH-wildtype. Grade 4.
TCGA-28-5220	67	glioblastoma	G4	WT	Gain chr 7 & loss chr 10	unknown	WT	1	-2	-2	non-codel	WT	Unmethylated	4.1	Glioblastoma, IDH-wildtype. Grade 4.
TCGA-28-6450	60	glioblastoma	G4	WT	Gain chr 7 & loss chr 10	unknown	WT	2	-2	-2	non-codel	WT	Unmethylated	4.1	Glioblastoma, IDH-wildtype. Grade 4.
TCGA-32-1970	59	glioblastoma	G4	WT	Gain chr 7 & loss chr 10	Mutant	WT	1	-1	-1	non-codel	WT	Unmethylated	4.1	Glioblastoma, IDH-wildtype. Grade 4.
TCGA-32-1973	21	glioblastoma	G4	unknown	No combined CNA	unknown	unknown	0	-1	-1	non-codel	unknown	Methylated	4.8	NA. Grade NA.
TCGA-32-1976	65	glioblastoma	G4	WT	Gain chr 7 & loss chr 10	unknown	unknown	1	-2	-2	non-codel	WT	Methylated	4.1	Glioblastoma, IDH-wildtype. Grade 4.
TCGA-32-1977	63	glioblastoma	G4	WT	Gain chr 7 & loss chr 10	unknown	WT	2	-2	-2	non-codel	WT	Methylated	4.1	Glioblastoma, IDH-wildtype. Grade 4.
TCGA-32-1978	57	glioblastoma	G4	unknown	Gain chr 7 & loss chr 10	unknown	unknown	2	-2	-2	non-codel	unknown	Unmethylated	4.8	NA. Grade NA.
TCGA-32-1979	69	glioblastoma	G4	WT	Gain chr 7 & loss chr 10	unknown	WT	2	-2	-2	non-codel	WT	Unmethylated	4.1	Glioblastoma, IDH-wildtype. Grade 4.
TCGA-06-0141	62	glioblastoma	G4	WT	No combined CNA	unknown	WT	1	-1	-1	non-codel	WT	Unmethylated	4.2	Glioblastoma, IDH-wildtype. Grade 4.
TCGA-32-1982	76	glioblastoma	G4	WT	Gain chr 7 & loss chr 10	unknown	WT	2	-2	-2	non-codel	WT	Methylated	4.1	Glioblastoma, IDH-wildtype. Grade 4.
TCGA-12-1597	62	glioblastoma	G4	WT	unknown	unknown	WT	unknown	unknown	unknown	unknown	WT	Unmethylated	4.2	Glioblastoma, IDH-wildtype. Grade 4.
TCGA-32-1987	49	glioblastoma	G4	unknown	Gain chr 7 & loss chr 10	unknown	unknown	1	0	0	non-codel	unknown	Unmethylated	4.8	NA. Grade NA.
TCGA-32-1991	60	glioblastoma	G4	WT	No combined CNA	unknown	WT	2	-2	-2	non-codel	WT	Unmethylated	4.1	Glioblastoma, IDH-wildtype. Grade 4.
TCGA-32-2491	63	glioblastoma	G4	WT	Gain chr 7 & loss chr 10	unknown	WT	1	0	0	non-codel	WT	Unmethylated	4.1	Glioblastoma, IDH-wildtype. Grade 4.
TCGA-32-2494	58	glioblastoma	G4	WT	Gain chr 7 & loss chr 10	unknown	WT	2	-2	-2	non-codel	WT	Methylated	4.1	Glioblastoma, IDH-wildtype. Grade 4.
TCGA-32-2495	59	glioblastoma	G4	WT	No combined CNA	unknown	WT	2	-2	-2	non-codel	WT	Unmethylated	4.1	Glioblastoma, IDH-wildtype. Grade 4.
TCGA-32-2498		unknown	unknown	WT	unknown	unknown	unknown	unknown	unknown	unknown	unknown	unknown	Unmethylated	5.1	NA. Grade NA.
TCGA-32-2615	62	glioblastoma	G4	WT	No combined CNA	unknown	WT	2	-2	-2	non-codel	WT	Unmethylated	4.1	Glioblastoma, IDH-wildtype. Grade 4.
TCGA-28-5215	62	glioblastoma	G4	WT	No combined CNA	unknown	WT	1	-2	-1	non-codel	WT	Methylated	4.2	Glioblastoma, IDH-wildtype. Grade 4.
TCGA-32-2632	80	glioblastoma	G4	WT	No combined CNA	unknown	WT	2	0	0	non-codel	WT	Unmethylated	4.1	Glioblastoma, IDH-wildtype. Grade 4.
TCGA-HT-8107	62	oligodendroglioma	G2	WT	No combined CNA	WT	WT	0	0	0	non-codel	WT	Methylated	1.11	NA. Grade NA.
TCGA-32-2638	67	glioblastoma	G4	WT	Gain chr 7 & loss chr 10	unknown	WT	2	-1	-1	non-codel	WT	Methylated	4.1	Glioblastoma, IDH-wildtype. Grade 4.
TCGA-32-4208	25	glioblastoma	G4	Mutant	No combined CNA	unknown	Mutant	0	-1	-1	non-codel	WT	Methylated	4.5	Astrocytoma, IDH-mutant. Grade 4.
TCGA-19-1390	63	glioblastoma	G4	WT	No combined CNA	unknown	WT	1	-2	-2	non-codel	WT	Methylated	4.2	Glioblastoma, IDH-wildtype. Grade 4.
TCGA-32-4210	73	glioblastoma	G4	WT	Gain chr 7 & loss chr 10	unknown	WT	1	-2	-2	non-codel	WT	Unmethylated	4.1	Glioblastoma, IDH-wildtype. Grade 4.
TCGA-32-4211	56	glioblastoma	G4	WT	Gain chr 7 & loss chr 10	unknown	WT	1	-1	-1	non-codel	WT	Unmethylated	4.1	Glioblastoma, IDH-wildtype. Grade 4.
TCGA-32-4213	47	glioblastoma	G4	WT	No combined CNA	unknown	WT	2	-2	-2	non-codel	WT	Methylated	4.1	Glioblastoma, IDH-wildtype. Grade 4.
TCGA-32-4719	73	glioblastoma	G4	WT	No combined CNA	unknown	WT	2	-1	-1	non-codel	WT	Unmethylated	4.1	Glioblastoma, IDH-wildtype. Grade 4.
TCGA-32-5222	66	glioblastoma	G4	WT	Gain chr 7 & loss chr 10	unknown	WT	1	-2	-2	non-codel	WT	Methylated	4.1	Glioblastoma, IDH-wildtype. Grade 4.
TCGA-41-2571	89	glioblastoma	G4	WT	Gain chr 7 & loss chr 10	unknown	WT	1	0	0	non-codel	WT	Unmethylated	4.1	Glioblastoma, IDH-wildtype. Grade 4.
TCGA-41-2572	67	glioblastoma	G4	WT	Gain chr 7 & loss chr 10	unknown	WT	2	-1	-1	non-codel	WT	Unmethylated	4.1	Glioblastoma, IDH-wildtype. Grade 4.
TCGA-41-2573	59	glioblastoma	G4	WT	Gain chr 7 & loss chr 10	unknown	WT	1	-1	-1	non-codel	WT	Methylated	4.1	Glioblastoma, IDH-wildtype. Grade 4.
TCGA-41-2575	75	glioblastoma	G4	WT	Gain chr 7 & loss chr 10	unknown	WT	2	-2	-2	non-codel	WT	Unmethylated	4.1	Glioblastoma, IDH-wildtype. Grade 4.
TCGA-41-3392	88	glioblastoma	G4	WT	Gain chr 7 & loss chr 10	unknown	WT	2	-2	-2	non-codel	WT	Unmethylated	4.1	Glioblastoma, IDH-wildtype. Grade 4.
TCGA-41-3393	81	glioblastoma	G4	WT	Gain chr 7 & loss chr 10	unknown	WT	2	-2	-2	non-codel	WT	Unmethylated	4.1	Glioblastoma, IDH-wildtype. Grade 4.
TCGA-41-3915	48	glioblastoma	G4	WT	Gain chr 7 & loss chr 10	unknown	WT	1	1	1	non-codel	WT	Methylated	4.1	Glioblastoma, IDH-wildtype. Grade 4.
TCGA-28-5218	63	glioblastoma	G4	WT	No combined CNA	unknown	WT	1	-2	0	non-codel	WT	Unmethylated	4.2	Glioblastoma, IDH-wildtype. Grade 4.
TCGA-41-5651	59	glioblastoma	G4	WT	Gain chr 7 & loss chr 10	Mutant	WT	1	0	0	non-codel	WT	Methylated	4.1	Glioblastoma, IDH-wildtype. Grade 4.
TCGA-41-6646	73	glioblastoma	G4	WT	Gain chr 7 & loss chr 10	unknown	WT	1	-1	-1	non-codel	WT	Methylated	4.1	Glioblastoma, IDH-wildtype. Grade 4.
TCGA-41-4097	63	glioblastoma	G4	WT	No combined CNA	unknown	WT	0	-2	-2	non-codel	WT	Unmethylated	4.2	Glioblastoma, IDH-wildtype. Grade 4.
TCGA-TM-A84J	63	oligodendroglioma	G3	WT	No combined CNA	unknown	WT	0	-1	-1	non-codel	WT	Unmethylated	1.12	NA. Grade NA.
TCGA-06-A7TK	64	glioblastoma	G4	WT	unknown	unknown	WT	unknown	unknown	unknown	non-codel	WT	Methylated	4.2	Glioblastoma, IDH-wildtype. Grade 4.
TCGA-74-6573	67	glioblastoma	G4	WT	Gain chr 7 & loss chr 10	unknown	WT	2	-2	-2	non-codel	WT	Unmethylated	4.1	Glioblastoma, IDH-wildtype. Grade 4.
TCGA-74-6575	73	glioblastoma	G4	WT	Gain chr 7 & loss chr 10	unknown	Mutant	1	-2	-2	non-codel	WT	Unmethylated	4.1	Glioblastoma, IDH-wildtype. Grade 4.
TCGA-74-6577	51	glioblastoma	G4	WT	Gain chr 7 & loss chr 10	unknown	WT	1	-2	-2	non-codel	WT	Unmethylated	4.1	Glioblastoma, IDH-wildtype. Grade 4.
TCGA-74-6578	58	glioblastoma	G4	WT	Gain chr 7 & loss chr 10	unknown	WT	1	-2	-2	non-codel	WT	Methylated	4.1	Glioblastoma, IDH-wildtype. Grade 4.
TCGA-74-6581	77	glioblastoma	G4	WT (maf)	Gain chr 7 & loss chr 10	unknown	unknown	2	-2	-2	non-codel	WT	Unmethylated	4.1	Glioblastoma, IDH-wildtype. Grade 4.
TCGA-74-6584	55	glioblastoma	G4	WT	Gain chr 7 & loss chr 10	unknown	WT	2	-2	-2	non-codel	WT	Unmethylated	4.1	Glioblastoma, IDH-wildtype. Grade 4.
TCGA-76-4925	76	glioblastoma	G4	WT	Gain chr 7 & loss chr 10	unknown	WT	1	-2	-2	non-codel	WT	Methylated	4.1	Glioblastoma, IDH-wildtype. Grade 4.
TCGA-76-4926	68	glioblastoma	G4	WT	Gain chr 7 & loss chr 10	unknown	WT	2	-1	-1	non-codel	WT	Unmethylated	4.1	Glioblastoma, IDH-wildtype. Grade 4.
TCGA-26-6174	65	glioblastoma	G4	WT	No combined CNA	unknown	WT	1	-2	-2	non-codel	WT	Methylated	4.2	Glioblastoma, IDH-wildtype. Grade 4.
TCGA-76-4928	85	glioblastoma	G4	WT	Gain chr 7 & loss chr 10	unknown	WT	1	-2	-2	non-codel	WT	Methylated	4.1	Glioblastoma, IDH-wildtype. Grade 4.
TCGA-76-4929	76	glioblastoma	G4	WT	Gain chr 7 & loss chr 10	unknown	WT	1	-2	-2	non-codel	WT	Methylated	4.1	Glioblastoma, IDH-wildtype. Grade 4.
TCGA-76-4931	70	glioblastoma	G4	WT	Gain chr 7 & loss chr 10	unknown	WT	2	-2	-2	non-codel	WT	Unmethylated	4.1	Glioblastoma, IDH-wildtype. Grade 4.
TCGA-76-4934	66	glioblastoma	G4	WT	No combined CNA	unknown	WT	1	-2	-2	non-codel	WT	Methylated	4.2	Glioblastoma, IDH-wildtype. Grade 4.
TCGA-S9-A6UA	66	astrocytoma	G3	WT	No combined CNA	unknown	Mutant	0	-2	-2	non-codel	WT	Methylated	2.9	NA. Grade NA.
TCGA-76-4935	52	glioblastoma	G4	WT	Gain chr 7 & loss chr 10	unknown	WT	1	-2	-2	non-codel	WT	Methylated	4.1	Glioblastoma, IDH-wildtype. Grade 4.
TCGA-76-6191	57	glioblastoma	G4	WT	Gain chr 7 & loss chr 10	unknown	WT	1	-2	-2	non-codel	WT	Unmethylated	4.1	Glioblastoma, IDH-wildtype. Grade 4.
TCGA-76-6192	74	glioblastoma	G4	WT	Gain chr 7 & loss chr 10	unknown	WT	1	-2	-2	non-codel	WT	Unmethylated	4.1	Glioblastoma, IDH-wildtype. Grade 4.
TCGA-14-0865	67	glioblastoma	G4	WT	No combined CNA	unknown	unknown	0	-2	-2	non-codel	WT	Methylated	4.2	Glioblastoma, IDH-wildtype. Grade 4.
TCGA-76-6280	57	glioblastoma	G4	WT	Gain chr 7 & loss chr 10	unknown	WT	1	-2	-2	non-codel	WT	Methylated	4.1	Glioblastoma, IDH-wildtype. Grade 4.
TCGA-76-6282	63	glioblastoma	G4	WT	Gain chr 7 & loss chr 10	unknown	WT	2	-2	-2	non-codel	WT	Unmethylated	4.1	Glioblastoma, IDH-wildtype. Grade 4.
TCGA-76-6283		unknown	unknown	WT	Gain chr 7 & loss chr 10	unknown	WT	1	0	0	non-codel	WT	Methylated	5.1	NA. Grade NA.
TCGA-76-6285	64	glioblastoma	G4	WT	Gain chr 7 & loss chr 10	unknown	WT	1	-2	-2	non-codel	WT	Unmethylated	4.1	Glioblastoma, IDH-wildtype. Grade 4.
TCGA-76-6286	60	glioblastoma	G4	WT	Gain chr 7 & loss chr 10	unknown	WT	1	0	0	non-codel	WT	Unmethylated	4.1	Glioblastoma, IDH-wildtype. Grade 4.
TCGA-76-6656	66	glioblastoma	G4	WT	No combined CNA	unknown	WT	2	-2	-2	non-codel	WT	Methylated	4.1	Glioblastoma, IDH-wildtype. Grade 4.
TCGA-76-6657	74	glioblastoma	G4	WT	Gain chr 7 & loss chr 10	unknown	WT	1	-2	-2	non-codel	WT	Methylated	4.1	Glioblastoma, IDH-wildtype. Grade 4.
TCGA-76-6660		unknown	unknown	WT	Gain chr 7 & loss chr 10	unknown	WT	1	-2	-2	non-codel	WT	Unmethylated	5.1	NA. Grade NA.
TCGA-76-6661	54	glioblastoma	G4	WT	Gain chr 7 & loss chr 10	unknown	WT	2	-2	-2	non-codel	WT	Unmethylated	4.1	Glioblastoma, IDH-wildtype. Grade 4.
TCGA-76-6662	58	glioblastoma	G4	WT	Gain chr 7 & loss chr 10	unknown	WT	1	0	0	non-codel	WT	Unmethylated	4.1	Glioblastoma, IDH-wildtype. Grade 4.
TCGA-76-6663	44	glioblastoma	G4	WT	Gain chr 7 & loss chr 10	unknown	WT	1	-2	-2	non-codel	WT	Unmethylated	4.1	Glioblastoma, IDH-wildtype. Grade 4.
TCGA-76-6664	49	glioblastoma	G4	WT	Gain chr 7 & loss chr 10	unknown	WT	2	-2	-2	non-codel	WT	Methylated	4.1	Glioblastoma, IDH-wildtype. Grade 4.
TCGA-81-5910	64	glioblastoma	G4	WT	Gain chr 7 & loss chr 10	unknown	WT	2	-2	-2	non-codel	WT	Unmethylated	4.1	Glioblastoma, IDH-wildtype. Grade 4.
TCGA-81-5911	33	glioblastoma	G4	WT	Gain chr 7 & loss chr 10	unknown	WT	2	0	0	non-codel	WT	Unmethylated	4.1	Glioblastoma, IDH-wildtype. Grade 4.
TCGA-87-5896	50	glioblastoma	G4	WT	Gain chr 7 & loss chr 10	unknown	WT	2	-2	-2	non-codel	WT	Unmethylated	4.1	Glioblastoma, IDH-wildtype. Grade 4.
TCGA-CS-4938	31	astrocytoma	G2	Mutant	No combined CNA	WT	Mutant	0	0	0	non-codel	WT	Unmethylated	2.1	Astrocytoma, IDH-mutant. Grade 2.
TCGA-CS-4941	67	astrocytoma	G3	WT	Gain chr 7 & loss chr 10	Mutant	WT	2	0	0	non-codel	WT	Methylated	2.7	Glioblastoma, IDH-wildtype. Grade 4.
TCGA-CS-4942	44	astrocytoma	G3	Mutant	No combined CNA	WT	Mutant	1	0	0	non-codel	WT	Unmethylated	2.2	Astrocytoma, IDH-mutant. Grade 3.
TCGA-CS-4943	37	astrocytoma	G3	Mutant	No combined CNA	WT	Mutant	0	-2	-2	non-codel	WT	Methylated	2.3	Astrocytoma, IDH-mutant. Grade 4.
TCGA-CS-4944	50	astrocytoma	G2	Mutant	No combined CNA	Mutant	WT	0	0	0	non-codel	WT	Methylated	2.1	Astrocytoma, IDH-mutant. Grade 2.
TCGA-CS-5390	47	oligodendroglioma	G2	Mutant	No combined CNA	Mutant	WT	0	0	0	codel	WT	Methylated	1.1	Oligodendroglioma, IDH-mutant, 1p/19q-codeleted. Grade 2.
TCGA-CS-5393	39	astrocytoma	G3	Mutant	No combined CNA	WT	WT	2	-1	-1	non-codel	WT	Methylated	2.2	Astrocytoma, IDH-mutant. Grade 3.
TCGA-CS-5394	40	astrocytoma	G3	Mutant	No combined CNA	WT	WT	0	0	0	non-codel	WT	Methylated	2.2	Astrocytoma, IDH-mutant. Grade 3.
TCGA-CS-5395	43	oligodendroglioma	G2	WT	Gain chr 7 & loss chr 10	Mutant	WT	1	-2	-2	non-codel	WT	Unmethylated	1.10	Glioblastoma, IDH-wildtype. Grade 4.
TCGA-CS-5396	53	oligodendroglioma	G3	Mutant	No combined CNA	Mutant	WT	1	-1	-1	codel	WT	Methylated	1.2	Oligodendroglioma, IDH-mutant, 1p/19q-codeleted. Grade 3.
TCGA-CS-5397	54	astrocytoma	G3	WT	Gain chr 7 & loss chr 10	Mutant	WT	1	-2	-2	non-codel	WT	Unmethylated	2.7	Glioblastoma, IDH-wildtype. Grade 4.
TCGA-CS-6186	58	oligoastrocytoma	G3	WT	Gain chr 7 & loss chr 10	Mutant	WT	1	-2	-2	non-codel	WT	Unmethylated	3.12	Glioblastoma, IDH-wildtype. Grade 4.
TCGA-CS-6188	48	astrocytoma	G3	WT	Gain chr 7 & loss chr 10	Mutant	WT	2	-2	-2	non-codel	WT	Unmethylated	2.7	Glioblastoma, IDH-wildtype. Grade 4.
TCGA-CS-6290	31	astrocytoma	G3	Mutant	No combined CNA	WT	WT	0	0	0	non-codel	WT	Methylated	2.2	Astrocytoma, IDH-mutant. Grade 3.
TCGA-CS-6665	51	astrocytoma	G3	Mutant	No combined CNA	WT	WT	1	1	1	non-codel	WT	Methylated	2.2	Astrocytoma, IDH-mutant. Grade 3.
TCGA-CS-6666	22	astrocytoma	G3	Mutant	No combined CNA	WT	Mutant	0	-1	-1	non-codel	WT	Methylated	2.2	Astrocytoma, IDH-mutant. Grade 3.
TCGA-CS-6667	39	astrocytoma	G2	Mutant	No combined CNA	WT	WT	0	0	0	non-codel	WT	Methylated	2.1	Astrocytoma, IDH-mutant. Grade 2.
TCGA-CS-6668	57	oligodendroglioma	G2	Mutant	No combined CNA	Mutant	WT	0	0	0	codel	WT	Methylated	1.1	Oligodendroglioma, IDH-mutant, 1p/19q-codeleted. Grade 2.
TCGA-19-4068	68	glioblastoma	G4	WT	unknown	unknown	WT	unknown	unknown	unknown	unknown	WT	Unmethylated	4.2	Glioblastoma, IDH-wildtype. Grade 4.
TCGA-CS-6670	43	oligodendroglioma	G3	Mutant	No combined CNA	unknown	WT	1	-1	-1	codel	WT	Methylated	1.2	Oligodendroglioma, IDH-mutant, 1p/19q-codeleted. Grade 3.
TCGA-DB-5270	38	oligoastrocytoma	G3	Mutant	No combined CNA	unknown	Mutant	1	0	0	non-codel	WT	Methylated	3.2	Astrocytoma, IDH-mutant. Grade 3.
TCGA-DB-5273	33	astrocytoma	G3	Mutant	No combined CNA	WT	Mutant	0	0	0	non-codel	WT	Unmethylated	2.2	Astrocytoma, IDH-mutant. Grade 3.
TCGA-DB-5274	37	oligoastrocytoma	G3	Mutant	No combined CNA	Mutant	WT	0	0	0	codel	WT	Methylated	3.6	Oligodendroglioma, IDH-mutant, 1p/19q-codeleted. Grade 3.
TCGA-DB-5275	36	oligoastrocytoma	G3	Mutant	No combined CNA	WT	Mutant	0	-1	-1	non-codel	WT	Methylated	3.2	Astrocytoma, IDH-mutant. Grade 3.
TCGA-DB-5276	32	oligoastrocytoma	G3	Mutant	No combined CNA	WT	Mutant	0	0	0	non-codel	WT	Methylated	3.2	Astrocytoma, IDH-mutant. Grade 3.
TCGA-DB-5277	34	astrocytoma	G3	Mutant	No combined CNA	WT	WT	1	-1	-1	non-codel	WT	Methylated	2.2	Astrocytoma, IDH-mutant. Grade 3.
TCGA-DB-5278	17	oligodendroglioma	G2	Mutant	No combined CNA	WT	WT	0	0	0	codel	WT	Methylated	1.1	Oligodendroglioma, IDH-mutant, 1p/19q-codeleted. Grade 2.
TCGA-DB-5279	59	oligodendroglioma	G2	Mutant	No combined CNA	Mutant	WT	0	-1	-1	codel	WT	Methylated	1.1	Oligodendroglioma, IDH-mutant, 1p/19q-codeleted. Grade 2.
TCGA-DB-5280	43	oligoastrocytoma	G2	Mutant	No combined CNA	WT	Mutant	0	0	0	non-codel	WT	Methylated	3.1	Astrocytoma, IDH-mutant. Grade 2.
TCGA-DB-5281	61	oligoastrocytoma	G3	Mutant	No combined CNA	WT	Mutant	0	-1	-1	non-codel	WT	Methylated	3.2	Astrocytoma, IDH-mutant. Grade 3.
TCGA-DB-A4X9	33	oligoastrocytoma	G2	Mutant	No combined CNA	WT	WT	1	0	0	non-codel	WT	Methylated	3.1	Astrocytoma, IDH-mutant. Grade 2.
TCGA-DB-A4XA	30	oligoastrocytoma	G2	Mutant	No combined CNA	Mutant	WT	0	0	0	codel	WT	Methylated	3.5	Oligodendroglioma, IDH-mutant, 1p/19q-codeleted. Grade 2.
TCGA-DB-A4XB	38	astrocytoma	G3	Mutant	No combined CNA	WT	WT	0	-1	-1	non-codel	WT	Methylated	2.2	Astrocytoma, IDH-mutant. Grade 3.
TCGA-DB-A4XC	26	oligoastrocytoma	G2	Mutant	No combined CNA	WT	Mutant	0	-1	-1	non-codel	WT	Methylated	3.1	Astrocytoma, IDH-mutant. Grade 2.
TCGA-DB-A4XD	32	astrocytoma	G3	Mutant	No combined CNA	WT	Mutant	0	0	0	non-codel	WT	Methylated	2.2	Astrocytoma, IDH-mutant. Grade 3.
TCGA-DB-A4XE	27	oligoastrocytoma	G3	Mutant	No combined CNA	WT	Mutant	1	1	1	non-codel	WT	Methylated	3.2	Astrocytoma, IDH-mutant. Grade 3.
TCGA-DB-A4XF	41	astrocytoma	G3	Mutant	No combined CNA	WT	WT	0	-1	-1	non-codel	WT	Methylated	2.2	Astrocytoma, IDH-mutant. Grade 3.
TCGA-DB-A4XG	34	oligodendroglioma	G3	Mutant	No combined CNA	Mutant	WT	0	0	0	codel	WT	Methylated	1.2	Oligodendroglioma, IDH-mutant, 1p/19q-codeleted. Grade 3.
TCGA-DB-A4XH	53	oligoastrocytoma	G2	Mutant	No combined CNA	Mutant	WT	0	-1	-1	codel	WT	Methylated	3.5	Oligodendroglioma, IDH-mutant, 1p/19q-codeleted. Grade 2.
TCGA-DB-A64L	67	oligodendroglioma	G2	Mutant	No combined CNA	Mutant	WT	0	-1	-1	codel	WT	Methylated	1.1	Oligodendroglioma, IDH-mutant, 1p/19q-codeleted. Grade 2.
TCGA-DB-A64O	59	oligoastrocytoma	G2	WT	Gain chr 7 & loss chr 10	Mutant	WT	1	0	0	non-codel	WT	Unmethylated	3.12	Glioblastoma, IDH-wildtype. Grade 4.
TCGA-DB-A64P	40	oligodendroglioma	G3	Mutant	No combined CNA	Mutant	WT	0	0	0	codel	WT	Methylated	1.2	Oligodendroglioma, IDH-mutant, 1p/19q-codeleted. Grade 3.
TCGA-DB-A64Q	31	oligoastrocytoma	G2	Mutant	No combined CNA	Mutant	WT	0	0	0	codel	WT	Methylated	3.5	Oligodendroglioma, IDH-mutant, 1p/19q-codeleted. Grade 2.
TCGA-DB-A64R	24	oligodendroglioma	G2	Mutant	No combined CNA	Mutant	WT	0	0	0	codel	WT	Methylated	1.1	Oligodendroglioma, IDH-mutant, 1p/19q-codeleted. Grade 2.
TCGA-DB-A64S	20	oligoastrocytoma	G2	Mutant	No combined CNA	WT	Mutant	0	0	0	non-codel	WT	Unmethylated	3.1	Astrocytoma, IDH-mutant. Grade 2.
TCGA-DB-A64U	38	oligoastrocytoma	G2	Mutant	No combined CNA	Mutant	WT	0	0	0	codel	WT	Methylated	3.5	Oligodendroglioma, IDH-mutant, 1p/19q-codeleted. Grade 2.
TCGA-DB-A64V	54	oligodendroglioma	G2	Mutant	No combined CNA	Mutant	WT	0	-1	-1	codel	WT	Methylated	1.1	Oligodendroglioma, IDH-mutant, 1p/19q-codeleted. Grade 2.
TCGA-DB-A64W	65	oligoastrocytoma	G3	Mutant	No combined CNA	Mutant	WT	0	0	0	codel	WT	Methylated	3.6	Oligodendroglioma, IDH-mutant, 1p/19q-codeleted. Grade 3.
TCGA-DB-A64X	56	astrocytoma	G3	Mutant	No combined CNA	WT	WT	0	0	0	non-codel	WT	Methylated	2.2	Astrocytoma, IDH-mutant. Grade 3.
TCGA-DB-A75K	55	oligoastrocytoma	G3	Mutant	No combined CNA	unknown	WT	0	0	0	codel	WT	Methylated	3.6	Oligodendroglioma, IDH-mutant, 1p/19q-codeleted. Grade 3.
TCGA-DB-A75L	36	astrocytoma	G3	Mutant	No combined CNA	unknown	WT	0	-1	-1	non-codel	WT	Methylated	2.2	Astrocytoma, IDH-mutant. Grade 3.
TCGA-DB-A75M	47	astrocytoma	G2	Mutant	No combined CNA	unknown	Mutant	0	0	0	non-codel	WT	Methylated	2.1	Astrocytoma, IDH-mutant. Grade 2.
TCGA-DB-A75O	29	astrocytoma	G3	Mutant	No combined CNA	unknown	WT	0	0	0	non-codel	WT	Methylated	2.2	Astrocytoma, IDH-mutant. Grade 3.
TCGA-32-1986	68	glioblastoma	G4	WT	No combined CNA	unknown	WT	1	-2	-2	non-codel	WT	Unmethylated	4.2	Glioblastoma, IDH-wildtype. Grade 4.
TCGA-19-1385	69	glioblastoma	G4	WT	No combined CNA	unknown	unknown	1	-1	-1	non-codel	WT	Methylated	4.2	Glioblastoma, IDH-wildtype. Grade 4.
TCGA-DH-5141	32	oligodendroglioma	G3	Mutant	No combined CNA	Mutant	WT	0	0	0	codel	WT	Methylated	1.2	Oligodendroglioma, IDH-mutant, 1p/19q-codeleted. Grade 3.
TCGA-DH-5142	29	astrocytoma	G3	Mutant	No combined CNA	WT	Mutant	2	0	0	non-codel	WT	Methylated	2.2	Astrocytoma, IDH-mutant. Grade 3.
TCGA-DH-5143	30	oligoastrocytoma	G3	Mutant	No combined CNA	WT	WT	0	0	0	non-codel	WT	Methylated	3.2	Astrocytoma, IDH-mutant. Grade 3.
TCGA-DH-5144	56	oligodendroglioma	G3	Mutant	No combined CNA	Mutant	Mutant	0	0	0	codel	WT	Methylated	1.5	NA. Grade NA.
TCGA-DH-A669	70	oligodendroglioma	G3	Mutant	No combined CNA	Mutant	WT	1	0	0	codel	WT	Methylated	1.2	Oligodendroglioma, IDH-mutant, 1p/19q-codeleted. Grade 3.
TCGA-DH-A66B	52	astrocytoma	G3	Mutant	No combined CNA	WT	WT	0	0	0	non-codel	WT	Methylated	2.2	Astrocytoma, IDH-mutant. Grade 3.
TCGA-DH-A66D	43	astrocytoma	G3	Mutant	No combined CNA	unknown	Mutant	0	0	0	non-codel	WT	Methylated	2.2	Astrocytoma, IDH-mutant. Grade 3.
TCGA-DH-A66F	49	oligodendroglioma	G2	Mutant	No combined CNA	Mutant	WT	0	0	0	codel	WT	Methylated	1.1	Oligodendroglioma, IDH-mutant, 1p/19q-codeleted. Grade 2.
TCGA-DH-A66G	49	oligodendroglioma	G3	Mutant	No combined CNA	unknown	Mutant	1	0	0	non-codel	WT	Methylated	1.7	Astrocytoma, IDH-mutant. Grade 3.
TCGA-DH-A7UR	59	oligodendroglioma	G3	Mutant	No combined CNA	unknown	WT	0	-1	-1	codel	WT	Methylated	1.2	Oligodendroglioma, IDH-mutant, 1p/19q-codeleted. Grade 3.
TCGA-DH-A7US	50	oligodendroglioma	G2	Mutant	No combined CNA	unknown	WT	0	0	0	codel	WT	Methylated	1.1	Oligodendroglioma, IDH-mutant, 1p/19q-codeleted. Grade 2.
TCGA-DH-A7UT	30	astrocytoma	G3	Mutant	No combined CNA	unknown	WT	1	0	0	non-codel	WT	Methylated	2.2	Astrocytoma, IDH-mutant. Grade 3.
TCGA-DH-A7UU	43	astrocytoma	G3	Mutant	No combined CNA	unknown	WT	0	0	0	non-codel	WT	Methylated	2.2	Astrocytoma, IDH-mutant. Grade 3.
TCGA-DH-A7UV	49	astrocytoma	G3	Mutant	No combined CNA	unknown	Mutant	1	0	0	non-codel	WT	Methylated	2.2	Astrocytoma, IDH-mutant. Grade 3.
TCGA-DU-5847	34	astrocytoma	G3	WT	No combined CNA	Mutant	WT	0	-2	-2	non-codel	WT	Methylated	2.7	Glioblastoma, IDH-wildtype. Grade 4.
TCGA-DU-5849	48	oligodendroglioma	G2	Mutant	No combined CNA	Mutant	WT	0	0	0	codel	WT	Methylated	1.1	Oligodendroglioma, IDH-mutant, 1p/19q-codeleted. Grade 2.
TCGA-DU-5851	40	oligoastrocytoma	G3	Mutant	No combined CNA	WT	Mutant	0	-1	-1	non-codel	WT	Unmethylated	3.2	Astrocytoma, IDH-mutant. Grade 3.
TCGA-DU-5852	61	oligoastrocytoma	G3	WT	No combined CNA	Mutant	Mutant	2	-2	-2	non-codel	WT	Methylated	3.12	Glioblastoma, IDH-wildtype. Grade 4.
TCGA-DU-5853	29	oligoastrocytoma	G2	Mutant	No combined CNA	WT	Mutant	0	0	0	non-codel	WT	Methylated	3.1	Astrocytoma, IDH-mutant. Grade 2.
TCGA-DU-5854	57	astrocytoma	G3	WT	Gain chr 7 & loss chr 10	Mutant	WT	2	-2	-2	non-codel	WT	Unmethylated	2.7	Glioblastoma, IDH-wildtype. Grade 4.
TCGA-DU-5855	49	oligoastrocytoma	G3	Mutant	No combined CNA	WT	Mutant	0	-1	-1	non-codel	WT	Methylated	3.2	Astrocytoma, IDH-mutant. Grade 3.
TCGA-DU-5870	34	oligodendroglioma	G2	Mutant	No combined CNA	Mutant	WT	0	0	0	codel	WT	Methylated	1.1	Oligodendroglioma, IDH-mutant, 1p/19q-codeleted. Grade 2.
TCGA-DU-5871	37	oligoastrocytoma	G2	Mutant	No combined CNA	WT	Mutant	0	0	0	non-codel	WT	Methylated	3.1	Astrocytoma, IDH-mutant. Grade 2.
TCGA-DU-5872	43	oligoastrocytoma	G2	Mutant	No combined CNA	WT	Mutant	0	0	0	non-codel	WT	Methylated	3.1	Astrocytoma, IDH-mutant. Grade 2.
TCGA-DU-5874	62	oligodendroglioma	G2	Mutant	No combined CNA	Mutant	WT	0	0	0	codel	WT	Methylated	1.1	Oligodendroglioma, IDH-mutant, 1p/19q-codeleted. Grade 2.
TCGA-4W-AA9S	69	glioblastoma	G4	WT	unknown	unknown	WT	unknown	unknown	unknown	non-codel	WT	Methylated	4.2	Glioblastoma, IDH-wildtype. Grade 4.
TCGA-DU-6393	66	oligodendroglioma	G3	Mutant	No combined CNA	Mutant	WT	0	0	0	codel	WT	Methylated	1.2	Oligodendroglioma, IDH-mutant, 1p/19q-codeleted. Grade 3.
TCGA-DU-6394	53	oligodendroglioma	G3	Mutant	No combined CNA	Mutant	WT	0	0	0	codel	WT	Methylated	1.2	Oligodendroglioma, IDH-mutant, 1p/19q-codeleted. Grade 3.
TCGA-DU-6395	31	oligoastrocytoma	G2	Mutant	No combined CNA	unknown	Mutant	1	-1	-1	non-codel	WT	Methylated	3.1	Astrocytoma, IDH-mutant. Grade 2.
TCGA-DU-6396	31	oligoastrocytoma	G3	Mutant	No combined CNA	WT	Mutant	0	0	0	non-codel	WT	Methylated	3.2	Astrocytoma, IDH-mutant. Grade 3.
TCGA-DU-6397	45	oligodendroglioma	G3	Mutant	No combined CNA	Mutant	WT	0	-1	-1	codel	WT	Methylated	1.2	Oligodendroglioma, IDH-mutant, 1p/19q-codeleted. Grade 3.
TCGA-DU-6399	54	oligodendroglioma	G2	Mutant	No combined CNA	WT	Mutant	0	-1	-1	non-codel	WT	Methylated	1.6	Astrocytoma, IDH-mutant. Grade 2.
TCGA-DU-6400	66	oligodendroglioma	G2	Mutant	No combined CNA	Mutant	WT	1	0	0	codel	WT	Methylated	1.1	Oligodendroglioma, IDH-mutant, 1p/19q-codeleted. Grade 2.
TCGA-DU-6401	31	oligodendroglioma	G2	Mutant	No combined CNA	WT	Mutant	0	0	0	non-codel	WT	Methylated	1.6	Astrocytoma, IDH-mutant. Grade 2.
TCGA-DU-6402	52	astrocytoma	G3	WT	Gain chr 7 & loss chr 10	Mutant	WT	1	-2	-2	non-codel	WT	Unmethylated	2.7	Glioblastoma, IDH-wildtype. Grade 4.
TCGA-DU-6403	60	oligoastrocytoma	G3	WT	Gain chr 7 & loss chr 10	Mutant	WT	2	-1	-1	non-codel	WT	Unmethylated	3.12	Glioblastoma, IDH-wildtype. Grade 4.
TCGA-14-0740	70	glioblastoma	G4	WT	No combined CNA	unknown	WT	0	-1	-1	non-codel	WT	Methylated	4.2	Glioblastoma, IDH-wildtype. Grade 4.
TCGA-DU-6405	51	astrocytoma	G3	WT	Gain chr 7 & loss chr 10	Mutant	WT	2	-2	-2	non-codel	WT	Methylated	2.7	Glioblastoma, IDH-wildtype. Grade 4.
TCGA-DU-6406	59	oligoastrocytoma	G3	WT	Gain chr 7 & loss chr 10	unknown	WT	2	-2	-2	non-codel	WT	Unmethylated	3.12	Glioblastoma, IDH-wildtype. Grade 4.
TCGA-DU-6407	35	oligodendroglioma	G2	Mutant	No combined CNA	WT	Mutant	1	-2	-2	non-codel	WT	Methylated	1.8	Astrocytoma, IDH-mutant. Grade 4.
TCGA-DU-6408	23	oligodendroglioma	G3	Mutant	No combined CNA	WT	Mutant	0	0	0	non-codel	WT	Methylated	1.7	Astrocytoma, IDH-mutant. Grade 3.
TCGA-DU-6410	56	oligodendroglioma	G3	Mutant	No combined CNA	Mutant	WT	1	0	0	codel	WT	Methylated	1.2	Oligodendroglioma, IDH-mutant, 1p/19q-codeleted. Grade 3.
TCGA-DU-6542	25	oligoastrocytoma	G3	Mutant	No combined CNA	WT	WT	0	-1	-1	non-codel	WT	Methylated	3.2	Astrocytoma, IDH-mutant. Grade 3.
TCGA-DU-7006	60	astrocytoma	G3	WT	Gain chr 7 & loss chr 10	Mutant	WT	1	-2	-2	non-codel	WT	Methylated	2.7	Glioblastoma, IDH-wildtype. Grade 4.
TCGA-DU-7007	33	astrocytoma	G2	Mutant	No combined CNA	WT	Mutant	0	-1	-1	non-codel	WT	Methylated	2.1	Astrocytoma, IDH-mutant. Grade 2.
TCGA-DU-7008	41	oligodendroglioma	G2	Mutant	No combined CNA	WT	Mutant	0	0	0	non-codel	WT	Methylated	1.6	Astrocytoma, IDH-mutant. Grade 2.
TCGA-DU-7009	32	oligodendroglioma	G2	Mutant	No combined CNA	Mutant	WT	0	0	0	codel	WT	Methylated	1.1	Oligodendroglioma, IDH-mutant, 1p/19q-codeleted. Grade 2.
TCGA-DU-7010	58	astrocytoma	G3	Mutant	No combined CNA	WT	WT	0	1	1	non-codel	WT	Methylated	2.2	Astrocytoma, IDH-mutant. Grade 3.
TCGA-DU-7011	25	oligoastrocytoma	G2	Mutant	No combined CNA	unknown	Mutant	1	0	0	non-codel	WT	Unmethylated	3.1	Astrocytoma, IDH-mutant. Grade 2.
TCGA-DU-7012	74	astrocytoma	G3	WT	Gain chr 7 & loss chr 10	Mutant	WT	1	-2	-2	non-codel	WT	Methylated	2.7	Glioblastoma, IDH-wildtype. Grade 4.
TCGA-DU-7013	59	astrocytoma	G3	WT	Gain chr 7 & loss chr 10	Mutant	WT	2	0	0	non-codel	WT	Unmethylated	2.7	Glioblastoma, IDH-wildtype. Grade 4.
TCGA-DU-7014	59	oligodendroglioma	G2	mutant (maf)	No combined CNA	unknown	unknown	1	-1	-1	non-codel	WT	Methylated	1.6	Astrocytoma, IDH-mutant. Grade 2.
TCGA-DU-7015	41	oligodendroglioma	G2	Mutant	No combined CNA	WT	Mutant	1	-1	-1	non-codel	WT	Methylated	1.6	Astrocytoma, IDH-mutant. Grade 2.
TCGA-DU-7018	57	oligodendroglioma	G3	Mutant	No combined CNA	Mutant	WT	0	-1	-1	codel	WT	Methylated	1.2	Oligodendroglioma, IDH-mutant, 1p/19q-codeleted. Grade 3.
TCGA-DU-7019	39	oligoastrocytoma	G3	Mutant	No combined CNA	WT	WT	0	-1	-1	non-codel	WT	Methylated	3.2	Astrocytoma, IDH-mutant. Grade 3.
TCGA-DU-7290	45	astrocytoma	G3	WT	No combined CNA	Mutant	WT	0	0	0	non-codel	WT	Unmethylated	2.7	Glioblastoma, IDH-wildtype. Grade 4.
TCGA-DU-7292	69	astrocytoma	G3	WT	No combined CNA	WT	WT	2	-2	-2	non-codel	WT	Methylated	2.7	Glioblastoma, IDH-wildtype. Grade 4.
TCGA-DU-7294	53	oligodendroglioma	G2	Mutant	No combined CNA	Mutant	WT	0	0	0	codel	WT	Methylated	1.1	Oligodendroglioma, IDH-mutant, 1p/19q-codeleted. Grade 2.
TCGA-DU-7298	38	astrocytoma	G3	Mutant	No combined CNA	WT	Mutant	0	-1	-1	non-codel	WT	Methylated	2.2	Astrocytoma, IDH-mutant. Grade 3.
TCGA-DU-7299	33	astrocytoma	G3	Mutant	No combined CNA	WT	WT	0	0	0	non-codel	WT	Methylated	2.2	Astrocytoma, IDH-mutant. Grade 3.
TCGA-DU-7300	53	oligodendroglioma	G3	Mutant	No combined CNA	Mutant	WT	0	0	0	codel	WT	Methylated	1.2	Oligodendroglioma, IDH-mutant, 1p/19q-codeleted. Grade 3.
TCGA-DU-7301	53	oligodendroglioma	G2	Mutant	No combined CNA	WT	Mutant	0	-1	-1	non-codel	WT	Methylated	1.6	Astrocytoma, IDH-mutant. Grade 2.
TCGA-DU-7302	48	oligodendroglioma	G3	Mutant	No combined CNA	Mutant	WT	0	-1	-1	codel	WT	Methylated	1.2	Oligodendroglioma, IDH-mutant, 1p/19q-codeleted. Grade 3.
TCGA-DU-7304	43	oligoastrocytoma	G3	Mutant	No combined CNA	WT	Mutant	0	-1	-1	non-codel	WT	Methylated	3.2	Astrocytoma, IDH-mutant. Grade 3.
TCGA-DU-7306	67	oligoastrocytoma	G2	Mutant	No combined CNA	WT	Mutant	0	-1	-1	non-codel	WT	Methylated	3.1	Astrocytoma, IDH-mutant. Grade 2.
TCGA-DU-7309	41	oligodendroglioma	G3	Mutant	No combined CNA	WT	Mutant	0	0	0	non-codel	WT	Methylated	1.7	Astrocytoma, IDH-mutant. Grade 3.
TCGA-DU-8158	57	astrocytoma	G3	WT	No combined CNA	Mutant	WT	0	-2	-2	non-codel	WT	Unmethylated	2.7	Glioblastoma, IDH-wildtype. Grade 4.
TCGA-DU-8161	63	oligoastrocytoma	G3	WT	Gain chr 7 & loss chr 10	Mutant	WT	1	-1	-1	non-codel	WT	Unmethylated	3.12	Glioblastoma, IDH-wildtype. Grade 4.
TCGA-DU-8162	61	oligoastrocytoma	G3	WT	No combined CNA	WT	WT	2	-1	-1	non-codel	WT	Unmethylated	3.12	Glioblastoma, IDH-wildtype. Grade 4.
TCGA-DU-8163	29	oligoastrocytoma	G3	Mutant	No combined CNA	WT	Mutant	1	0	0	non-codel	WT	Unmethylated	3.2	Astrocytoma, IDH-mutant. Grade 3.
TCGA-DU-8164	51	oligodendroglioma	G2	Mutant	No combined CNA	Mutant	WT	0	0	0	codel	WT	Methylated	1.1	Oligodendroglioma, IDH-mutant, 1p/19q-codeleted. Grade 2.
TCGA-DU-8165	60	oligodendroglioma	G3	WT	Gain chr 7 & loss chr 10	Mutant	WT	1	1	1	non-codel	WT	Unmethylated	1.10	Glioblastoma, IDH-wildtype. Grade 4.
TCGA-DU-8166	29	oligoastrocytoma	G2	Mutant	No combined CNA	WT	Mutant	1	0	0	non-codel	WT	Methylated	3.1	Astrocytoma, IDH-mutant. Grade 2.
TCGA-DU-8167	69	oligoastrocytoma	G2	Mutant	No combined CNA	WT	WT	0	0	0	non-codel	WT	Methylated	3.1	Astrocytoma, IDH-mutant. Grade 2.
TCGA-DU-8168	55	oligodendroglioma	G3	Mutant	No combined CNA	Mutant	WT	0	-1	-1	codel	WT	Methylated	1.2	Oligodendroglioma, IDH-mutant, 1p/19q-codeleted. Grade 3.
TCGA-DU-A5TP	33	astrocytoma	G3	Mutant	No combined CNA	WT	Mutant	0	0	0	non-codel	WT	Methylated	2.2	Astrocytoma, IDH-mutant. Grade 3.
TCGA-DU-A5TR	51	oligoastrocytoma	G2	Mutant	No combined CNA	WT	Mutant	1	0	0	non-codel	WT	Methylated	3.1	Astrocytoma, IDH-mutant. Grade 2.
TCGA-DU-A5TS	42	oligodendroglioma	G2	Mutant	No combined CNA	WT	Mutant	0	0	0	non-codel	WT	Methylated	1.6	Astrocytoma, IDH-mutant. Grade 2.
TCGA-DU-A5TT	70	oligodendroglioma	G3	WT	No combined CNA	Mutant	WT	1	1	1	non-codel	WT	Methylated	1.10	Glioblastoma, IDH-wildtype. Grade 4.
TCGA-DU-A5TU	62	astrocytoma	G2	Mutant	No combined CNA	WT	Mutant	1	0	0	non-codel	WT	Methylated	2.1	Astrocytoma, IDH-mutant. Grade 2.
TCGA-DU-A5TW	33	astrocytoma	G3	Mutant	No combined CNA	WT	Mutant	1	0	0	non-codel	WT	Methylated	2.2	Astrocytoma, IDH-mutant. Grade 3.
TCGA-DU-A5TY	46	astrocytoma	G3	WT	Gain chr 7 & loss chr 10	Mutant	WT	1	-1	-1	non-codel	WT	Methylated	2.7	Glioblastoma, IDH-wildtype. Grade 4.
TCGA-DU-A6S2	37	oligodendroglioma	G2	Mutant	No combined CNA	unknown	WT	0	0	0	codel	WT	Methylated	1.1	Oligodendroglioma, IDH-mutant, 1p/19q-codeleted. Grade 2.
TCGA-DU-A6S3	60	oligodendroglioma	G2	Mutant	No combined CNA	unknown	WT	0	0	0	codel	WT	Methylated	1.1	Oligodendroglioma, IDH-mutant, 1p/19q-codeleted. Grade 2.
TCGA-DU-A6S6	35	oligoastrocytoma	G2	Mutant	No combined CNA	unknown	WT	0	0	0	codel	WT	Methylated	3.5	Oligodendroglioma, IDH-mutant, 1p/19q-codeleted. Grade 2.
TCGA-DU-A6S7	27	astrocytoma	G3	Mutant	No combined CNA	unknown	Mutant	0	-1	-1	non-codel	WT	Methylated	2.2	Astrocytoma, IDH-mutant. Grade 3.
TCGA-DU-A6S8	74	oligodendroglioma	G3	Mutant	No combined CNA	unknown	WT	0	-2	-2	codel	WT	Methylated	1.2	Oligodendroglioma, IDH-mutant, 1p/19q-codeleted. Grade 3.
TCGA-DU-A76K	87	oligodendroglioma	G2	WT	Gain chr 7 & loss chr 10	unknown	WT	1	-2	-2	non-codel	WT	Unmethylated	1.10	Glioblastoma, IDH-wildtype. Grade 4.
TCGA-DU-A76L	54	oligodendroglioma	G3	WT	Gain chr 7 & loss chr 10	unknown	WT	2	-2	-2	non-codel	WT	Methylated	1.10	Glioblastoma, IDH-wildtype. Grade 4.
TCGA-DU-A76O	30	astrocytoma	G2	Mutant	No combined CNA	unknown	Mutant	0	1	1	non-codel	WT	Methylated	2.1	Astrocytoma, IDH-mutant. Grade 2.
TCGA-DU-A76R	51	oligodendroglioma	G3	Mutant	No combined CNA	unknown	WT	-1	0	0	codel	WT	Methylated	1.2	Oligodendroglioma, IDH-mutant, 1p/19q-codeleted. Grade 3.
TCGA-DU-A7T6	73	oligodendroglioma	G3	Mutant	No combined CNA	unknown	WT	0	-1	-1	codel	WT	Methylated	1.2	Oligodendroglioma, IDH-mutant, 1p/19q-codeleted. Grade 3.
TCGA-DU-A7T8	35	oligoastrocytoma	G3	Mutant	No combined CNA	unknown	Mutant	0	0	0	non-codel	WT	Methylated	3.2	Astrocytoma, IDH-mutant. Grade 3.
TCGA-DU-A7TA	32	oligodendroglioma	G2	Mutant	No combined CNA	unknown	Mutant	1	-1	-1	non-codel	WT	Methylated	1.6	Astrocytoma, IDH-mutant. Grade 2.
TCGA-S9-A89V	70	astrocytoma	G3	WT	No combined CNA	unknown	Mutant	0	0	0	non-codel	WT	Methylated	2.9	NA. Grade NA.
TCGA-DU-A7TC	32	astrocytoma	G2	Mutant	No combined CNA	unknown	WT	0	0	0	non-codel	WT	Methylated	2.1	Astrocytoma, IDH-mutant. Grade 2.
TCGA-DU-A7TD	52	oligoastrocytoma	G3	WT	Gain chr 7 & loss chr 10	unknown	WT	2	-2	-2	non-codel	WT	Unmethylated	3.12	Glioblastoma, IDH-wildtype. Grade 4.
TCGA-DU-A7TG	40	oligodendroglioma	G2	Mutant	No combined CNA	unknown	WT	0	0	0	non-codel	WT	Methylated	1.6	Astrocytoma, IDH-mutant. Grade 2.
TCGA-DU-A7TI		unknown	unknown	mutant (maf)	No combined CNA	unknown	unknown	0	0	0	non-codel	WT	Methylated	5.1	NA. Grade NA.
TCGA-DU-A7TJ	55	astrocytoma	G3	WT	Gain chr 7 & loss chr 10	unknown	WT	2	-1	-1	non-codel	WT	Methylated	2.7	Glioblastoma, IDH-wildtype. Grade 4.
TCGA-E1-5302	41	astrocytoma	G3	Mutant	No combined CNA	WT	Mutant	0	1	1	non-codel	WT	Methylated	2.2	Astrocytoma, IDH-mutant. Grade 3.
TCGA-E1-5303	38	astrocytoma	G3	Mutant	No combined CNA	WT	Mutant	0	0	0	non-codel	WT	Methylated	2.2	Astrocytoma, IDH-mutant. Grade 3.
TCGA-E1-5304	42	astrocytoma	G3	Mutant	No combined CNA	WT	Mutant	1	-1	-1	non-codel	WT	Unmethylated	2.2	Astrocytoma, IDH-mutant. Grade 3.
TCGA-E1-5305	34	astrocytoma	G3	Mutant	No combined CNA	WT	Mutant	0	0	0	non-codel	WT	Methylated	2.2	Astrocytoma, IDH-mutant. Grade 3.
TCGA-E1-5307	62	astrocytoma	G3	Mutant	No combined CNA	WT	Mutant	0	-1	-1	non-codel	WT	Methylated	2.2	Astrocytoma, IDH-mutant. Grade 3.
TCGA-E1-5311	31	oligodendroglioma	G3	Mutant	No combined CNA	Mutant	WT	0	0	0	codel	WT	Methylated	1.2	Oligodendroglioma, IDH-mutant, 1p/19q-codeleted. Grade 3.
TCGA-E1-5318	42	oligodendroglioma	G2	Mutant	No combined CNA	Mutant	WT	0	0	0	codel	WT	Methylated	1.1	Oligodendroglioma, IDH-mutant, 1p/19q-codeleted. Grade 2.
TCGA-E1-5319	48	oligodendroglioma	G2	Mutant	No combined CNA	Mutant	WT	0	0	0	codel	WT	Methylated	1.1	Oligodendroglioma, IDH-mutant, 1p/19q-codeleted. Grade 2.
TCGA-E1-5322	38	oligoastrocytoma	G2	Mutant	No combined CNA	Mutant	Mutant	1	0	0	non-codel	WT	Methylated	3.1	Astrocytoma, IDH-mutant. Grade 2.
TCGA-E1-A7YD		unknown	unknown	WT	Gain chr 7 & loss chr 10	unknown	WT	2	-1	-1	non-codel	WT	Unmethylated	5.1	NA. Grade NA.
TCGA-E1-A7YE		unknown	unknown	Mutant	No combined CNA	unknown	Mutant	0	-1	-1	non-codel	WT	Unmethylated	5.1	NA. Grade NA.
TCGA-E1-A7YH		unknown	unknown	Mutant	No combined CNA	unknown	Mutant	0	0	0	non-codel	WT	Methylated	5.1	NA. Grade NA.
TCGA-E1-A7YI		unknown	unknown	Mutant	No combined CNA	unknown	Mutant	0	-2	-2	non-codel	WT	Methylated	5.1	NA. Grade NA.
TCGA-E1-A7YJ		unknown	unknown	WT	Gain chr 7 & loss chr 10	unknown	WT	2	-2	-2	non-codel	WT	Unmethylated	5.1	NA. Grade NA.
TCGA-E1-A7YK		unknown	unknown	Mutant	No combined CNA	unknown	Mutant	0	0	0	non-codel	WT	Methylated	5.1	NA. Grade NA.
TCGA-E1-A7YL		unknown	unknown	WT	Gain chr 7 & loss chr 10	unknown	WT	1	-1	0	non-codel	WT	Unmethylated	5.1	NA. Grade NA.
TCGA-E1-A7YM		unknown	unknown	WT	Gain chr 7 & loss chr 10	unknown	WT	1	-1	-1	non-codel	WT	Unmethylated	5.1	NA. Grade NA.
TCGA-E1-A7YN		unknown	unknown	WT	Gain chr 7 & loss chr 10	unknown	WT	1	-1	-2	non-codel	WT	Methylated	5.1	NA. Grade NA.
TCGA-E1-A7YO	45	oligodendroglioma	G3	Mutant	No combined CNA	unknown	WT	0	0	0	codel	WT	Methylated	1.2	Oligodendroglioma, IDH-mutant, 1p/19q-codeleted. Grade 3.
TCGA-E1-A7YQ		unknown	unknown	WT	Gain chr 7 & loss chr 10	unknown	WT	2	-1	-1	non-codel	WT	Unmethylated	5.1	NA. Grade NA.
TCGA-E1-A7YS		unknown	unknown	Mutant	No combined CNA	unknown	WT	0	-1	-1	codel	WT	Methylated	5.1	NA. Grade NA.
TCGA-E1-A7YU		unknown	unknown	Mutant	No combined CNA	unknown	WT	0	0	0	non-codel	WT	Methylated	5.1	NA. Grade NA.
TCGA-E1-A7YV	26	oligoastrocytoma	G3	Mutant	No combined CNA	unknown	Mutant	0	-1	-1	non-codel	WT	Methylated	3.2	Astrocytoma, IDH-mutant. Grade 3.
TCGA-E1-A7YW	28	oligoastrocytoma	G2	Mutant	No combined CNA	unknown	Mutant	0	0	0	non-codel	WT	Methylated	3.1	Astrocytoma, IDH-mutant. Grade 2.
TCGA-E1-A7YY		unknown	unknown	Mutant	No combined CNA	unknown	WT	0	0	0	non-codel	WT	Methylated	5.1	NA. Grade NA.
TCGA-E1-A7Z2		unknown	unknown	WT	Gain chr 7 & loss chr 10	unknown	WT	1	-1	-1	non-codel	WT	Unmethylated	5.1	NA. Grade NA.
TCGA-E1-A7Z3		unknown	unknown	Mutant	No combined CNA	unknown	Mutant	0	-2	-2	non-codel	WT	Methylated	5.1	NA. Grade NA.
TCGA-E1-A7Z4		unknown	unknown	Mutant	No combined CNA	unknown	Mutant	0	0	0	non-codel	WT	Methylated	5.1	NA. Grade NA.
TCGA-E1-A7Z6	41	astrocytoma	G2	Mutant	No combined CNA	unknown	Mutant	0	0	0	non-codel	WT	Methylated	2.1	Astrocytoma, IDH-mutant. Grade 2.
TCGA-EZ-7264	47	oligodendroglioma	G2	Mutant	No combined CNA	Mutant	WT	0	-1	-1	codel	WT	Methylated	1.1	Oligodendroglioma, IDH-mutant, 1p/19q-codeleted. Grade 2.
TCGA-F6-A8O3	34	oligodendroglioma	G2	Mutant	No combined CNA	unknown	WT	0	0	0	codel	WT	Methylated	1.1	Oligodendroglioma, IDH-mutant, 1p/19q-codeleted. Grade 2.
TCGA-F6-A8O4	44	astrocytoma	G2	Mutant	No combined CNA	unknown	Mutant	0	-1	-1	non-codel	WT	Methylated	2.1	Astrocytoma, IDH-mutant. Grade 2.
TCGA-FG-5962	54	oligodendroglioma	G3	Mutant	No combined CNA	Mutant	WT	1	0	0	codel	WT	Methylated	1.2	Oligodendroglioma, IDH-mutant, 1p/19q-codeleted. Grade 3.
TCGA-FG-5963	23	astrocytoma	G3	WT	No combined CNA	WT	Mutant	2	-2	-2	non-codel	WT	Unmethylated	2.7	Glioblastoma, IDH-wildtype. Grade 4.
TCGA-FG-5964	62	oligodendroglioma	G2	Mutant	No combined CNA	Mutant	WT	0	-1	-1	codel	WT	Methylated	1.1	Oligodendroglioma, IDH-mutant, 1p/19q-codeleted. Grade 2.
TCGA-FG-5965	39	oligoastrocytoma	G2	Mutant	No combined CNA	WT	Mutant	0	-2	-2	non-codel	WT	Methylated	3.3	Astrocytoma, IDH-mutant. Grade 4.
TCGA-FG-6688	59	astrocytoma	G3	WT	Gain chr 7 & loss chr 10	Mutant	WT	2	0	0	non-codel	WT	Methylated	2.7	Glioblastoma, IDH-wildtype. Grade 4.
TCGA-FG-6689	30	astrocytoma	G2	Mutant	No combined CNA	unknown	Mutant	0	0	0	non-codel	WT	Methylated	2.1	Astrocytoma, IDH-mutant. Grade 2.
TCGA-FG-6690	70	oligodendroglioma	G2	Mutant	No combined CNA	WT	Mutant	0	-1	-1	non-codel	WT	Methylated	1.6	Astrocytoma, IDH-mutant. Grade 2.
TCGA-FG-6691	23	astrocytoma	G2	Mutant	No combined CNA	WT	Mutant	1	0	0	non-codel	WT	Unmethylated	2.1	Astrocytoma, IDH-mutant. Grade 2.
TCGA-FG-6692	63	oligodendroglioma	G3	WT	Gain chr 7 & loss chr 10	Mutant	WT	2	-1	-1	non-codel	WT	Methylated	1.10	Glioblastoma, IDH-wildtype. Grade 4.
TCGA-FG-7634	28	oligodendroglioma	G2	Mutant	No combined CNA	Mutant	WT	1	0	0	codel	WT	Methylated	1.1	Oligodendroglioma, IDH-mutant, 1p/19q-codeleted. Grade 2.
TCGA-FG-7636	48	astrocytoma	G3	Mutant	No combined CNA	WT	Mutant	0	-1	-1	non-codel	WT	Methylated	2.2	Astrocytoma, IDH-mutant. Grade 3.
TCGA-FG-7637	49	oligoastrocytoma	G2	Mutant	unknown	WT	WT	unknown	unknown	unknown	non-codel	WT	Methylated	3.4	Astrocytoma, IDH-mutant. Grade NA.
TCGA-FG-7638	31	oligodendroglioma	G3	Mutant	No combined CNA	Mutant	Mutant	0	0	0	codel	WT	Methylated	1.5	NA. Grade NA.
TCGA-FG-7641	31	oligodendroglioma	G2	Mutant	No combined CNA	Mutant	WT	0	0	0	codel	WT	Methylated	1.1	Oligodendroglioma, IDH-mutant, 1p/19q-codeleted. Grade 2.
TCGA-FG-7643	49	oligoastrocytoma	G2	WT	No combined CNA	Mutant	WT	1	0	0	non-codel	WT	Methylated	3.12	Glioblastoma, IDH-wildtype. Grade 4.
TCGA-06-5410	72	glioblastoma	G4	WT	No combined CNA	unknown	WT	1	-1	-1	non-codel	WT	Methylated	4.2	Glioblastoma, IDH-wildtype. Grade 4.
TCGA-FG-8182	35	oligodendroglioma	G2	Mutant	No combined CNA	WT	Mutant	1	0	0	non-codel	WT	Methylated	1.6	Astrocytoma, IDH-mutant. Grade 2.
TCGA-FG-8185	37	astrocytoma	G3	Mutant	No combined CNA	WT	Mutant	0	-1	-1	non-codel	WT	Methylated	2.2	Astrocytoma, IDH-mutant. Grade 3.
TCGA-FG-8186	42	oligoastrocytoma	G3	Mutant	No combined CNA	Mutant	WT	0	0	0	codel	WT	Methylated	3.6	Oligodendroglioma, IDH-mutant, 1p/19q-codeleted. Grade 3.
TCGA-FG-8187	31	oligoastrocytoma	G2	Mutant	No combined CNA	Mutant	WT	0	0	0	codel	WT	Methylated	3.5	Oligodendroglioma, IDH-mutant, 1p/19q-codeleted. Grade 2.
TCGA-FG-8188	41	oligoastrocytoma	G2	Mutant	No combined CNA	WT	Mutant	0	0	0	non-codel	WT	Methylated	3.1	Astrocytoma, IDH-mutant. Grade 2.
TCGA-FG-8189	33	oligodendroglioma	G2	Mutant	No combined CNA	WT	WT	0	0	0	non-codel	WT	Methylated	1.6	Astrocytoma, IDH-mutant. Grade 2.
TCGA-FG-8191	30	oligodendroglioma	G3	Mutant	No combined CNA	WT	Mutant	0	0	0	non-codel	WT	Unmethylated	1.7	Astrocytoma, IDH-mutant. Grade 3.
TCGA-FG-A4MT	27	oligodendroglioma	G2	Mutant	No combined CNA	WT	Mutant	0	0	0	non-codel	WT	Methylated	1.6	Astrocytoma, IDH-mutant. Grade 2.
TCGA-FG-A4MU	58	oligoastrocytoma	G3	WT	Gain chr 7 & loss chr 10	Mutant	WT	2	-1	-1	non-codel	WT	Methylated	3.12	Glioblastoma, IDH-wildtype. Grade 4.
TCGA-FG-A4MW	63	oligoastrocytoma	G3	WT	Gain chr 7 & loss chr 10	Mutant	WT	2	-2	-2	non-codel	WT	Methylated	3.12	Glioblastoma, IDH-wildtype. Grade 4.
TCGA-FG-A4MX	47	astrocytoma	G2	Mutant	No combined CNA	WT	Mutant	0	-1	-1	non-codel	WT	Methylated	2.1	Astrocytoma, IDH-mutant. Grade 2.
TCGA-FG-A4MY	44	oligoastrocytoma	G2	Mutant	No combined CNA	WT	Mutant	0	-1	-1	non-codel	WT	Methylated	3.1	Astrocytoma, IDH-mutant. Grade 2.
TCGA-FG-A60J	47	oligoastrocytoma	G2	Mutant	No combined CNA	Mutant	WT	0	0	0	non-codel	WT	Methylated	3.1	Astrocytoma, IDH-mutant. Grade 2.
TCGA-FG-A60K	34	oligoastrocytoma	G2	Mutant	No combined CNA	Mutant	WT	0	0	0	codel	WT	Methylated	3.5	Oligodendroglioma, IDH-mutant, 1p/19q-codeleted. Grade 2.
TCGA-FG-A60L	34	astrocytoma	G2	Mutant	No combined CNA	unknown	WT	0	0	0	non-codel	WT	Methylated	2.1	Astrocytoma, IDH-mutant. Grade 2.
TCGA-FG-A6IZ	60	oligodendroglioma	G2	Mutant	No combined CNA	unknown	WT	0	0	0	codel	WT	Methylated	1.1	Oligodendroglioma, IDH-mutant, 1p/19q-codeleted. Grade 2.
TCGA-FG-A6J1	44	oligodendroglioma	G2	Mutant	No combined CNA	unknown	WT	0	0	0	codel	WT	Methylated	1.1	Oligodendroglioma, IDH-mutant, 1p/19q-codeleted. Grade 2.
TCGA-FG-A6J3	52	astrocytoma	G3	Mutant	No combined CNA	unknown	WT	0	-1	-1	non-codel	WT	Methylated	2.2	Astrocytoma, IDH-mutant. Grade 3.
TCGA-FG-A70Y	20	oligodendroglioma	G2	Mutant	No combined CNA	unknown	Mutant	0	-2	-2	non-codel	WT	Methylated	1.8	Astrocytoma, IDH-mutant. Grade 4.
TCGA-FG-A70Z	53	oligoastrocytoma	G3	WT	Gain chr 7 & loss chr 10	unknown	WT	2	-1	-1	non-codel	WT	Methylated	3.12	Glioblastoma, IDH-wildtype. Grade 4.
TCGA-FG-A710	50	oligodendroglioma	G2	Mutant	No combined CNA	unknown	WT	0	0	0	codel	WT	Methylated	1.1	Oligodendroglioma, IDH-mutant, 1p/19q-codeleted. Grade 2.
TCGA-FG-A711	33	oligodendroglioma	G2	Mutant	No combined CNA	unknown	Mutant	0	-1	-1	non-codel	WT	Unmethylated	1.6	Astrocytoma, IDH-mutant. Grade 2.
TCGA-FG-A713	74	oligoastrocytoma	G2	Mutant	No combined CNA	unknown	Mutant	0	0	0	codel	WT	Methylated	3.8	NA. Grade NA.
TCGA-FG-A87N	37	astrocytoma	G3	Mutant	No combined CNA	unknown	WT	0	-2	-2	non-codel	WT	Methylated	2.3	Astrocytoma, IDH-mutant. Grade 4.
TCGA-FG-A87Q	61	astrocytoma	G3	WT	Gain chr 7 & loss chr 10	unknown	WT	2	-2	-2	non-codel	WT	Methylated	2.7	Glioblastoma, IDH-wildtype. Grade 4.
TCGA-FN-7833	25	oligoastrocytoma	G3	Mutant	No combined CNA	WT	Mutant	0	0	0	non-codel	WT	Methylated	3.2	Astrocytoma, IDH-mutant. Grade 3.
TCGA-HT-7467	54	oligodendroglioma	G2	Mutant	No combined CNA	Mutant	WT	0	0	0	codel	WT	Methylated	1.1	Oligodendroglioma, IDH-mutant, 1p/19q-codeleted. Grade 2.
TCGA-HT-7468	30	oligodendroglioma	G3	Mutant	No combined CNA	Mutant	WT	0	0	0	codel	WT	Methylated	1.2	Oligodendroglioma, IDH-mutant, 1p/19q-codeleted. Grade 3.
TCGA-32-1980	72	glioblastoma	G4	WT	No combined CNA	unknown	WT	1	0	0	non-codel	WT	Unmethylated	4.2	Glioblastoma, IDH-wildtype. Grade 4.
TCGA-HT-7470	37	oligodendroglioma	G3	Mutant	No combined CNA	WT	Mutant	0	-1	-1	non-codel	WT	Methylated	1.7	Astrocytoma, IDH-mutant. Grade 3.
TCGA-HT-7471	37	oligodendroglioma	G3	Mutant	No combined CNA	Mutant	WT	0	-1	-1	codel	WT	Methylated	1.2	Oligodendroglioma, IDH-mutant, 1p/19q-codeleted. Grade 3.
TCGA-HT-7472	38	oligodendroglioma	G2	Mutant	No combined CNA	WT	Mutant	0	0	0	non-codel	WT	Methylated	1.6	Astrocytoma, IDH-mutant. Grade 2.
TCGA-HT-7473	28	oligoastrocytoma	G2	Mutant	No combined CNA	WT	Mutant	1	0	0	non-codel	WT	Unmethylated	3.1	Astrocytoma, IDH-mutant. Grade 2.
TCGA-HT-7474	52	oligoastrocytoma	G2	Mutant	No combined CNA	WT	Mutant	0	1	1	non-codel	WT	Methylated	3.1	Astrocytoma, IDH-mutant. Grade 2.
TCGA-HT-7475	67	oligoastrocytoma	G3	Mutant	No combined CNA	WT	Mutant	0	-1	-1	non-codel	WT	Methylated	3.2	Astrocytoma, IDH-mutant. Grade 3.
TCGA-HT-7476	26	astrocytoma	G2	Mutant	No combined CNA	WT	Mutant	0	-2	-2	non-codel	WT	Methylated	2.3	Astrocytoma, IDH-mutant. Grade 4.
TCGA-HT-7477	62	astrocytoma	G3	Mutant	No combined CNA	WT	Mutant	1	-2	-2	non-codel	WT	Methylated	2.3	Astrocytoma, IDH-mutant. Grade 4.
TCGA-HT-7478	36	astrocytoma	G2	Mutant	No combined CNA	WT	Mutant	0	0	0	non-codel	WT	Unmethylated	2.1	Astrocytoma, IDH-mutant. Grade 2.
TCGA-HT-7479	44	astrocytoma	G3	Mutant	No combined CNA	Mutant	WT	0	0	0	non-codel	WT	Methylated	2.2	Astrocytoma, IDH-mutant. Grade 3.
TCGA-HT-7480	33	oligodendroglioma	G2	Mutant	No combined CNA	Mutant	WT	0	0	0	codel	WT	Methylated	1.1	Oligodendroglioma, IDH-mutant, 1p/19q-codeleted. Grade 2.
TCGA-HT-7481	39	oligodendroglioma	G2	Mutant	No combined CNA	Mutant	WT	0	0	0	codel	WT	Methylated	1.1	Oligodendroglioma, IDH-mutant, 1p/19q-codeleted. Grade 2.
TCGA-HT-7482	18	oligoastrocytoma	G2	Mutant	No combined CNA	WT	Mutant	0	0	0	non-codel	WT	Methylated	3.1	Astrocytoma, IDH-mutant. Grade 2.
TCGA-HT-7483	14	oligoastrocytoma	G2	Mutant	No combined CNA	WT	Mutant	0	0	0	non-codel	WT	Unmethylated	3.1	Astrocytoma, IDH-mutant. Grade 2.
TCGA-HT-7485	42	astrocytoma	G2	Mutant	No combined CNA	WT	Mutant	0	0	0	non-codel	WT	Methylated	2.1	Astrocytoma, IDH-mutant. Grade 2.
TCGA-HT-7601	30	astrocytoma	G3	Mutant	No combined CNA	WT	WT	0	0	0	non-codel	WT	Methylated	2.2	Astrocytoma, IDH-mutant. Grade 3.
TCGA-HT-7602	21	oligodendroglioma	G2	Mutant	No combined CNA	WT	WT	0	0	0	non-codel	WT	Methylated	1.6	Astrocytoma, IDH-mutant. Grade 2.
TCGA-HT-7603	29	oligodendroglioma	G2	Mutant	No combined CNA	WT	Mutant	0	0	0	non-codel	WT	Methylated	1.6	Astrocytoma, IDH-mutant. Grade 2.
TCGA-HT-7604	50	astrocytoma	G2	Mutant	No combined CNA	WT	Mutant	0	0	0	non-codel	WT	Methylated	2.1	Astrocytoma, IDH-mutant. Grade 2.
TCGA-HT-7605	38	oligodendroglioma	G2	Mutant	No combined CNA	Mutant	WT	0	0	0	codel	WT	Methylated	1.1	Oligodendroglioma, IDH-mutant, 1p/19q-codeleted. Grade 2.
TCGA-HT-7606	30	astrocytoma	G2	Mutant	No combined CNA	WT	WT	0	-1	-1	non-codel	WT	Unmethylated	2.1	Astrocytoma, IDH-mutant. Grade 2.
TCGA-HT-7607	61	astrocytoma	G2	Mutant	No combined CNA	Mutant	WT	0	0	0	codel	WT	Methylated	2.4	Oligodendroglioma, IDH-mutant, 1p/19q-codeleted. Grade 2.
TCGA-HT-7608	61	oligoastrocytoma	G2	Mutant	No combined CNA	Mutant	WT	0	0	0	codel	WT	Methylated	3.5	Oligodendroglioma, IDH-mutant, 1p/19q-codeleted. Grade 2.
TCGA-HT-7609	34	oligoastrocytoma	G3	Mutant	No combined CNA	WT	WT	0	0	0	non-codel	WT	Methylated	3.2	Astrocytoma, IDH-mutant. Grade 3.
TCGA-HT-7610	25	oligoastrocytoma	G2	Mutant	No combined CNA	WT	Mutant	0	0	0	non-codel	WT	Methylated	3.1	Astrocytoma, IDH-mutant. Grade 2.
TCGA-HT-7611	36	oligoastrocytoma	G2	Mutant	No combined CNA	WT	Mutant	0	0	0	non-codel	WT	Methylated	3.1	Astrocytoma, IDH-mutant. Grade 2.
TCGA-HT-7616	75	oligodendroglioma	G3	Mutant	No combined CNA	Mutant	WT	0	0	0	codel	WT	Methylated	1.2	Oligodendroglioma, IDH-mutant, 1p/19q-codeleted. Grade 3.
TCGA-HT-7620	40	oligodendroglioma	G3	Mutant	No combined CNA	Mutant	WT	0	0	0	codel	WT	Methylated	1.2	Oligodendroglioma, IDH-mutant, 1p/19q-codeleted. Grade 3.
TCGA-HT-7676	26	oligodendroglioma	G2	Mutant	No combined CNA	WT	Mutant	0	0	0	non-codel	WT	Unmethylated	1.6	Astrocytoma, IDH-mutant. Grade 2.
TCGA-HT-7677	53	oligodendroglioma	G3	Mutant	No combined CNA	Mutant	WT	0	0	0	codel	WT	Methylated	1.2	Oligodendroglioma, IDH-mutant, 1p/19q-codeleted. Grade 3.
TCGA-RR-A6KA	72	glioblastoma	G4	WT	No combined CNA	unknown	WT	1	-2	-2	non-codel	WT	Methylated	4.2	Glioblastoma, IDH-wildtype. Grade 4.
TCGA-HT-7681	29	oligoastrocytoma	G2	Mutant	No combined CNA	Mutant	WT	0	0	0	codel	WT	Methylated	3.5	Oligodendroglioma, IDH-mutant, 1p/19q-codeleted. Grade 2.
TCGA-HT-7684	58	oligoastrocytoma	G3	Mutant	No combined CNA	Mutant	WT	0	0	0	non-codel	WT	Methylated	3.2	Astrocytoma, IDH-mutant. Grade 3.
TCGA-HT-7686	29	astrocytoma	G3	Mutant	No combined CNA	WT	Mutant	0	0	0	non-codel	WT	Methylated	2.2	Astrocytoma, IDH-mutant. Grade 3.
TCGA-HT-7687	74	oligodendroglioma	G3	Mutant	No combined CNA	Mutant	WT	0	-1	-1	codel	WT	Methylated	1.2	Oligodendroglioma, IDH-mutant, 1p/19q-codeleted. Grade 3.
TCGA-HT-7688	59	oligodendroglioma	G3	Mutant	No combined CNA	WT	Mutant	1	-1	-1	non-codel	WT	Methylated	1.7	Astrocytoma, IDH-mutant. Grade 3.
TCGA-HT-7689	58	oligodendroglioma	G2	Mutant	No combined CNA	WT	Mutant	0	-1	-1	non-codel	WT	Methylated	1.6	Astrocytoma, IDH-mutant. Grade 2.
TCGA-HT-7690	29	oligoastrocytoma	G3	Mutant	No combined CNA	WT	Mutant	0	0	0	non-codel	WT	Methylated	3.2	Astrocytoma, IDH-mutant. Grade 3.
TCGA-14-3476	74	glioblastoma	G4	WT	unknown	unknown	WT	unknown	unknown	unknown	unknown	WT	Unmethylated	4.2	Glioblastoma, IDH-wildtype. Grade 4.
TCGA-HT-7692	43	oligoastrocytoma	G2	Mutant	No combined CNA	Mutant	WT	0	-1	-1	codel	WT	Methylated	3.5	Oligodendroglioma, IDH-mutant, 1p/19q-codeleted. Grade 2.
TCGA-HT-7693	51	oligodendroglioma	G2	Mutant	No combined CNA	WT	Mutant	0	0	0	non-codel	WT	Methylated	1.6	Astrocytoma, IDH-mutant. Grade 2.
TCGA-HT-7694	60	oligodendroglioma	G3	Mutant	No combined CNA	Mutant	WT	0	0	0	codel	WT	Methylated	1.2	Oligodendroglioma, IDH-mutant, 1p/19q-codeleted. Grade 3.
TCGA-HT-7695	29	oligodendroglioma	G2	Mutant	No combined CNA	Mutant	WT	0	0	0	codel	WT	Methylated	1.1	Oligodendroglioma, IDH-mutant, 1p/19q-codeleted. Grade 2.
TCGA-HT-7854	62	astrocytoma	G2	WT	No combined CNA	Mutant	WT	0	0	0	non-codel	WT	Unmethylated	2.7	Glioblastoma, IDH-wildtype. Grade 4.
TCGA-HT-7855	39	astrocytoma	G3	Mutant	No combined CNA	WT	Mutant	0	-1	-1	non-codel	WT	Methylated	2.2	Astrocytoma, IDH-mutant. Grade 3.
TCGA-HT-7856	35	oligodendroglioma	G3	Mutant	No combined CNA	Mutant	WT	0	0	0	codel	WT	Methylated	1.2	Oligodendroglioma, IDH-mutant, 1p/19q-codeleted. Grade 3.
TCGA-26-5134	74	glioblastoma	G4	WT	No combined CNA	unknown	WT	0	-2	-2	non-codel	WT	Unmethylated	4.2	Glioblastoma, IDH-wildtype. Grade 4.
TCGA-HT-7858	28	astrocytoma	G2	Mutant	No combined CNA	WT	Mutant	0	0	0	non-codel	WT	Methylated	2.1	Astrocytoma, IDH-mutant. Grade 2.
TCGA-HT-7860	60	astrocytoma	G3	WT	Gain chr 7 & loss chr 10	Mutant	WT	1	-2	-2	non-codel	WT	Methylated	2.7	Glioblastoma, IDH-wildtype. Grade 4.
TCGA-HT-7873	29	oligoastrocytoma	G2	Mutant	No combined CNA	WT	Mutant	0	0	0	non-codel	WT	Methylated	3.1	Astrocytoma, IDH-mutant. Grade 2.
TCGA-HT-7874	41	oligodendroglioma	G3	Mutant	No combined CNA	Mutant	WT	0	0	0	codel	WT	Methylated	1.2	Oligodendroglioma, IDH-mutant, 1p/19q-codeleted. Grade 3.
TCGA-HT-7875	56	oligodendroglioma	G2	Mutant	No combined CNA	Mutant	WT	0	0	0	codel	WT	Methylated	1.1	Oligodendroglioma, IDH-mutant, 1p/19q-codeleted. Grade 2.
TCGA-HT-7877	20	oligodendroglioma	G2	Mutant	No combined CNA	Mutant	WT	0	0	0	codel	WT	Methylated	1.1	Oligodendroglioma, IDH-mutant, 1p/19q-codeleted. Grade 2.
TCGA-HT-7879	31	oligoastrocytoma	G3	Mutant	No combined CNA	WT	Mutant	0	0	0	non-codel	WT	Methylated	3.2	Astrocytoma, IDH-mutant. Grade 3.
TCGA-HT-7880	30	oligoastrocytoma	G2	Mutant	No combined CNA	WT	Mutant	0	0	0	non-codel	WT	Methylated	3.1	Astrocytoma, IDH-mutant. Grade 2.
TCGA-HT-7881	38	oligodendroglioma	G2	Mutant	No combined CNA	Mutant	WT	0	0	0	codel	WT	Methylated	1.1	Oligodendroglioma, IDH-mutant, 1p/19q-codeleted. Grade 2.
TCGA-HT-7882	66	oligodendroglioma	G3	WT	No combined CNA	Mutant	WT	1	0	0	non-codel	WT	Methylated	1.10	Glioblastoma, IDH-wildtype. Grade 4.
TCGA-HT-7884	44	astrocytoma	G2	Mutant	No combined CNA	WT	Mutant	0	0	0	non-codel	WT	Methylated	2.1	Astrocytoma, IDH-mutant. Grade 2.
TCGA-HT-7902	30	oligoastrocytoma	G2	Mutant	No combined CNA	WT	Mutant	0	-1	-1	non-codel	WT	Methylated	3.1	Astrocytoma, IDH-mutant. Grade 2.
TCGA-HT-8010	64	oligodendroglioma	G2	Mutant	No combined CNA	WT	WT	0	0	0	codel	WT	Methylated	1.1	Oligodendroglioma, IDH-mutant, 1p/19q-codeleted. Grade 2.
TCGA-HT-8011	55	astrocytoma	G3	WT	Gain chr 7 & loss chr 10	Mutant	WT	1	-2	-2	non-codel	WT	Unmethylated	2.7	Glioblastoma, IDH-wildtype. Grade 4.
TCGA-HT-8012	30	oligodendroglioma	G2	Mutant	No combined CNA	Mutant	WT	0	0	0	codel	WT	Methylated	1.1	Oligodendroglioma, IDH-mutant, 1p/19q-codeleted. Grade 2.
TCGA-HT-8013	37	oligoastrocytoma	G2	Mutant	No combined CNA	WT	Mutant	1	0	0	non-codel	WT	Methylated	3.1	Astrocytoma, IDH-mutant. Grade 2.
TCGA-06-6694	76	glioblastoma	G4	WT	No combined CNA	unknown	WT	1	-2	-2	non-codel	WT	Methylated	4.2	Glioblastoma, IDH-wildtype. Grade 4.
TCGA-HT-8018	40	oligoastrocytoma	G2	Mutant	No combined CNA	WT	WT	0	0	0	non-codel	WT	Methylated	3.1	Astrocytoma, IDH-mutant. Grade 2.
TCGA-19-2625	76	glioblastoma	G4	WT	No combined CNA	unknown	WT	0	-1	-1	non-codel	WT	Unmethylated	4.2	Glioblastoma, IDH-wildtype. Grade 4.
TCGA-HT-8104	51	astrocytoma	G3	WT	Gain chr 7 & loss chr 10	Mutant	WT	2	-2	-2	non-codel	WT	Unmethylated	2.7	Glioblastoma, IDH-wildtype. Grade 4.
TCGA-HT-8105	54	oligodendroglioma	G3	Mutant	No combined CNA	Mutant	WT	0	0	0	codel	WT	Methylated	1.2	Oligodendroglioma, IDH-mutant, 1p/19q-codeleted. Grade 3.
TCGA-HT-8106	53	astrocytoma	G3	Mutant	No combined CNA	WT	WT	0	0	0	non-codel	WT	Methylated	2.2	Astrocytoma, IDH-mutant. Grade 3.
TCGA-28-1745	76	glioblastoma	G4	WT	unknown	unknown	unknown	unknown	unknown	unknown	unknown	WT	Unmethylated	4.2	Glioblastoma, IDH-wildtype. Grade 4.
TCGA-HT-8108	26	oligodendroglioma	G2	Mutant	No combined CNA	WT	Mutant	0	-1	-1	non-codel	WT	Methylated	1.6	Astrocytoma, IDH-mutant. Grade 2.
TCGA-HT-8109	64	oligodendroglioma	G3	Mutant	No combined CNA	Mutant	WT	0	0	0	codel	WT	Methylated	1.2	Oligodendroglioma, IDH-mutant, 1p/19q-codeleted. Grade 3.
TCGA-HT-8110	57	astrocytoma	G3	WT	Gain chr 7 & loss chr 10	Mutant	WT	2	-2	-2	non-codel	WT	Methylated	2.7	Glioblastoma, IDH-wildtype. Grade 4.
TCGA-HT-8111	32	oligoastrocytoma	G3	Mutant	No combined CNA	WT	WT	0	0	0	non-codel	WT	Methylated	3.2	Astrocytoma, IDH-mutant. Grade 3.
TCGA-HT-8113	49	oligodendroglioma	G2	Mutant	No combined CNA	Mutant	WT	0	0	0	non-codel	WT	Methylated	1.6	Astrocytoma, IDH-mutant. Grade 2.
TCGA-HT-8114	36	oligoastrocytoma	G3	Mutant	No combined CNA	WT	Mutant	0	0	0	non-codel	WT	Methylated	3.2	Astrocytoma, IDH-mutant. Grade 3.
TCGA-02-0047	78	glioblastoma	G4	WT	No combined CNA	unknown	WT	0	-2	-2	non-codel	WT	Unmethylated	4.2	Glioblastoma, IDH-wildtype. Grade 4.
TCGA-HT-8563	30	astrocytoma	G3	Mutant	No combined CNA	WT	Mutant	0	0	0	non-codel	WT	Unmethylated	2.2	Astrocytoma, IDH-mutant. Grade 3.
TCGA-06-5412	78	glioblastoma	G4	WT	No combined CNA	unknown	WT	1	-1	-1	non-codel	WT	Methylated	4.2	Glioblastoma, IDH-wildtype. Grade 4.
TCGA-HT-A4DS	55	astrocytoma	G3	WT	No combined CNA	Mutant	WT	1	-2	-2	non-codel	WT	Unmethylated	2.7	Glioblastoma, IDH-wildtype. Grade 4.
TCGA-HT-A4DV	51	oligodendroglioma	G3	Mutant	No combined CNA	Mutant	WT	0	0	0	codel	WT	Methylated	1.2	Oligodendroglioma, IDH-mutant, 1p/19q-codeleted. Grade 3.
TCGA-HT-A5R5	33	oligodendroglioma	G2	Mutant	No combined CNA	WT	Mutant	1	0	0	non-codel	WT	Methylated	1.6	Astrocytoma, IDH-mutant. Grade 2.
TCGA-HT-A5R7	33	astrocytoma	G3	Mutant	No combined CNA	WT	Mutant	0	0	0	non-codel	WT	Methylated	2.2	Astrocytoma, IDH-mutant. Grade 3.
TCGA-HT-A5R9	48	oligodendroglioma	G3	Mutant	No combined CNA	Mutant	WT	1	0	0	codel	WT	Methylated	1.2	Oligodendroglioma, IDH-mutant, 1p/19q-codeleted. Grade 3.
TCGA-HT-A5RA	65	astrocytoma	G3	WT	No combined CNA	Mutant	WT	2	-2	-2	non-codel	WT	Unmethylated	2.7	Glioblastoma, IDH-wildtype. Grade 4.
TCGA-HT-A5RB	24	astrocytoma	G2	Mutant	No combined CNA	WT	Mutant	0	-1	-1	non-codel	WT	Methylated	2.1	Astrocytoma, IDH-mutant. Grade 2.
TCGA-HT-A5RC	70	astrocytoma	G3	WT	Gain chr 7 & loss chr 10	WT	WT	2	-2	-2	non-codel	WT	Unmethylated	2.7	Glioblastoma, IDH-wildtype. Grade 4.
TCGA-HT-A614	47	oligoastrocytoma	G2	Mutant	No combined CNA	WT	Mutant	0	-1	-1	non-codel	WT	Methylated	3.1	Astrocytoma, IDH-mutant. Grade 2.
TCGA-HT-A615	38	oligodendroglioma	G2	Mutant	No combined CNA	Mutant	WT	0	0	0	codel	WT	Methylated	1.1	Oligodendroglioma, IDH-mutant, 1p/19q-codeleted. Grade 2.
TCGA-HT-A616	36	astrocytoma	G2	Mutant	No combined CNA	WT	Mutant	0	0	0	non-codel	WT	Methylated	2.1	Astrocytoma, IDH-mutant. Grade 2.
TCGA-HT-A617	47	oligodendroglioma	G2	WT	Gain chr 7 & loss chr 10	Mutant	WT	1	0	0	non-codel	WT	Unmethylated	1.10	Glioblastoma, IDH-wildtype. Grade 4.
TCGA-HT-A618	37	astrocytoma	G3	Mutant	No combined CNA	WT	Mutant	0	0	0	non-codel	WT	Methylated	2.2	Astrocytoma, IDH-mutant. Grade 3.
TCGA-HT-A619	51	oligodendroglioma	G3	Mutant	No combined CNA	Mutant	WT	1	0	0	codel	WT	Methylated	1.2	Oligodendroglioma, IDH-mutant, 1p/19q-codeleted. Grade 3.
TCGA-HT-A61A	20	oligodendroglioma	G2	Mutant	unknown	Mutant	WT	unknown	unknown	unknown	non-codel	WT	Methylated	1.9	Astrocytoma, IDH-mutant. Grade NA.
TCGA-HT-A61B		unknown	unknown	Mutant	No combined CNA	WT	WT	0	0	0	non-codel	WT	Methylated	5.1	NA. Grade NA.
TCGA-HT-A61C	66	oligodendroglioma	G3	WT	Gain chr 7 & loss chr 10	Mutant	WT	1	-2	-2	non-codel	WT	Unmethylated	1.10	Glioblastoma, IDH-wildtype. Grade 4.
TCGA-HT-A74H	62	astrocytoma	G3	WT	Gain chr 7 & loss chr 10	unknown	WT	1	0	0	non-codel	WT	Unmethylated	2.7	Glioblastoma, IDH-wildtype. Grade 4.
TCGA-HT-A74J	33	oligoastrocytoma	G2	Mutant	No combined CNA	unknown	Mutant	1	-1	-1	non-codel	WT	Unmethylated	3.1	Astrocytoma, IDH-mutant. Grade 2.
TCGA-HT-A74K		unknown	unknown	Mutant	No combined CNA	unknown	WT	1	0	0	codel	WT	Methylated	5.1	NA. Grade NA.
TCGA-HT-A74L		unknown	unknown	Mutant	No combined CNA	unknown	WT	0	0	0	codel	WT	Methylated	5.1	NA. Grade NA.
TCGA-HT-A74O	34	astrocytoma	G3	Mutant	No combined CNA	unknown	Mutant	0	0	0	non-codel	WT	Methylated	2.2	Astrocytoma, IDH-mutant. Grade 3.
TCGA-HW-7486	37	oligodendroglioma	G2	Mutant	No combined CNA	Mutant	WT	0	0	0	codel	WT	Methylated	1.1	Oligodendroglioma, IDH-mutant, 1p/19q-codeleted. Grade 2.
TCGA-HW-7487	39	oligodendroglioma	G2	Mutant	No combined CNA	Mutant	WT	0	0	0	codel	WT	Methylated	1.1	Oligodendroglioma, IDH-mutant, 1p/19q-codeleted. Grade 2.
TCGA-HW-7489	38	oligoastrocytoma	G2	Mutant	No combined CNA	WT	Mutant	0	0	0	non-codel	WT	Methylated	3.1	Astrocytoma, IDH-mutant. Grade 2.
TCGA-HW-7490	41	astrocytoma	G2	Mutant	No combined CNA	WT	Mutant	0	-1	-1	non-codel	WT	Methylated	2.1	Astrocytoma, IDH-mutant. Grade 2.
TCGA-HW-7491	35	oligodendroglioma	G2	Mutant	No combined CNA	Mutant	WT	0	0	0	codel	WT	Unmethylated	1.1	Oligodendroglioma, IDH-mutant, 1p/19q-codeleted. Grade 2.
TCGA-HW-7493	40	astrocytoma	G2	mutant (maf)	No combined CNA	unknown	unknown	0	0	0	non-codel	WT	Methylated	2.1	Astrocytoma, IDH-mutant. Grade 2.
TCGA-HW-7495	45	oligodendroglioma	G2	Mutant	No combined CNA	Mutant	WT	0	0	0	codel	WT	Methylated	1.1	Oligodendroglioma, IDH-mutant, 1p/19q-codeleted. Grade 2.
TCGA-HW-8319	34	astrocytoma	G3	Mutant	No combined CNA	WT	Mutant	0	-1	-1	non-codel	WT	Unmethylated	2.2	Astrocytoma, IDH-mutant. Grade 3.
TCGA-HW-8320	36	astrocytoma	G3	Mutant	No combined CNA	WT	WT	0	-1	-1	non-codel	WT	Methylated	2.2	Astrocytoma, IDH-mutant. Grade 3.
TCGA-HW-8321	31	astrocytoma	G3	Mutant	No combined CNA	WT	WT	0	0	0	non-codel	WT	Methylated	2.2	Astrocytoma, IDH-mutant. Grade 3.
TCGA-HW-8322	39	oligodendroglioma	G2	Mutant	No combined CNA	Mutant	WT	0	-1	-1	codel	WT	Methylated	1.1	Oligodendroglioma, IDH-mutant, 1p/19q-codeleted. Grade 2.
TCGA-HW-A5KJ	68	oligodendroglioma	G3	Mutant	No combined CNA	Mutant	WT	0	0	0	codel	WT	Methylated	1.2	Oligodendroglioma, IDH-mutant, 1p/19q-codeleted. Grade 3.
TCGA-HW-A5KK	64	astrocytoma	G3	WT	No combined CNA	Mutant	WT	2	-2	-2	non-codel	WT	Methylated	2.7	Glioblastoma, IDH-wildtype. Grade 4.
TCGA-HW-A5KL	42	astrocytoma	G2	Mutant	No combined CNA	WT	Mutant	-1	0	0	non-codel	WT	Methylated	2.1	Astrocytoma, IDH-mutant. Grade 2.
TCGA-HW-A5KM	35	astrocytoma	G2	Mutant	No combined CNA	WT	WT	0	-1	-1	non-codel	WT	Methylated	2.1	Astrocytoma, IDH-mutant. Grade 2.
TCGA-IK-7675	43	oligodendroglioma	G2	Mutant	No combined CNA	WT	Mutant	0	-1	-1	non-codel	WT	Methylated	1.6	Astrocytoma, IDH-mutant. Grade 2.
TCGA-IK-8125	62	oligoastrocytoma	G3	Mutant	No combined CNA	Mutant	WT	0	0	0	codel	WT	Methylated	3.6	Oligodendroglioma, IDH-mutant, 1p/19q-codeleted. Grade 3.
TCGA-KT-A74X	26	oligoastrocytoma	G3	Mutant	No combined CNA	unknown	WT	0	0	0	codel	WT	Methylated	3.6	Oligodendroglioma, IDH-mutant, 1p/19q-codeleted. Grade 3.
TCGA-KT-A7W1	45	astrocytoma	G3	WT	Gain chr 7 & loss chr 10	unknown	WT	2	-2	-2	non-codel	WT	Methylated	2.7	Glioblastoma, IDH-wildtype. Grade 4.
TCGA-OX-A56R	68	glioblastoma	G4	WT	Gain chr 7 & loss chr 10	unknown	WT	2	-2	-2	non-codel	WT	Methylated	4.1	Glioblastoma, IDH-wildtype. Grade 4.
TCGA-P5-A5ET	27	oligodendroglioma	G2	Mutant	No combined CNA	Mutant	WT	0	0	0	codel	WT	Methylated	1.1	Oligodendroglioma, IDH-mutant, 1p/19q-codeleted. Grade 2.
TCGA-P5-A5EU	35	astrocytoma	G3	Mutant	No combined CNA	WT	Mutant	0	-2	-2	non-codel	WT	Unmethylated	2.3	Astrocytoma, IDH-mutant. Grade 4.
TCGA-P5-A5EV	39	astrocytoma	G2	Mutant	No combined CNA	WT	Mutant	0	-1	-1	non-codel	WT	Methylated	2.1	Astrocytoma, IDH-mutant. Grade 2.
TCGA-P5-A5EW	20	astrocytoma	G2	Mutant	No combined CNA	WT	Mutant	0	0	0	non-codel	WT	Methylated	2.1	Astrocytoma, IDH-mutant. Grade 2.
TCGA-P5-A5EX	41	oligodendroglioma	G3	Mutant	No combined CNA	Mutant	WT	0	0	0	codel	WT	Methylated	1.2	Oligodendroglioma, IDH-mutant, 1p/19q-codeleted. Grade 3.
TCGA-14-1396	78	glioblastoma	G4	WT	No combined CNA	unknown	unknown	1	-2	-2	non-codel	WT	Methylated	4.2	Glioblastoma, IDH-wildtype. Grade 4.
TCGA-P5-A5EZ	39	astrocytoma	G3	Mutant	No combined CNA	WT	WT	1	-1	-1	non-codel	WT	Methylated	2.2	Astrocytoma, IDH-mutant. Grade 3.
TCGA-P5-A5F0	33	oligodendroglioma	G2	Mutant	No combined CNA	Mutant	WT	1	0	0	codel	WT	Methylated	1.1	Oligodendroglioma, IDH-mutant, 1p/19q-codeleted. Grade 2.
TCGA-P5-A5F1	30	astrocytoma	G2	Mutant	No combined CNA	WT	Mutant	0	0	0	non-codel	WT	Unmethylated	2.1	Astrocytoma, IDH-mutant. Grade 2.
TCGA-P5-A5F2	36	astrocytoma	G2	Mutant	No combined CNA	WT	Mutant	0	-1	-1	non-codel	WT	Methylated	2.1	Astrocytoma, IDH-mutant. Grade 2.
TCGA-P5-A5F4	35	oligodendroglioma	G3	Mutant	No combined CNA	WT	WT	0	-1	-1	non-codel	WT	Methylated	1.7	Astrocytoma, IDH-mutant. Grade 3.
TCGA-76-6193	78	glioblastoma	G4	WT	No combined CNA	unknown	WT	0	0	0	non-codel	WT	Unmethylated	4.2	Glioblastoma, IDH-wildtype. Grade 4.
TCGA-P5-A72U	71	oligodendroglioma	G3	WT	Gain chr 7 & loss chr 10	unknown	WT	1	-1	-1	non-codel	WT	Methylated	1.10	Glioblastoma, IDH-wildtype. Grade 4.
TCGA-P5-A72W	35	astrocytoma	G3	Mutant	No combined CNA	unknown	Mutant	0	0	0	non-codel	WT	Unmethylated	2.2	Astrocytoma, IDH-mutant. Grade 3.
TCGA-P5-A72X	21	astrocytoma	G3	Mutant	No combined CNA	unknown	WT	0	0	0	non-codel	WT	Methylated	2.2	Astrocytoma, IDH-mutant. Grade 3.
TCGA-P5-A72Z	64	oligodendroglioma	G3	Mutant	No combined CNA	unknown	WT	0	-1	-1	codel	WT	Methylated	1.2	Oligodendroglioma, IDH-mutant, 1p/19q-codeleted. Grade 3.
TCGA-P5-A730	22	oligoastrocytoma	G3	Mutant	No combined CNA	unknown	WT	0	0	0	codel	WT	Methylated	3.6	Oligodendroglioma, IDH-mutant, 1p/19q-codeleted. Grade 3.
TCGA-P5-A731	59	oligoastrocytoma	G2	Mutant	No combined CNA	unknown	WT	0	0	0	non-codel	WT	Methylated	3.1	Astrocytoma, IDH-mutant. Grade 2.
TCGA-P5-A733	52	astrocytoma	G2	Mutant	No combined CNA	unknown	Mutant	0	0	0	non-codel	WT	Methylated	2.1	Astrocytoma, IDH-mutant. Grade 2.
TCGA-P5-A735		unknown	unknown	Mutant	No combined CNA	unknown	Mutant	0	0	0	non-codel	WT	Methylated	5.1	NA. Grade NA.
TCGA-P5-A736		unknown	unknown	Mutant	No combined CNA	unknown	Mutant	1	0	0	non-codel	WT	Methylated	5.1	NA. Grade NA.
TCGA-P5-A737		unknown	unknown	Mutant	No combined CNA	unknown	WT	0	0	0	codel	WT	Methylated	5.1	NA. Grade NA.
TCGA-P5-A77W		unknown	unknown	Mutant	No combined CNA	unknown	WT	0	0	0	codel	WT	Methylated	5.1	NA. Grade NA.
TCGA-P5-A77X		unknown	unknown	Mutant	No combined CNA	unknown	WT	0	0	0	codel	WT	Methylated	5.1	NA. Grade NA.
TCGA-P5-A780		unknown	unknown	Mutant	No combined CNA	unknown	WT	0	-2	-2	non-codel	WT	Methylated	5.1	NA. Grade NA.
TCGA-P5-A781		unknown	unknown	Mutant	No combined CNA	unknown	WT	0	0	0	codel	WT	Methylated	5.1	NA. Grade NA.
TCGA-QH-A65R	38	oligodendroglioma	G3	Mutant	No combined CNA	unknown	WT	0	0	0	codel	WT	Methylated	1.2	Oligodendroglioma, IDH-mutant, 1p/19q-codeleted. Grade 3.
TCGA-QH-A65S	32	oligoastrocytoma	G2	Mutant	No combined CNA	WT	Mutant	0	0	0	non-codel	WT	Methylated	3.1	Astrocytoma, IDH-mutant. Grade 2.
TCGA-QH-A65V	43	oligodendroglioma	G2	Mutant	No combined CNA	Mutant	WT	0	0	0	codel	WT	Methylated	1.1	Oligodendroglioma, IDH-mutant, 1p/19q-codeleted. Grade 2.
TCGA-QH-A65X	28	oligoastrocytoma	G3	Mutant	No combined CNA	unknown	WT	0	0	0	codel	WT	Methylated	3.6	Oligodendroglioma, IDH-mutant, 1p/19q-codeleted. Grade 3.
TCGA-QH-A65Z	54	oligodendroglioma	G2	Mutant	No combined CNA	Mutant	WT	0	0	0	codel	WT	Methylated	1.1	Oligodendroglioma, IDH-mutant, 1p/19q-codeleted. Grade 2.
TCGA-QH-A6CS	41	astrocytoma	G3	WT	Gain chr 7 & loss chr 10	unknown	WT	1	0	0	non-codel	WT	Unmethylated	2.7	Glioblastoma, IDH-wildtype. Grade 4.
TCGA-QH-A6CU	52	oligodendroglioma	G3	Mutant	No combined CNA	unknown	WT	0	0	0	codel	WT	Methylated	1.2	Oligodendroglioma, IDH-mutant, 1p/19q-codeleted. Grade 3.
TCGA-QH-A6CV	51	oligoastrocytoma	G3	WT	Gain chr 7 & loss chr 10	unknown	WT	2	-1	-1	non-codel	WT	Unmethylated	3.12	Glioblastoma, IDH-wildtype. Grade 4.
TCGA-QH-A6CW	43	oligoastrocytoma	G3	Mutant	No combined CNA	unknown	Mutant	0	0	0	non-codel	WT	Methylated	3.2	Astrocytoma, IDH-mutant. Grade 3.
TCGA-QH-A6CX	66	astrocytoma	G2	WT	No combined CNA	unknown	WT	2	-2	-2	non-codel	WT	Unmethylated	2.7	Glioblastoma, IDH-wildtype. Grade 4.
TCGA-QH-A6CY	38	oligoastrocytoma	G3	Mutant	No combined CNA	unknown	WT	0	0	0	codel	WT	Methylated	3.6	Oligodendroglioma, IDH-mutant, 1p/19q-codeleted. Grade 3.
TCGA-QH-A6CZ	38	oligoastrocytoma	G2	Mutant	No combined CNA	unknown	WT	0	-1	-1	codel	WT	Methylated	3.5	Oligodendroglioma, IDH-mutant, 1p/19q-codeleted. Grade 2.
TCGA-QH-A6X3	27	oligoastrocytoma	G2	Mutant	No combined CNA	unknown	Mutant	0	0	0	non-codel	WT	Methylated	3.1	Astrocytoma, IDH-mutant. Grade 2.
TCGA-QH-A6X4	47	oligoastrocytoma	G3	Mutant	No combined CNA	unknown	WT	0	0	0	codel	WT	Methylated	3.6	Oligodendroglioma, IDH-mutant, 1p/19q-codeleted. Grade 3.
TCGA-QH-A6X5	58	oligoastrocytoma	G2	Mutant	No combined CNA	unknown	WT	0	0	0	codel	WT	Methylated	3.5	Oligodendroglioma, IDH-mutant, 1p/19q-codeleted. Grade 2.
TCGA-QH-A6X8	56	oligodendroglioma	G3	Mutant	No combined CNA	unknown	WT	0	0	0	codel	WT	Methylated	1.2	Oligodendroglioma, IDH-mutant, 1p/19q-codeleted. Grade 3.
TCGA-QH-A6X9	73	oligodendroglioma	G2	Mutant	No combined CNA	unknown	Mutant	1	-1	-1	non-codel	WT	Methylated	1.6	Astrocytoma, IDH-mutant. Grade 2.
TCGA-QH-A6XA	23	oligoastrocytoma	G2	Mutant	No combined CNA	unknown	Mutant	1	0	0	non-codel	WT	Methylated	3.1	Astrocytoma, IDH-mutant. Grade 2.
TCGA-QH-A6XC	48	astrocytoma	G3	WT	Gain chr 7 & loss chr 10	unknown	WT	2	-2	-2	non-codel	WT	Methylated	2.7	Glioblastoma, IDH-wildtype. Grade 4.
TCGA-QH-A86X	33	oligodendroglioma	G2	Mutant	No combined CNA	unknown	WT	0	0	0	codel	WT	Methylated	1.1	Oligodendroglioma, IDH-mutant, 1p/19q-codeleted. Grade 2.
TCGA-QH-A870	38	oligoastrocytoma	G3	Mutant	No combined CNA	unknown	Mutant	0	0	0	non-codel	WT	Methylated	3.2	Astrocytoma, IDH-mutant. Grade 3.
TCGA-R8-A6MK	40	oligodendroglioma	G2	Mutant	No combined CNA	unknown	WT	0	0	0	codel	WT	Methylated	1.1	Oligodendroglioma, IDH-mutant, 1p/19q-codeleted. Grade 2.
TCGA-R8-A6ML	52	oligodendroglioma	G3	Mutant	No combined CNA	unknown	WT	0	0	0	codel	WT	Methylated	1.2	Oligodendroglioma, IDH-mutant, 1p/19q-codeleted. Grade 3.
TCGA-R8-A6MO	53	oligodendroglioma	G2	Mutant	No combined CNA	unknown	WT	0	0	0	codel	WT	Methylated	1.1	Oligodendroglioma, IDH-mutant, 1p/19q-codeleted. Grade 2.
TCGA-R8-A6YH		unknown	unknown	Mutant	No combined CNA	unknown	Mutant	0	-1	-1	non-codel	WT	Unmethylated	5.1	NA. Grade NA.
TCGA-R8-A73M	48	oligodendroglioma	G2	Mutant	No combined CNA	unknown	WT	0	0	0	codel	WT	Methylated	1.1	Oligodendroglioma, IDH-mutant, 1p/19q-codeleted. Grade 2.
TCGA-06-0119	81	glioblastoma	G4	WT	No combined CNA	unknown	WT	1	-1	-1	non-codel	WT	Methylated	4.2	Glioblastoma, IDH-wildtype. Grade 4.
TCGA-RR-A6KB		unknown	unknown	WT	Gain chr 7 & loss chr 10	unknown	WT	1	-2	-2	non-codel	WT	Unmethylated	5.1	NA. Grade NA.
TCGA-RR-A6KC	55	glioblastoma	G4	WT	Gain chr 7 & loss chr 10	unknown	WT	2	-2	-2	non-codel	WT	Unmethylated	4.1	Glioblastoma, IDH-wildtype. Grade 4.
TCGA-RY-A83X		unknown	unknown	Mutant	No combined CNA	unknown	WT	0	0	0	codel	WT	Methylated	5.1	NA. Grade NA.
TCGA-RY-A83Y		unknown	unknown	Mutant	No combined CNA	unknown	WT	0	0	0	codel	WT	Methylated	5.1	NA. Grade NA.
TCGA-RY-A83Z		unknown	unknown	Mutant	No combined CNA	unknown	Mutant	0	-2	-2	non-codel	WT	Methylated	5.1	NA. Grade NA.
TCGA-RY-A840		unknown	unknown	Mutant	No combined CNA	unknown	WT	0	0	0	codel	WT	Methylated	5.1	NA. Grade NA.
TCGA-RY-A843		unknown	unknown	Mutant	No combined CNA	unknown	WT	0	0	0	non-codel	WT	Methylated	5.1	NA. Grade NA.
TCGA-RY-A845		unknown	unknown	Mutant	No combined CNA	unknown	WT	1	0	0	non-codel	WT	Methylated	5.1	NA. Grade NA.
TCGA-RY-A847		unknown	unknown	Mutant	No combined CNA	unknown	WT	0	0	0	codel	WT	Methylated	5.1	NA. Grade NA.
TCGA-S9-A6TS	48	astrocytoma	G3	Mutant	No combined CNA	unknown	Mutant	-1	-1	-1	non-codel	WT	Methylated	2.2	Astrocytoma, IDH-mutant. Grade 3.
TCGA-S9-A6TU	38	astrocytoma	G2	Mutant	No combined CNA	unknown	WT	0	0	0	non-codel	WT	Methylated	2.1	Astrocytoma, IDH-mutant. Grade 2.
TCGA-S9-A6TV	50	oligoastrocytoma	G3	Mutant	No combined CNA	unknown	Mutant	0	0	0	non-codel	WT	Methylated	3.2	Astrocytoma, IDH-mutant. Grade 3.
TCGA-S9-A6TW	40	oligodendroglioma	G3	Mutant	No combined CNA	unknown	WT	0	-1	-1	codel	WT	Methylated	1.2	Oligodendroglioma, IDH-mutant, 1p/19q-codeleted. Grade 3.
TCGA-S9-A6TX	46	oligodendroglioma	G3	Mutant	No combined CNA	unknown	WT	0	0	0	codel	WT	Methylated	1.2	Oligodendroglioma, IDH-mutant, 1p/19q-codeleted. Grade 3.
TCGA-S9-A6TY	50	oligodendroglioma	G2	Mutant	No combined CNA	unknown	WT	1	0	0	codel	WT	Methylated	1.1	Oligodendroglioma, IDH-mutant, 1p/19q-codeleted. Grade 2.
TCGA-S9-A6TZ	39	astrocytoma	G2	Mutant	No combined CNA	unknown	WT	0	0	0	non-codel	WT	Methylated	2.1	Astrocytoma, IDH-mutant. Grade 2.
TCGA-S9-A6U0	46	astrocytoma	G3	WT	Gain chr 7 & loss chr 10	unknown	WT	2	-2	-2	non-codel	WT	Methylated	2.7	Glioblastoma, IDH-wildtype. Grade 4.
TCGA-S9-A6U1	22	astrocytoma	G3	Mutant	No combined CNA	unknown	Mutant	0	0	0	non-codel	WT	Methylated	2.2	Astrocytoma, IDH-mutant. Grade 3.
TCGA-S9-A6U2	48	oligodendroglioma	G2	Mutant	No combined CNA	unknown	WT	0	0	0	codel	WT	Methylated	1.1	Oligodendroglioma, IDH-mutant, 1p/19q-codeleted. Grade 2.
TCGA-S9-A6U5	33	astrocytoma	G2	Mutant	No combined CNA	unknown	WT	0	0	0	codel	WT	Methylated	2.4	Oligodendroglioma, IDH-mutant, 1p/19q-codeleted. Grade 2.
TCGA-S9-A6U6	28	astrocytoma	G3	Mutant	No combined CNA	unknown	Mutant	0	0	0	non-codel	WT	Methylated	2.2	Astrocytoma, IDH-mutant. Grade 3.
TCGA-S9-A6U8	24	astrocytoma	G2	Mutant	No combined CNA	unknown	Mutant	0	0	0	non-codel	WT	Methylated	2.1	Astrocytoma, IDH-mutant. Grade 2.
TCGA-S9-A6U9	36	astrocytoma	G3	Mutant	No combined CNA	unknown	Mutant	0	0	0	non-codel	WT	Methylated	2.2	Astrocytoma, IDH-mutant. Grade 3.
TCGA-27-2527	81	glioblastoma	G4	WT	No combined CNA	unknown	WT	1	-2	-2	non-codel	WT	Methylated	4.2	Glioblastoma, IDH-wildtype. Grade 4.
TCGA-S9-A6UB	52	oligodendroglioma	G2	Mutant	No combined CNA	unknown	WT	0	0	0	codel	WT	Methylated	1.1	Oligodendroglioma, IDH-mutant, 1p/19q-codeleted. Grade 2.
TCGA-S9-A6WD	58	oligodendroglioma	G3	Mutant	No combined CNA	unknown	WT	0	0	0	codel	WT	Methylated	1.2	Oligodendroglioma, IDH-mutant, 1p/19q-codeleted. Grade 3.
TCGA-S9-A6WE	34	oligodendroglioma	G2	Mutant	No combined CNA	unknown	WT	0	0	0	codel	WT	Methylated	1.1	Oligodendroglioma, IDH-mutant, 1p/19q-codeleted. Grade 2.
TCGA-S9-A6WG	31	astrocytoma	G3	Mutant	No combined CNA	unknown	Mutant	0	0	0	non-codel	WT	Methylated	2.2	Astrocytoma, IDH-mutant. Grade 3.
TCGA-S9-A6WH	73	oligoastrocytoma	G2	Mutant	No combined CNA	unknown	WT	0	-1	-1	codel	WT	Methylated	3.5	Oligodendroglioma, IDH-mutant, 1p/19q-codeleted. Grade 2.
TCGA-S9-A6WI	56	oligoastrocytoma	G2	Mutant	No combined CNA	unknown	WT	0	0	0	non-codel	WT	Methylated	3.1	Astrocytoma, IDH-mutant. Grade 2.
TCGA-S9-A6WL	52	astrocytoma	G3	Mutant	No combined CNA	unknown	WT	0	0	0	codel	WT	Methylated	2.5	Oligodendroglioma, IDH-mutant, 1p/19q-codeleted. Grade 3.
TCGA-S9-A6WM	59	astrocytoma	G3	WT	Gain chr 7 & loss chr 10	unknown	WT	2	-2	-2	non-codel	WT	Unmethylated	2.7	Glioblastoma, IDH-wildtype. Grade 4.
TCGA-S9-A6WN	38	astrocytoma	G3	Mutant	No combined CNA	unknown	WT	0	0	0	codel	WT	Methylated	2.5	Oligodendroglioma, IDH-mutant, 1p/19q-codeleted. Grade 3.
TCGA-S9-A6WO	29	astrocytoma	G2	Mutant	No combined CNA	unknown	Mutant	0	0	0	non-codel	WT	Methylated	2.1	Astrocytoma, IDH-mutant. Grade 2.
TCGA-S9-A6WP	42	oligoastrocytoma	G3	Mutant	No combined CNA	unknown	WT	0	0	0	codel	WT	Methylated	3.6	Oligodendroglioma, IDH-mutant, 1p/19q-codeleted. Grade 3.
TCGA-S9-A6WQ	57	oligoastrocytoma	G2	Mutant	No combined CNA	unknown	Mutant	0	0	0	non-codel	WT	Methylated	3.1	Astrocytoma, IDH-mutant. Grade 2.
TCGA-S9-A7IQ	45	oligoastrocytoma	G2	Mutant	No combined CNA	unknown	WT	1	0	0	codel	WT	Methylated	3.5	Oligodendroglioma, IDH-mutant, 1p/19q-codeleted. Grade 2.
TCGA-S9-A7IS	33	astrocytoma	G3	Mutant	No combined CNA	unknown	Mutant	0	-2	-2	non-codel	WT	Methylated	2.3	Astrocytoma, IDH-mutant. Grade 4.
TCGA-S9-A7IX	57	astrocytoma	G3	WT	Gain chr 7 & loss chr 10	unknown	WT	2	-2	-2	non-codel	WT	Unmethylated	2.7	Glioblastoma, IDH-wildtype. Grade 4.
TCGA-S9-A7IY	39	oligoastrocytoma	G3	Mutant	No combined CNA	unknown	WT	0	0	0	codel	WT	Methylated	3.6	Oligodendroglioma, IDH-mutant, 1p/19q-codeleted. Grade 3.
TCGA-S9-A7IZ	48	astrocytoma	G3	Mutant	No combined CNA	unknown	Mutant	1	-1	-1	non-codel	WT	Methylated	2.2	Astrocytoma, IDH-mutant. Grade 3.
TCGA-S9-A7J0	30	oligodendroglioma	G3	Mutant	No combined CNA	unknown	WT	1	-2	-2	non-codel	WT	Methylated	1.8	Astrocytoma, IDH-mutant. Grade 4.
TCGA-S9-A7J1	43	oligodendroglioma	G2	Mutant	No combined CNA	unknown	WT	0	0	0	codel	WT	Methylated	1.1	Oligodendroglioma, IDH-mutant, 1p/19q-codeleted. Grade 2.
TCGA-S9-A7J2	25	oligodendroglioma	G3	Mutant	No combined CNA	unknown	WT	0	0	0	codel	WT	Methylated	1.2	Oligodendroglioma, IDH-mutant, 1p/19q-codeleted. Grade 3.
TCGA-S9-A7J3	52	oligodendroglioma	G3	Mutant	No combined CNA	unknown	WT	0	0	0	codel	WT	Methylated	1.2	Oligodendroglioma, IDH-mutant, 1p/19q-codeleted. Grade 3.
TCGA-S9-A7QW	54	astrocytoma	G3	Mutant	No combined CNA	unknown	Mutant	0	0	0	non-codel	WT	Methylated	2.2	Astrocytoma, IDH-mutant. Grade 3.
TCGA-S9-A7QX	36	astrocytoma	G3	Mutant	No combined CNA	unknown	Mutant	0	0	0	non-codel	WT	Methylated	2.2	Astrocytoma, IDH-mutant. Grade 3.
TCGA-S9-A7QY	35	oligoastrocytoma	G2	Mutant	No combined CNA	unknown	WT	0	0	0	codel	WT	Methylated	3.5	Oligodendroglioma, IDH-mutant, 1p/19q-codeleted. Grade 2.
TCGA-S9-A7QZ	41	oligodendroglioma	G2	Mutant	No combined CNA	unknown	WT	0	0	0	codel	WT	Methylated	1.1	Oligodendroglioma, IDH-mutant, 1p/19q-codeleted. Grade 2.
TCGA-S9-A7R1	35	oligodendroglioma	G2	Mutant	No combined CNA	unknown	WT	0	-1	-1	codel	WT	Methylated	1.1	Oligodendroglioma, IDH-mutant, 1p/19q-codeleted. Grade 2.
TCGA-S9-A7R2	69	astrocytoma	G3	WT	Gain chr 7 & loss chr 10	unknown	WT	1	0	0	non-codel	WT	Unmethylated	2.7	Glioblastoma, IDH-wildtype. Grade 4.
TCGA-S9-A7R3	28	astrocytoma	G2	Mutant	No combined CNA	unknown	WT	0	-1	-1	non-codel	WT	Methylated	2.1	Astrocytoma, IDH-mutant. Grade 2.
TCGA-S9-A7R4	46	astrocytoma	G3	Mutant	No combined CNA	unknown	WT	0	0	0	non-codel	WT	Methylated	2.2	Astrocytoma, IDH-mutant. Grade 3.
TCGA-S9-A7R7	27	astrocytoma	G2	Mutant	No combined CNA	unknown	Mutant	0	0	0	non-codel	WT	Methylated	2.1	Astrocytoma, IDH-mutant. Grade 2.
TCGA-S9-A7R8	44	astrocytoma	G3	Mutant	No combined CNA	unknown	Mutant	0	-1	-1	non-codel	WT	Methylated	2.2	Astrocytoma, IDH-mutant. Grade 3.
TCGA-32-2634	82	glioblastoma	G4	WT	No combined CNA	unknown	WT	0	0	0	non-codel	WT	Methylated	4.2	Glioblastoma, IDH-wildtype. Grade 4.
TCGA-S9-A89Z	40	astrocytoma	G3	Mutant	No combined CNA	unknown	WT	0	-2	-2	non-codel	WT	Methylated	2.3	Astrocytoma, IDH-mutant. Grade 4.
TCGA-TM-A7C3	43	astrocytoma	G3	WT	Gain chr 7 & loss chr 10	unknown	WT	2	0	0	non-codel	WT	Methylated	2.7	Glioblastoma, IDH-wildtype. Grade 4.
TCGA-TM-A7C4	39	astrocytoma	G2	Mutant	No combined CNA	unknown	Mutant	0	1	1	non-codel	WT	Methylated	2.1	Astrocytoma, IDH-mutant. Grade 2.
TCGA-TM-A7C5	30	oligoastrocytoma	G2	Mutant	No combined CNA	unknown	WT	0	0	0	codel	WT	Methylated	3.5	Oligodendroglioma, IDH-mutant, 1p/19q-codeleted. Grade 2.
TCGA-TM-A7CA	44	astrocytoma	G2	Mutant	No combined CNA	unknown	Mutant	1	0	0	non-codel	WT	Methylated	2.1	Astrocytoma, IDH-mutant. Grade 2.
TCGA-TM-A7CF	41	astrocytoma	G2	Mutant	No combined CNA	WT	WT	0	-1	-1	non-codel	WT	Methylated	2.1	Astrocytoma, IDH-mutant. Grade 2.
TCGA-TM-A84B	40	astrocytoma	G3	WT	Gain chr 7 & loss chr 10	unknown	WT	1	0	0	non-codel	WT	Unmethylated	2.7	Glioblastoma, IDH-wildtype. Grade 4.
TCGA-06-2559	83	glioblastoma	G4	WT	No combined CNA	unknown	WT	1	0	0	non-codel	WT	Methylated	4.2	Glioblastoma, IDH-wildtype. Grade 4.
TCGA-TM-A84F	48	astrocytoma	G3	Mutant	No combined CNA	unknown	WT	0	0	0	non-codel	WT	Methylated	2.2	Astrocytoma, IDH-mutant. Grade 3.
TCGA-TM-A84G	54	oligodendroglioma	G3	Mutant	No combined CNA	unknown	WT	0	0	0	codel	WT	Methylated	1.2	Oligodendroglioma, IDH-mutant, 1p/19q-codeleted. Grade 3.
TCGA-TM-A84H	44	oligoastrocytoma	G3	Mutant	No combined CNA	unknown	Mutant	1	-1	-1	non-codel	WT	Methylated	3.2	Astrocytoma, IDH-mutant. Grade 3.
TCGA-TM-A84I	30	astrocytoma	G3	Mutant	No combined CNA	unknown	Mutant	0	0	0	non-codel	WT	Methylated	2.2	Astrocytoma, IDH-mutant. Grade 3.
TCGA-19-5955	83	glioblastoma	G4	WT	No combined CNA	unknown	WT	1	-2	-2	non-codel	WT	Methylated	4.2	Glioblastoma, IDH-wildtype. Grade 4.
TCGA-TM-A84L	31	oligoastrocytoma	G2	Mutant	No combined CNA	unknown	Mutant	0	0	0	non-codel	WT	Methylated	3.1	Astrocytoma, IDH-mutant. Grade 2.
TCGA-TM-A84M	40	oligodendroglioma	G3	Mutant	No combined CNA	unknown	WT	1	0	0	codel	WT	Methylated	1.2	Oligodendroglioma, IDH-mutant, 1p/19q-codeleted. Grade 3.
TCGA-TM-A84O	61	oligodendroglioma	G3	Mutant	No combined CNA	unknown	WT	0	0	0	codel	WT	Methylated	1.2	Oligodendroglioma, IDH-mutant, 1p/19q-codeleted. Grade 3.
TCGA-TM-A84Q	31	astrocytoma	G2	Mutant	No combined CNA	unknown	Mutant	0	0	0	non-codel	WT	Methylated	2.1	Astrocytoma, IDH-mutant. Grade 2.
TCGA-TM-A84R	46	oligodendroglioma	G2	Mutant	No combined CNA	unknown	WT	0	0	0	codel	WT	Methylated	1.1	Oligodendroglioma, IDH-mutant, 1p/19q-codeleted. Grade 2.
TCGA-TM-A84S	36	oligodendroglioma	G3	Mutant	No combined CNA	unknown	WT	0	0	0	codel	WT	Methylated	1.2	Oligodendroglioma, IDH-mutant, 1p/19q-codeleted. Grade 3.
TCGA-TM-A84T	19	oligoastrocytoma	G2	Mutant	No combined CNA	unknown	Mutant	0	0	0	non-codel	WT	Methylated	3.1	Astrocytoma, IDH-mutant. Grade 2.
TCGA-TQ-A7RF		unknown	unknown	Mutant	No combined CNA	unknown	WT	0	0	0	non-codel	WT	Unmethylated	5.1	NA. Grade NA.
TCGA-TQ-A7RG		unknown	unknown	Mutant	No combined CNA	unknown	WT	0	0	0	codel	WT	Methylated	5.1	NA. Grade NA.
TCGA-TQ-A7RH		unknown	unknown	Mutant	No combined CNA	unknown	Mutant	1	-1	-1	non-codel	WT	Methylated	5.1	NA. Grade NA.
TCGA-TQ-A7RI		unknown	unknown	Mutant	No combined CNA	unknown	WT	1	0	0	codel	WT	Methylated	5.1	NA. Grade NA.
TCGA-TQ-A7RJ		unknown	unknown	Mutant	No combined CNA	unknown	Mutant	0	0	0	non-codel	WT	Methylated	5.1	NA. Grade NA.
TCGA-TQ-A7RK		unknown	unknown	Mutant	No combined CNA	WT	Mutant	0	0	0	non-codel	WT	Methylated	5.1	NA. Grade NA.
TCGA-TQ-A7RM		unknown	unknown	Mutant	Gain chr 7 & loss chr 10	unknown	WT	0	1	1	non-codel	WT	Methylated	5.1	NA. Grade NA.
TCGA-TQ-A7RN		unknown	unknown	Mutant	No combined CNA	unknown	WT	0	0	0	codel	WT	Methylated	5.1	NA. Grade NA.
TCGA-TQ-A7RO		unknown	unknown	Mutant	No combined CNA	unknown	WT	0	0	0	codel	WT	Methylated	5.1	NA. Grade NA.
TCGA-28-2510		unknown	unknown	WT	No combined CNA	unknown	WT	1	-2	-2	non-codel	WT	Unmethylated	5.1	NA. Grade NA.
TCGA-TQ-A7RQ		unknown	unknown	Mutant	No combined CNA	unknown	WT	0	0	0	codel	WT	Methylated	5.1	NA. Grade NA.
TCGA-TQ-A7RR		unknown	unknown	Mutant	No combined CNA	unknown	Mutant	0	0	0	non-codel	WT	Unmethylated	5.1	NA. Grade NA.
TCGA-TQ-A7RS		unknown	unknown	Mutant	No combined CNA	unknown	WT	0	0	0	codel	WT	Methylated	5.1	NA. Grade NA.
TCGA-TQ-A7RU		unknown	unknown	Mutant	No combined CNA	unknown	WT	0	0	0	codel	WT	Methylated	5.1	NA. Grade NA.
TCGA-TQ-A7RV		unknown	unknown	Mutant	No combined CNA	WT	Mutant	0	0	0	non-codel	WT	Methylated	5.1	NA. Grade NA.
TCGA-TQ-A7RW		unknown	unknown	Mutant	No combined CNA	unknown	WT	0	-1	-1	non-codel	WT	Methylated	5.1	NA. Grade NA.
TCGA-TQ-A8XE		unknown	unknown	Mutant	No combined CNA	WT	WT	0	-1	-1	non-codel	WT	Methylated	5.1	NA. Grade NA.
TCGA-VM-A8C8	50	oligodendroglioma	G2	Mutant	No combined CNA	unknown	Mutant	0	-1	-1	non-codel	WT	Unmethylated	1.6	Astrocytoma, IDH-mutant. Grade 2.
TCGA-4W-AA9R		unknown	unknown	WT	unknown	unknown	WT	unknown	unknown	unknown	non-codel	WT	Methylated	5.1	NA. Grade NA.
TCGA-VM-A8CA	54	oligodendroglioma	G2	Mutant	No combined CNA	unknown	WT	0	0	0	non-codel	WT	Methylated	1.6	Astrocytoma, IDH-mutant. Grade 2.
TCGA-VM-A8CB	33	oligodendroglioma	G3	Mutant	No combined CNA	unknown	WT	0	-1	-1	codel	WT	Methylated	1.2	Oligodendroglioma, IDH-mutant, 1p/19q-codeleted. Grade 3.
TCGA-TQ-A7RP		unknown	unknown	WT	No combined CNA	unknown	WT	1	-1	-1	non-codel	WT	Methylated	5.1	NA. Grade NA.
TCGA-VM-A8CE	25	oligodendroglioma	G2	Mutant	No combined CNA	unknown	WT	0	0	0	codel	WT	Methylated	1.1	Oligodendroglioma, IDH-mutant, 1p/19q-codeleted. Grade 2.
TCGA-VM-A8CF		unknown	unknown	Mutant	No combined CNA	unknown	Mutant	0	-1	-1	non-codel	WT	Methylated	5.1	NA. Grade NA.
TCGA-VM-A8CH	24	astrocytoma	G2	Mutant	No combined CNA	unknown	Mutant	0	0	0	non-codel	WT	Unmethylated	2.1	Astrocytoma, IDH-mutant. Grade 2.
TCGA-VV-A829	44	oligoastrocytoma	G3	Mutant	No combined CNA	unknown	WT	0	0	0	codel	WT	Methylated	3.6	Oligodendroglioma, IDH-mutant, 1p/19q-codeleted. Grade 3.
TCGA-VV-A86M	36	astrocytoma	G3	Mutant	No combined CNA	unknown	WT	0	-1	-1	non-codel	WT	Methylated	2.2	Astrocytoma, IDH-mutant. Grade 3.
TCGA-VW-A7QS	35	oligodendroglioma	G3	Mutant	No combined CNA	unknown	WT	0	0	0	codel	WT	Methylated	1.2	Oligodendroglioma, IDH-mutant, 1p/19q-codeleted. Grade 3.
TCGA-VW-A8FI	66	astrocytoma	G3	WT	Gain chr 7 & loss chr 10	unknown	WT	1	0	0	non-codel	WT	Unmethylated	2.7	Glioblastoma, IDH-wildtype. Grade 4.
TCGA-W9-A837	47	oligodendroglioma	G2	Mutant	No combined CNA	unknown	WT	0	-1	-1	codel	WT	Methylated	1.1	Oligodendroglioma, IDH-mutant, 1p/19q-codeleted. Grade 2.
TCGA-WH-A86K	65	astrocytoma	G2	Mutant	No combined CNA	unknown	WT	0	-1	-1	non-codel	WT	Methylated	2.1	Astrocytoma, IDH-mutant. Grade 2.
TCGA-WY-A858	32	astrocytoma	G3	Mutant	No combined CNA	unknown	Mutant	0	-1	-1	non-codel	WT	Methylated	2.2	Astrocytoma, IDH-mutant. Grade 3.
TCGA-WY-A859		unknown	unknown	Mutant	No combined CNA	unknown	WT	0	-1	-1	non-codel	WT	Methylated	5.1	NA. Grade NA.
TCGA-WY-A85A		unknown	unknown	Mutant	No combined CNA	unknown	Mutant	0	0	0	non-codel	WT	Methylated	5.1	NA. Grade NA.
TCGA-WY-A85B		unknown	unknown	Mutant	No combined CNA	unknown	Mutant	0	-1	-1	non-codel	WT	Methylated	5.1	NA. Grade NA.
TCGA-WY-A85C		unknown	unknown	Mutant	No combined CNA	unknown	WT	0	0	0	non-codel	WT	Methylated	5.1	NA. Grade NA.
TCGA-WY-A85D		unknown	unknown	Mutant	No combined CNA	unknown	Mutant	0	0	0	non-codel	WT	Unmethylated	5.1	NA. Grade NA.
TCGA-WY-A85E		unknown	unknown	Mutant	No combined CNA	unknown	Mutant	1	0	0	non-codel	WT	Methylated	5.1	NA. Grade NA.
