# Supplementary material for: Reclassification of TCGA Diffuse Glioma Profiles Linked to Transcriptomic, Epigenetic, Genomic and Clinical Data, According to the 2021 WHO CNS Tumor Classification
Source: Int J Mol Sci. 2022 Dec 21;24(1):157. doi: 10.3390/ijms24010157 (PMC9820617; doi:10.3390/ijms24010157)
Supplement: Supplementary file 1 [file ijms-24-00157-s001.zip › ijms-2057006_Table S4.xlsx]

## Sheet: Dendro_Methylation
Number	Case_ID	Sample_ID	Cluster	Aliquots	TCGA Histology	TCGA Grade	Category (Table S1)	WHO_CNS5_diagnosis
1	TCGA-06-0130	TCGA-06-0130-01A	mC1	no	glioblastoma	G4	4.2	Glioblastoma, IDH-wildtype. Grade 4.
2	TCGA-06-0141	TCGA-06-0141-01A	mC1	no	glioblastoma	G4	4.2	Glioblastoma, IDH-wildtype. Grade 4.
3	TCGA-06-0139	TCGA-06-0139-01A	mC1	no	glioblastoma	G4	4.2	Glioblastoma, IDH-wildtype. Grade 4.
4	TCGA-06-5410	TCGA-06-5410-01A	mC1	no	glioblastoma	G4	4.2	Glioblastoma, IDH-wildtype. Grade 4.
5	TCGA-DU-5872	TCGA-DU-5872-02A	mC1	yes	oligoastrocytoma	G2	3.1	Astrocytoma, IDH-mutant. Grade 2.
6	TCGA-06-5412	TCGA-06-5412-01A	mC1	no	glioblastoma	G4	4.2	Glioblastoma, IDH-wildtype. Grade 4.
7	TCGA-S9-A6UA	TCGA-S9-A6UA-01A	mC1	no	astrocytoma	G3	2.9	NA. Grade NA.
8	TCGA-HT-7857	TCGA-HT-7857-01A	mC1	no	astrocytoma	G3	2.9	NA. Grade NA.
9	TCGA-28-5218	TCGA-28-5218-01A	mC1	no	glioblastoma	G4	4.2	Glioblastoma, IDH-wildtype. Grade 4.
10	TCGA-14-0781	TCGA-14-0781-01B	mC1	no	glioblastoma	G4	4.2	Glioblastoma, IDH-wildtype. Grade 4.
11	TCGA-06-0171	TCGA-06-0171-02A	mC1	no	glioblastoma	G4	4.1	Glioblastoma, IDH-wildtype. Grade 4.
12	TCGA-HT-7882	TCGA-HT-7882-01A	mC1	no	oligodendroglioma	G3	1.10	Glioblastoma, IDH-wildtype. Grade 4.
13	TCGA-19-1389	TCGA-19-1389-02A	mC1	no	glioblastoma	G4	4.1	Glioblastoma, IDH-wildtype. Grade 4.
14	TCGA-28-5213	TCGA-28-5213-01A	mC1	no	glioblastoma	G4	4.1	Glioblastoma, IDH-wildtype. Grade 4.
15	TCGA-CS-4941	TCGA-CS-4941-01A	mC1	no	astrocytoma	G3	2.7	Glioblastoma, IDH-wildtype. Grade 4.
16	TCGA-14-0736	TCGA-14-0736-02A	mC1	no	glioblastoma	G4	4.1	Glioblastoma, IDH-wildtype. Grade 4.
17	TCGA-HT-8110	TCGA-HT-8110-01A	mC1	no	astrocytoma	G3	2.7	Glioblastoma, IDH-wildtype. Grade 4.
18	TCGA-S9-A6U0	TCGA-S9-A6U0-01A	mC1	no	astrocytoma	G3	2.7	Glioblastoma, IDH-wildtype. Grade 4.
19	TCGA-06-0190	TCGA-06-0190-01A	mC1	yes	glioblastoma	G4	4.1	Glioblastoma, IDH-wildtype. Grade 4.
20	TCGA-06-0190	TCGA-06-0190-02A	mC1	yes	glioblastoma	G4	4.1	Glioblastoma, IDH-wildtype. Grade 4.
21	TCGA-19-4065	TCGA-19-4065-01A	mC1	yes	glioblastoma	G4	4.1	Glioblastoma, IDH-wildtype. Grade 4.
22	TCGA-19-4065	TCGA-19-4065-02A	mC1	yes	glioblastoma	G4	4.1	Glioblastoma, IDH-wildtype. Grade 4.
23	TCGA-DB-A75P	TCGA-DB-A75P-01A	mC1	no	astrocytoma	G2	2.8	NA. Grade NA.
24	TCGA-HT-8558	TCGA-HT-8558-01A	mC1	no	oligodendroglioma	G2	1.11	NA. Grade NA.
25	TCGA-CS-6669	TCGA-CS-6669-01A	mC1	no	oligodendroglioma	G2	1.11	NA. Grade NA.
26	TCGA-HT-8019	TCGA-HT-8019-01A	mC1	no	oligodendroglioma	G3	1.12	NA. Grade NA.
27	TCGA-VM-A8C9	TCGA-VM-A8C9-01A	mC1	no	astrocytoma	G2	2.8	NA. Grade NA.
28	TCGA-HT-7691	TCGA-HT-7691-01A	mC1	no	astrocytoma	G2	2.8	NA. Grade NA.
29	TCGA-HT-7680	TCGA-HT-7680-01A	mC1	no	astrocytoma	G2	2.8	NA. Grade NA.
30	TCGA-CS-5397	TCGA-CS-5397-01A	mC1	no	astrocytoma	G3	2.7	Glioblastoma, IDH-wildtype. Grade 4.
31	TCGA-DU-5854	TCGA-DU-5854-01A	mC1	no	astrocytoma	G3	2.7	Glioblastoma, IDH-wildtype. Grade 4.
32	TCGA-FG-6688	TCGA-FG-6688-01A	mC1	no	astrocytoma	G3	2.7	Glioblastoma, IDH-wildtype. Grade 4.
33	TCGA-FG-7643	TCGA-FG-7643-01A	mC1	no	oligoastrocytoma	G2	3.12	Glioblastoma, IDH-wildtype. Grade 4.
34	TCGA-DU-8162	TCGA-DU-8162-01A	mC1	no	oligoastrocytoma	G3	3.12	Glioblastoma, IDH-wildtype. Grade 4.
35	TCGA-DU-6404	TCGA-DU-6404-01A	mC1	yes	oligodendroglioma	G3	1.12	NA. Grade NA.
36	TCGA-DU-6404	TCGA-DU-6404-02A	mC1	yes	oligodendroglioma	G3	1.12	NA. Grade NA.
37	TCGA-TM-A84C	TCGA-TM-A84C-01A	mC1	no	astrocytoma	G2	2.10	NA. Grade NA.
38	TCGA-HT-8564	TCGA-HT-8564-01A	mC1	no	astrocytoma	G3	2.9	NA. Grade NA.
39	TCGA-QH-A6CS	TCGA-QH-A6CS-01A	mC1	no	astrocytoma	G3	2.7	Glioblastoma, IDH-wildtype. Grade 4.
40	TCGA-HT-8107	TCGA-HT-8107-01A	mC1	no	oligodendroglioma	G2	1.11	NA. Grade NA.
41	TCGA-FG-8181	TCGA-FG-8181-01A	mC1	no	oligoastrocytoma	G3	3.11	NA. Grade NA.
42	TCGA-32-1980	TCGA-32-1980-01A	mC1	no	glioblastoma	G4	4.2	Glioblastoma, IDH-wildtype. Grade 4.
43	TCGA-P5-A5EY	TCGA-P5-A5EY-01A	mC1	no	astrocytoma	G2	2.8	NA. Grade NA.
44	TCGA-HT-8015	TCGA-HT-8015-01B	mC1	no	astrocytoma	G2	2.8	NA. Grade NA.
45	TCGA-DU-6402	TCGA-DU-6402-01A	mC1	no	astrocytoma	G3	2.7	Glioblastoma, IDH-wildtype. Grade 4.
46	TCGA-HT-7854	TCGA-HT-7854-01A	mC1	no	astrocytoma	G2	2.7	Glioblastoma, IDH-wildtype. Grade 4.
47	TCGA-DU-A76K	TCGA-DU-A76K-01A	mC1	no	oligodendroglioma	G2	1.10	Glioblastoma, IDH-wildtype. Grade 4.
48	TCGA-HT-A617	TCGA-HT-A617-01A	mC1	no	oligodendroglioma	G2	1.10	Glioblastoma, IDH-wildtype. Grade 4.
49	TCGA-VM-A8CD	TCGA-VM-A8CD-01A	mC1	no	astrocytoma	G3	2.9	NA. Grade NA.
50	TCGA-DU-A5TT	TCGA-DU-A5TT-01A	mC1	no	oligodendroglioma	G3	1.10	Glioblastoma, IDH-wildtype. Grade 4.
51	TCGA-S9-A7IX	TCGA-S9-A7IX-01A	mC1	no	astrocytoma	G3	2.7	Glioblastoma, IDH-wildtype. Grade 4.
52	TCGA-DB-A64O	TCGA-DB-A64O-01A	mC1	no	oligoastrocytoma	G2	3.12	Glioblastoma, IDH-wildtype. Grade 4.
53	TCGA-S9-A7R2	TCGA-S9-A7R2-01A	mC1	no	astrocytoma	G3	2.7	Glioblastoma, IDH-wildtype. Grade 4.
54	TCGA-HT-A74H	TCGA-HT-A74H-01A	mC1	no	astrocytoma	G3	2.7	Glioblastoma, IDH-wildtype. Grade 4.
55	TCGA-HW-A5KK	TCGA-HW-A5KK-01A	mC1	no	astrocytoma	G3	2.7	Glioblastoma, IDH-wildtype. Grade 4.
56	TCGA-QH-A6CX	TCGA-QH-A6CX-01A	mC1	no	astrocytoma	G2	2.7	Glioblastoma, IDH-wildtype. Grade 4.
57	TCGA-P5-A5F6	TCGA-P5-A5F6-01A	mC1	no	oligodendroglioma	G2	1.11	NA. Grade NA.
58	TCGA-FG-5963	TCGA-FG-5963-02A	mC1	yes	astrocytoma	G3	2.7	Glioblastoma, IDH-wildtype. Grade 4.
59	TCGA-FG-5963	TCGA-FG-5963-01A	mC1	yes	astrocytoma	G3	2.7	Glioblastoma, IDH-wildtype. Grade 4.
60	TCGA-DU-A7TB	TCGA-DU-A7TB-01A	mC1	no	oligodendroglioma	G2	1.11	NA. Grade NA.
61	TCGA-S9-A89V	TCGA-S9-A89V-01A	mC1	no	astrocytoma	G3	2.9	NA. Grade NA.
62	TCGA-06-0125	TCGA-06-0125-01A	mC2	yes	glioblastoma	G4	4.1	Glioblastoma, IDH-wildtype. Grade 4.
63	TCGA-14-1823	TCGA-14-1823-01A	mC2	no	glioblastoma	G4	4.1	Glioblastoma, IDH-wildtype. Grade 4.
64	TCGA-06-2563	TCGA-06-2563-01A	mC2	no	glioblastoma	G4	4.1	Glioblastoma, IDH-wildtype. Grade 4.
65	TCGA-14-0817	TCGA-14-0817-01A	mC2	no	glioblastoma	G4	4.1	Glioblastoma, IDH-wildtype. Grade 4.
66	TCGA-12-3653	TCGA-12-3653-01A	mC2	no	glioblastoma	G4	4.1	Glioblastoma, IDH-wildtype. Grade 4.
67	TCGA-76-4932	TCGA-76-4932-01A	mC2	no	glioblastoma	G4	4.2	Glioblastoma, IDH-wildtype. Grade 4.
68	TCGA-12-5295	TCGA-12-5295-01A	mC2	no	glioblastoma	G4	4.1	Glioblastoma, IDH-wildtype. Grade 4.
69	TCGA-14-0790	TCGA-14-0790-01B	mC2	no	glioblastoma	G4	4.1	Glioblastoma, IDH-wildtype. Grade 4.
70	TCGA-TM-A7C3	TCGA-TM-A7C3-01A	mC2	no	astrocytoma	G3	2.7	Glioblastoma, IDH-wildtype. Grade 4.
71	TCGA-28-5209	TCGA-28-5209-01A	mC2	no	glioblastoma	G4	4.1	Glioblastoma, IDH-wildtype. Grade 4.
72	TCGA-DU-6405	TCGA-DU-6405-01A	mC2	no	astrocytoma	G3	2.7	Glioblastoma, IDH-wildtype. Grade 4.
73	TCGA-12-1597	TCGA-12-1597-01B	mC2	no	glioblastoma	G4	4.2	Glioblastoma, IDH-wildtype. Grade 4.
74	TCGA-41-5651	TCGA-41-5651-01A	mC2	no	glioblastoma	G4	4.1	Glioblastoma, IDH-wildtype. Grade 4.
75	TCGA-12-5299	TCGA-12-5299-01A	mC2	no	glioblastoma	G4	4.1	Glioblastoma, IDH-wildtype. Grade 4.
76	TCGA-HT-7860	TCGA-HT-7860-01A	mC2	no	astrocytoma	G3	2.7	Glioblastoma, IDH-wildtype. Grade 4.
77	TCGA-HT-A5RC	TCGA-HT-A5RC-01A	mC2	no	astrocytoma	G3	2.7	Glioblastoma, IDH-wildtype. Grade 4.
78	TCGA-DU-6406	TCGA-DU-6406-01A	mC2	no	oligoastrocytoma	G3	3.12	Glioblastoma, IDH-wildtype. Grade 4.
79	TCGA-14-1402	TCGA-14-1402-02A	mC2	no	glioblastoma	G4	4.1	Glioblastoma, IDH-wildtype. Grade 4.
80	TCGA-HT-8104	TCGA-HT-8104-01A	mC2	no	astrocytoma	G3	2.7	Glioblastoma, IDH-wildtype. Grade 4.
81	TCGA-06-0125	TCGA-06-0125-02A	mC2	yes	glioblastoma	G4	4.1	Glioblastoma, IDH-wildtype. Grade 4.
82	TCGA-FG-A87Q	TCGA-FG-A87Q-01A	mC2	no	astrocytoma	G3	2.7	Glioblastoma, IDH-wildtype. Grade 4.
83	TCGA-19-2625	TCGA-19-2625-01A	mC2	no	glioblastoma	G4	4.2	Glioblastoma, IDH-wildtype. Grade 4.
84	TCGA-16-1045	TCGA-16-1045-01B	mC2	no	glioblastoma	G4	4.1	Glioblastoma, IDH-wildtype. Grade 4.
85	TCGA-28-2513	TCGA-28-2513-01A	mC2	no	glioblastoma	G4	4.1	Glioblastoma, IDH-wildtype. Grade 4.
86	TCGA-06-2561	TCGA-06-2561-01A	mC2	no	glioblastoma	G4	4.1	Glioblastoma, IDH-wildtype. Grade 4.
87	TCGA-27-1832	TCGA-27-1832-01A	mC2	no	glioblastoma	G4	4.1	Glioblastoma, IDH-wildtype. Grade 4.
88	TCGA-32-4213	TCGA-32-4213-01A	mC2	no	glioblastoma	G4	4.1	Glioblastoma, IDH-wildtype. Grade 4.
89	TCGA-32-1982	TCGA-32-1982-01A	mC2	no	glioblastoma	G4	4.1	Glioblastoma, IDH-wildtype. Grade 4.
90	TCGA-02-0055	TCGA-02-0055-01A	mC2	no	glioblastoma	G4	4.2	Glioblastoma, IDH-wildtype. Grade 4.
91	TCGA-27-1835	TCGA-27-1835-01A	mC2	no	glioblastoma	G4	4.1	Glioblastoma, IDH-wildtype. Grade 4.
92	TCGA-32-2616	TCGA-32-2616-01A	mC2	no	glioblastoma	G4	4.2	Glioblastoma, IDH-wildtype. Grade 4.
93	TCGA-19-2619	TCGA-19-2619-01A	mC2	no	glioblastoma	G4	4.1	Glioblastoma, IDH-wildtype. Grade 4.
94	TCGA-14-2554	TCGA-14-2554-01A	mC2	no	glioblastoma	G4	4.1	Glioblastoma, IDH-wildtype. Grade 4.
95	TCGA-27-2526	TCGA-27-2526-01A	mC2	no	glioblastoma	G4	4.1	Glioblastoma, IDH-wildtype. Grade 4.
96	TCGA-DU-5847	TCGA-DU-5847-01A	mC2	no	astrocytoma	G3	2.7	Glioblastoma, IDH-wildtype. Grade 4.
97	TCGA-DU-8165	TCGA-DU-8165-01A	mC2	no	oligodendroglioma	G3	1.10	Glioblastoma, IDH-wildtype. Grade 4.
98	TCGA-DU-7290	TCGA-DU-7290-01A	mC2	no	astrocytoma	G3	2.7	Glioblastoma, IDH-wildtype. Grade 4.
99	TCGA-41-4097	TCGA-41-4097-01A	mC2	no	glioblastoma	G4	4.2	Glioblastoma, IDH-wildtype. Grade 4.
100	TCGA-76-4928	TCGA-76-4928-01B	mC2	no	glioblastoma	G4	4.1	Glioblastoma, IDH-wildtype. Grade 4.
101	TCGA-P5-A72U	TCGA-P5-A72U-01A	mC2	no	oligodendroglioma	G3	1.10	Glioblastoma, IDH-wildtype. Grade 4.
102	TCGA-DU-8161	TCGA-DU-8161-01A	mC2	no	oligoastrocytoma	G3	3.12	Glioblastoma, IDH-wildtype. Grade 4.
103	TCGA-DU-8158	TCGA-DU-8158-01A	mC2	no	astrocytoma	G3	2.7	Glioblastoma, IDH-wildtype. Grade 4.
104	TCGA-DU-7006	TCGA-DU-7006-01A	mC2	no	astrocytoma	G3	2.7	Glioblastoma, IDH-wildtype. Grade 4.
105	TCGA-DU-7012	TCGA-DU-7012-01A	mC2	no	astrocytoma	G3	2.7	Glioblastoma, IDH-wildtype. Grade 4.
106	TCGA-S9-A6WM	TCGA-S9-A6WM-01A	mC2	no	astrocytoma	G3	2.7	Glioblastoma, IDH-wildtype. Grade 4.
107	TCGA-76-4931	TCGA-76-4931-01A	mC2	no	glioblastoma	G4	4.1	Glioblastoma, IDH-wildtype. Grade 4.
108	TCGA-26-5139	TCGA-26-5139-01A	mC2	no	glioblastoma	G4	4.1	Glioblastoma, IDH-wildtype. Grade 4.
109	TCGA-KT-A7W1	TCGA-KT-A7W1-01A	mC2	no	astrocytoma	G3	2.7	Glioblastoma, IDH-wildtype. Grade 4.
110	TCGA-HT-A5RA	TCGA-HT-A5RA-01A	mC2	no	astrocytoma	G3	2.7	Glioblastoma, IDH-wildtype. Grade 4.
111	TCGA-06-5408	TCGA-06-5408-01A	mC2	no	glioblastoma	G4	4.1	Glioblastoma, IDH-wildtype. Grade 4.
112	TCGA-DU-5852	TCGA-DU-5852-01A	mC2	no	oligoastrocytoma	G3	3.12	Glioblastoma, IDH-wildtype. Grade 4.
113	TCGA-HT-A4DS	TCGA-HT-A4DS-01A	mC2	no	astrocytoma	G3	2.7	Glioblastoma, IDH-wildtype. Grade 4.
114	TCGA-DU-A5TY	TCGA-DU-A5TY-01A	mC2	no	astrocytoma	G3	2.7	Glioblastoma, IDH-wildtype. Grade 4.
115	TCGA-FG-A70Z	TCGA-FG-A70Z-01A	mC2	no	oligoastrocytoma	G3	3.12	Glioblastoma, IDH-wildtype. Grade 4.
116	TCGA-06-1804	TCGA-06-1804-01A	mC2	no	glioblastoma	G4	4.1	Glioblastoma, IDH-wildtype. Grade 4.
117	TCGA-26-5136	TCGA-26-5136-01B	mC2	no	glioblastoma	G4	4.1	Glioblastoma, IDH-wildtype. Grade 4.
118	TCGA-14-1034	TCGA-14-1034-02B	mC2	yes	glioblastoma	G4	4.1	Glioblastoma, IDH-wildtype. Grade 4.
119	TCGA-14-1034	TCGA-14-1034-01A	mC2	yes	glioblastoma	G4	4.1	Glioblastoma, IDH-wildtype. Grade 4.
120	TCGA-28-2509	TCGA-28-2509-01A	mC2	no	glioblastoma	G4	4.1	Glioblastoma, IDH-wildtype. Grade 4.
121	TCGA-19-1787	TCGA-19-1787-01B	mC2	no	glioblastoma	G4	4.1	Glioblastoma, IDH-wildtype. Grade 4.
122	TCGA-DU-6404	TCGA-DU-6404-02B	mC2	yes	oligodendroglioma	G3	1.12	NA. Grade NA.
123	TCGA-06-2569	TCGA-06-2569-01A	mC2	no	glioblastoma	G4	4.2	Glioblastoma, IDH-wildtype. Grade 4.
124	TCGA-14-0871	TCGA-14-0871-01A	mC2	no	glioblastoma	G4	4.1	Glioblastoma, IDH-wildtype. Grade 4.
125	TCGA-06-5416	TCGA-06-5416-01A	mC2	no	glioblastoma	G4	4.2	Glioblastoma, IDH-wildtype. Grade 4.
126	TCGA-02-0047	TCGA-02-0047-01A	mC2	no	glioblastoma	G4	4.2	Glioblastoma, IDH-wildtype. Grade 4.
127	TCGA-TM-A84J	TCGA-TM-A84J-01A	mC2	no	oligodendroglioma	G3	1.12	NA. Grade NA.
128	TCGA-DH-5140	TCGA-DH-5140-01A	mC2	no	oligoastrocytoma	G3	3.11	NA. Grade NA.
129	TCGA-12-0821	TCGA-12-0821-01A	mC2	no	glioblastoma	G4	4.1	Glioblastoma, IDH-wildtype. Grade 4.
130	TCGA-14-1825	TCGA-14-1825-01A	mC2	no	glioblastoma	G4	4.1	Glioblastoma, IDH-wildtype. Grade 4.
131	TCGA-28-5216	TCGA-28-5216-01A	mC2	no	glioblastoma	G4	4.2	Glioblastoma, IDH-wildtype. Grade 4.
132	TCGA-26-5134	TCGA-26-5134-01A	mC2	no	glioblastoma	G4	4.2	Glioblastoma, IDH-wildtype. Grade 4.
133	TCGA-HT-7469	TCGA-HT-7469-01A	mC2	no	oligodendroglioma	G3	1.13	NA. Grade NA.
134	TCGA-19-1390	TCGA-19-1390-01A	mC2	no	glioblastoma	G4	4.2	Glioblastoma, IDH-wildtype. Grade 4.
135	TCGA-DU-6392	TCGA-DU-6392-01A	mC2	no	astrocytoma	G3	2.9	NA. Grade NA.
136	TCGA-26-5135	TCGA-26-5135-01A	mC2	no	glioblastoma	G4	4.1	Glioblastoma, IDH-wildtype. Grade 4.
137	TCGA-06-0210	TCGA-06-0210-01A	mC2	yes	glioblastoma	G4	4.1	Glioblastoma, IDH-wildtype. Grade 4.
138	TCGA-06-0210	TCGA-06-0210-02A	mC2	yes	glioblastoma	G4	4.1	Glioblastoma, IDH-wildtype. Grade 4.
139	TCGA-76-4929	TCGA-76-4929-01A	mC2	no	glioblastoma	G4	4.1	Glioblastoma, IDH-wildtype. Grade 4.
140	TCGA-28-5215	TCGA-28-5215-01A	mC2	no	glioblastoma	G4	4.2	Glioblastoma, IDH-wildtype. Grade 4.
141	TCGA-19-0957	TCGA-19-0957-02A	mC2	no	glioblastoma	G4	4.1	Glioblastoma, IDH-wildtype. Grade 4.
142	TCGA-DU-6403	TCGA-DU-6403-01A	mC2	no	oligoastrocytoma	G3	3.12	Glioblastoma, IDH-wildtype. Grade 4.
143	TCGA-28-5208	TCGA-28-5208-01A	mC2	no	glioblastoma	G4	4.2	Glioblastoma, IDH-wildtype. Grade 4.
144	TCGA-32-5222	TCGA-32-5222-01A	mC2	no	glioblastoma	G4	4.1	Glioblastoma, IDH-wildtype. Grade 4.
145	TCGA-FG-A4MW	TCGA-FG-A4MW-01A	mC2	no	oligoastrocytoma	G3	3.12	Glioblastoma, IDH-wildtype. Grade 4.
146	TCGA-06-5856	TCGA-06-5856-01A	mC2	no	glioblastoma	G4	4.1	Glioblastoma, IDH-wildtype. Grade 4.
147	TCGA-28-5204	TCGA-28-5204-01A	mC2	no	glioblastoma	G4	4.1	Glioblastoma, IDH-wildtype. Grade 4.
148	TCGA-VW-A8FI	TCGA-VW-A8FI-01A	mC2	no	astrocytoma	G3	2.7	Glioblastoma, IDH-wildtype. Grade 4.
149	TCGA-DU-7292	TCGA-DU-7292-01A	mC2	no	astrocytoma	G3	2.7	Glioblastoma, IDH-wildtype. Grade 4.
150	TCGA-06-0211	TCGA-06-0211-02A	mC2	yes	glioblastoma	G4	4.1	Glioblastoma, IDH-wildtype. Grade 4.
151	TCGA-06-0211	TCGA-06-0211-01A	mC2	yes	glioblastoma	G4	4.1	Glioblastoma, IDH-wildtype. Grade 4.
152	TCGA-06-0152	TCGA-06-0152-02A	mC2	no	glioblastoma	G4	4.1	Glioblastoma, IDH-wildtype. Grade 4.
153	TCGA-06-5414	TCGA-06-5414-01A	mC2	no	glioblastoma	G4	4.1	Glioblastoma, IDH-wildtype. Grade 4.
154	TCGA-26-5132	TCGA-26-5132-01A	mC2	no	glioblastoma	G4	4.1	Glioblastoma, IDH-wildtype. Grade 4.
155	TCGA-76-4925	TCGA-76-4925-01A	mC2	no	glioblastoma	G4	4.1	Glioblastoma, IDH-wildtype. Grade 4.
156	TCGA-CS-6186	TCGA-CS-6186-01A	mC2	no	oligoastrocytoma	G3	3.12	Glioblastoma, IDH-wildtype. Grade 4.
157	TCGA-QH-A6CV	TCGA-QH-A6CV-01A	mC2	no	oligoastrocytoma	G3	3.12	Glioblastoma, IDH-wildtype. Grade 4.
158	TCGA-TM-A84B	TCGA-TM-A84B-01A	mC2	no	astrocytoma	G3	2.7	Glioblastoma, IDH-wildtype. Grade 4.
159	TCGA-FG-6692	TCGA-FG-6692-01A	mC2	no	oligodendroglioma	G3	1.10	Glioblastoma, IDH-wildtype. Grade 4.
160	TCGA-DU-A7TJ	TCGA-DU-A7TJ-01A	mC2	no	astrocytoma	G3	2.7	Glioblastoma, IDH-wildtype. Grade 4.
161	TCGA-FG-A4MU	TCGA-FG-A4MU-01B	mC2	no	oligoastrocytoma	G3	3.12	Glioblastoma, IDH-wildtype. Grade 4.
162	TCGA-06-5413	TCGA-06-5413-01A	mC2	no	glioblastoma	G4	4.1	Glioblastoma, IDH-wildtype. Grade 4.
163	TCGA-CS-6188	TCGA-CS-6188-01A	mC2	no	astrocytoma	G3	2.7	Glioblastoma, IDH-wildtype. Grade 4.
164	TCGA-DU-A76L	TCGA-DU-A76L-01A	mC2	no	oligodendroglioma	G3	1.10	Glioblastoma, IDH-wildtype. Grade 4.
165	TCGA-76-4927	TCGA-76-4927-01A	mC2	no	glioblastoma	G4	4.2	Glioblastoma, IDH-wildtype. Grade 4.
166	TCGA-QH-A6XC	TCGA-QH-A6XC-01A	mC2	no	astrocytoma	G3	2.7	Glioblastoma, IDH-wildtype. Grade 4.
167	TCGA-06-5418	TCGA-06-5418-01A	mC2	no	glioblastoma	G4	4.1	Glioblastoma, IDH-wildtype. Grade 4.
168	TCGA-CS-5395	TCGA-CS-5395-01A	mC2	no	oligodendroglioma	G2	1.10	Glioblastoma, IDH-wildtype. Grade 4.
169	TCGA-28-5220	TCGA-28-5220-01A	mC2	no	glioblastoma	G4	4.1	Glioblastoma, IDH-wildtype. Grade 4.
170	TCGA-HT-A61C	TCGA-HT-A61C-01A	mC2	no	oligodendroglioma	G3	1.10	Glioblastoma, IDH-wildtype. Grade 4.
171	TCGA-06-5411	TCGA-06-5411-01A	mC2	no	glioblastoma	G4	4.1	Glioblastoma, IDH-wildtype. Grade 4.
172	TCGA-DU-A7TD	TCGA-DU-A7TD-01A	mC2	no	oligoastrocytoma	G3	3.12	Glioblastoma, IDH-wildtype. Grade 4.
173	TCGA-28-5207	TCGA-28-5207-01A	mC2	no	glioblastoma	G4	4.1	Glioblastoma, IDH-wildtype. Grade 4.
174	TCGA-76-4926	TCGA-76-4926-01B	mC2	no	glioblastoma	G4	4.1	Glioblastoma, IDH-wildtype. Grade 4.
175	TCGA-HT-8011	TCGA-HT-8011-01A	mC2	no	astrocytoma	G3	2.7	Glioblastoma, IDH-wildtype. Grade 4.
176	TCGA-DU-7013	TCGA-DU-7013-01A	mC2	no	astrocytoma	G3	2.7	Glioblastoma, IDH-wildtype. Grade 4.
177	TCGA-06-5859	TCGA-06-5859-01A	mC2	no	glioblastoma	G4	4.1	Glioblastoma, IDH-wildtype. Grade 4.
178	TCGA-32-2634	TCGA-32-2634-01A	mC2	no	glioblastoma	G4	4.2	Glioblastoma, IDH-wildtype. Grade 4.
179	TCGA-02-2485	TCGA-02-2485-01A	mC2	no	glioblastoma	G4	4.1	Glioblastoma, IDH-wildtype. Grade 4.
180	TCGA-14-0787	TCGA-14-0787-01A	mC2	no	glioblastoma	G4	4.1	Glioblastoma, IDH-wildtype. Grade 4.
181	TCGA-02-2486	TCGA-02-2486-01A	mC2	no	glioblastoma	G4	4.1	Glioblastoma, IDH-wildtype. Grade 4.
182	TCGA-06-2562	TCGA-06-2562-01A	mC2	no	glioblastoma	G4	4.1	Glioblastoma, IDH-wildtype. Grade 4.
183	TCGA-32-2638	TCGA-32-2638-01A	mC2	no	glioblastoma	G4	4.1	Glioblastoma, IDH-wildtype. Grade 4.
184	TCGA-19-2620	TCGA-19-2620-01A	mC2	no	glioblastoma	G4	4.1	Glioblastoma, IDH-wildtype. Grade 4.
185	TCGA-27-2524	TCGA-27-2524-01A	mC2	no	glioblastoma	G4	4.1	Glioblastoma, IDH-wildtype. Grade 4.
186	TCGA-27-2528	TCGA-27-2528-01A	mC2	no	glioblastoma	G4	4.1	Glioblastoma, IDH-wildtype. Grade 4.
187	TCGA-32-2632	TCGA-32-2632-01A	mC2	no	glioblastoma	G4	4.1	Glioblastoma, IDH-wildtype. Grade 4.
188	TCGA-27-2523	TCGA-27-2523-01A	mC2	no	glioblastoma	G4	4.1	Glioblastoma, IDH-wildtype. Grade 4.
189	TCGA-06-2565	TCGA-06-2565-01A	mC2	no	glioblastoma	G4	4.1	Glioblastoma, IDH-wildtype. Grade 4.
190	TCGA-28-2499	TCGA-28-2499-01A	mC2	no	glioblastoma	G4	4.2	Glioblastoma, IDH-wildtype. Grade 4.
191	TCGA-41-2572	TCGA-41-2572-01A	mC2	no	glioblastoma	G4	4.1	Glioblastoma, IDH-wildtype. Grade 4.
192	TCGA-06-2557	TCGA-06-2557-01A	mC2	no	glioblastoma	G4	4.1	Glioblastoma, IDH-wildtype. Grade 4.
193	TCGA-12-3650	TCGA-12-3650-01A	mC2	no	glioblastoma	G4	4.1	Glioblastoma, IDH-wildtype. Grade 4.
194	TCGA-12-3652	TCGA-12-3652-01A	mC2	no	glioblastoma	G4	4.1	Glioblastoma, IDH-wildtype. Grade 4.
195	TCGA-06-2558	TCGA-06-2558-01A	mC2	no	glioblastoma	G4	4.1	Glioblastoma, IDH-wildtype. Grade 4.
196	TCGA-27-1837	TCGA-27-1837-01A	mC2	no	glioblastoma	G4	4.1	Glioblastoma, IDH-wildtype. Grade 4.
197	TCGA-06-2559	TCGA-06-2559-01A	mC2	no	glioblastoma	G4	4.2	Glioblastoma, IDH-wildtype. Grade 4.
198	TCGA-19-2624	TCGA-19-2624-01A	mC2	no	glioblastoma	G4	4.1	Glioblastoma, IDH-wildtype. Grade 4.
199	TCGA-27-2519	TCGA-27-2519-01A	mC2	no	glioblastoma	G4	4.1	Glioblastoma, IDH-wildtype. Grade 4.
200	TCGA-27-1834	TCGA-27-1834-01A	mC2	no	glioblastoma	G4	4.1	Glioblastoma, IDH-wildtype. Grade 4.
201	TCGA-41-3915	TCGA-41-3915-01A	mC2	no	glioblastoma	G4	4.1	Glioblastoma, IDH-wildtype. Grade 4.
202	TCGA-27-1830	TCGA-27-1830-01A	mC2	no	glioblastoma	G4	4.1	Glioblastoma, IDH-wildtype. Grade 4.
203	TCGA-41-2571	TCGA-41-2571-01A	mC2	no	glioblastoma	G4	4.1	Glioblastoma, IDH-wildtype. Grade 4.
204	TCGA-16-0846	TCGA-16-0846-01A	mC2	no	glioblastoma	G4	4.1	Glioblastoma, IDH-wildtype. Grade 4.
205	TCGA-06-5858	TCGA-06-5858-01A	mC2	no	glioblastoma	G4	4.2	Glioblastoma, IDH-wildtype. Grade 4.
206	TCGA-32-2615	TCGA-32-2615-01A	mC2	no	glioblastoma	G4	4.1	Glioblastoma, IDH-wildtype. Grade 4.
207	TCGA-06-0882	TCGA-06-0882-01A	mC2	no	glioblastoma	G4	4.1	Glioblastoma, IDH-wildtype. Grade 4.
208	TCGA-14-1829	TCGA-14-1829-01A	mC2	no	glioblastoma	G4	4.1	Glioblastoma, IDH-wildtype. Grade 4.
209	TCGA-28-2514	TCGA-28-2514-01A	mC2	no	glioblastoma	G4	4.1	Glioblastoma, IDH-wildtype. Grade 4.
210	TCGA-06-2567	TCGA-06-2567-01A	mC2	no	glioblastoma	G4	4.1	Glioblastoma, IDH-wildtype. Grade 4.
211	TCGA-06-2564	TCGA-06-2564-01A	mC2	no	glioblastoma	G4	4.1	Glioblastoma, IDH-wildtype. Grade 4.
212	TCGA-14-0789	TCGA-14-0789-01A	mC2	no	glioblastoma	G4	4.1	Glioblastoma, IDH-wildtype. Grade 4.
213	TCGA-28-1753	TCGA-28-1753-01A	mC2	no	glioblastoma	G4	4.1	Glioblastoma, IDH-wildtype. Grade 4.
214	TCGA-27-1831	TCGA-27-1831-01A	mC2	no	glioblastoma	G4	4.1	Glioblastoma, IDH-wildtype. Grade 4.
215	TCGA-32-1970	TCGA-32-1970-01A	mC2	no	glioblastoma	G4	4.1	Glioblastoma, IDH-wildtype. Grade 4.
216	TCGA-28-1747	TCGA-28-1747-01C	mC2	no	glioblastoma	G4	4.1	Glioblastoma, IDH-wildtype. Grade 4.
217	TCGA-06-0878	TCGA-06-0878-01A	mC2	no	glioblastoma	G4	4.1	Glioblastoma, IDH-wildtype. Grade 4.
218	TCGA-DU-6407	TCGA-DU-6407-02B	mC3	yes	oligodendroglioma	G2	1.8	Astrocytoma, IDH-mutant. Grade 4.
219	TCGA-DU-7010	TCGA-DU-7010-01A	mC3	no	astrocytoma	G3	2.2	Astrocytoma, IDH-mutant. Grade 3.
220	TCGA-FG-A6J3	TCGA-FG-A6J3-01A	mC3	no	astrocytoma	G3	2.2	Astrocytoma, IDH-mutant. Grade 3.
221	TCGA-S9-A7IS	TCGA-S9-A7IS-01A	mC3	no	astrocytoma	G3	2.3	Astrocytoma, IDH-mutant. Grade 4.
222	TCGA-06-5417	TCGA-06-5417-01A	mC3	no	glioblastoma	G4	4.7	NA. Grade NA.
223	TCGA-06-0221	TCGA-06-0221-02A	mC3	no	glioblastoma	G4	4.5	Astrocytoma, IDH-mutant. Grade 4.
224	TCGA-E1-A7YV	TCGA-E1-A7YV-01A	mC3	no	oligoastrocytoma	G3	3.2	Astrocytoma, IDH-mutant. Grade 3.
225	TCGA-06-0129	TCGA-06-0129-01A	mC3	no	glioblastoma	G4	4.5	Astrocytoma, IDH-mutant. Grade 4.
226	TCGA-06-2570	TCGA-06-2570-01A	mC3	no	glioblastoma	G4	4.5	Astrocytoma, IDH-mutant. Grade 4.
227	TCGA-26-5133	TCGA-26-5133-01A	mC3	no	glioblastoma	G4	4.2	Glioblastoma, IDH-wildtype. Grade 4.
228	TCGA-DU-7304	TCGA-DU-7304-02A	mC3	yes	oligoastrocytoma	G3	3.2	Astrocytoma, IDH-mutant. Grade 3.
229	TCGA-27-2521	TCGA-27-2521-01A	mC3	no	glioblastoma	G4	4.5	Astrocytoma, IDH-mutant. Grade 4.
230	TCGA-19-2629	TCGA-19-2629-01A	mC3	no	glioblastoma	G4	4.5	Astrocytoma, IDH-mutant. Grade 4.
231	TCGA-02-2483	TCGA-02-2483-01A	mC3	no	glioblastoma	G4	4.5	Astrocytoma, IDH-mutant. Grade 4.
232	TCGA-HT-7880	TCGA-HT-7880-01A	mC3	no	oligoastrocytoma	G2	3.1	Astrocytoma, IDH-mutant. Grade 2.
233	TCGA-HT-7602	TCGA-HT-7602-01A	mC3	no	oligodendroglioma	G2	1.6	Astrocytoma, IDH-mutant. Grade 2.
234	TCGA-HT-7856	TCGA-HT-7856-01A	mC3	no	oligodendroglioma	G3	1.2	Oligodendroglioma, IDH-mutant, 1p/19q-codeleted. Grade 3.
235	TCGA-TM-A84R	TCGA-TM-A84R-01A	mC3	no	oligodendroglioma	G2	1.1	Oligodendroglioma, IDH-mutant, 1p/19q-codeleted. Grade 2.
236	TCGA-DU-A7TG	TCGA-DU-A7TG-01A	mC3	no	oligodendroglioma	G2	1.6	Astrocytoma, IDH-mutant. Grade 2.
237	TCGA-FG-5964	TCGA-FG-5964-01A	mC3	no	oligodendroglioma	G2	1.1	Oligodendroglioma, IDH-mutant, 1p/19q-codeleted. Grade 2.
238	TCGA-DB-A64V	TCGA-DB-A64V-01A	mC3	no	oligodendroglioma	G2	1.1	Oligodendroglioma, IDH-mutant, 1p/19q-codeleted. Grade 2.
239	TCGA-HT-7694	TCGA-HT-7694-01A	mC3	no	oligodendroglioma	G3	1.2	Oligodendroglioma, IDH-mutant, 1p/19q-codeleted. Grade 3.
240	TCGA-HT-7467	TCGA-HT-7467-01A	mC3	no	oligodendroglioma	G2	1.1	Oligodendroglioma, IDH-mutant, 1p/19q-codeleted. Grade 2.
241	TCGA-HT-7620	TCGA-HT-7620-01A	mC3	no	oligodendroglioma	G3	1.2	Oligodendroglioma, IDH-mutant, 1p/19q-codeleted. Grade 3.
242	TCGA-HT-7881	TCGA-HT-7881-01A	mC3	no	oligodendroglioma	G2	1.1	Oligodendroglioma, IDH-mutant, 1p/19q-codeleted. Grade 2.
243	TCGA-HT-7481	TCGA-HT-7481-01A	mC3	no	oligodendroglioma	G2	1.1	Oligodendroglioma, IDH-mutant, 1p/19q-codeleted. Grade 2.
244	TCGA-HW-7486	TCGA-HW-7486-01A	mC3	no	oligodendroglioma	G2	1.1	Oligodendroglioma, IDH-mutant, 1p/19q-codeleted. Grade 2.
245	TCGA-HT-7605	TCGA-HT-7605-01A	mC3	no	oligodendroglioma	G2	1.1	Oligodendroglioma, IDH-mutant, 1p/19q-codeleted. Grade 2.
246	TCGA-DU-5853	TCGA-DU-5853-01A	mC3	no	oligoastrocytoma	G2	3.1	Astrocytoma, IDH-mutant. Grade 2.
247	TCGA-CS-6290	TCGA-CS-6290-01A	mC3	no	astrocytoma	G3	2.2	Astrocytoma, IDH-mutant. Grade 3.
248	TCGA-HT-7479	TCGA-HT-7479-01A	mC3	no	astrocytoma	G3	2.2	Astrocytoma, IDH-mutant. Grade 3.
249	TCGA-FG-6689	TCGA-FG-6689-01A	mC3	no	astrocytoma	G2	2.1	Astrocytoma, IDH-mutant. Grade 2.
250	TCGA-HT-7474	TCGA-HT-7474-01A	mC3	no	oligoastrocytoma	G2	3.1	Astrocytoma, IDH-mutant. Grade 2.
251	TCGA-DU-8163	TCGA-DU-8163-01A	mC3	no	oligoastrocytoma	G3	3.2	Astrocytoma, IDH-mutant. Grade 3.
252	TCGA-HW-7489	TCGA-HW-7489-01A	mC3	no	oligoastrocytoma	G2	3.1	Astrocytoma, IDH-mutant. Grade 2.
253	TCGA-HT-7603	TCGA-HT-7603-01A	mC3	no	oligodendroglioma	G2	1.6	Astrocytoma, IDH-mutant. Grade 2.
254	TCGA-FG-8182	TCGA-FG-8182-01A	mC3	no	oligodendroglioma	G2	1.6	Astrocytoma, IDH-mutant. Grade 2.
255	TCGA-FG-8191	TCGA-FG-8191-01A	mC3	no	oligodendroglioma	G3	1.7	Astrocytoma, IDH-mutant. Grade 3.
256	TCGA-DB-A75O	TCGA-DB-A75O-01A	mC3	no	astrocytoma	G3	2.2	Astrocytoma, IDH-mutant. Grade 3.
257	TCGA-DB-A4XC	TCGA-DB-A4XC-01A	mC3	no	oligoastrocytoma	G2	3.1	Astrocytoma, IDH-mutant. Grade 2.
258	TCGA-HT-7473	TCGA-HT-7473-01A	mC3	no	oligoastrocytoma	G2	3.1	Astrocytoma, IDH-mutant. Grade 2.
259	TCGA-HT-8111	TCGA-HT-8111-01A	mC3	no	oligoastrocytoma	G3	3.2	Astrocytoma, IDH-mutant. Grade 3.
260	TCGA-HT-7478	TCGA-HT-7478-01A	mC3	no	astrocytoma	G2	2.1	Astrocytoma, IDH-mutant. Grade 2.
261	TCGA-DU-7011	TCGA-DU-7011-01A	mC3	no	oligoastrocytoma	G2	3.1	Astrocytoma, IDH-mutant. Grade 2.
262	TCGA-TM-A84L	TCGA-TM-A84L-01A	mC3	no	oligoastrocytoma	G2	3.1	Astrocytoma, IDH-mutant. Grade 2.
263	TCGA-S9-A6WG	TCGA-S9-A6WG-01A	mC3	no	astrocytoma	G3	2.2	Astrocytoma, IDH-mutant. Grade 3.
264	TCGA-P5-A72X	TCGA-P5-A72X-01A	mC3	no	astrocytoma	G3	2.2	Astrocytoma, IDH-mutant. Grade 3.
265	TCGA-S9-A7R7	TCGA-S9-A7R7-01A	mC3	no	astrocytoma	G2	2.1	Astrocytoma, IDH-mutant. Grade 2.
266	TCGA-TM-A84F	TCGA-TM-A84F-01A	mC3	no	astrocytoma	G3	2.2	Astrocytoma, IDH-mutant. Grade 3.
267	TCGA-HT-7684	TCGA-HT-7684-01A	mC3	no	oligoastrocytoma	G3	3.2	Astrocytoma, IDH-mutant. Grade 3.
268	TCGA-HT-A614	TCGA-HT-A614-01A	mC3	no	oligoastrocytoma	G2	3.1	Astrocytoma, IDH-mutant. Grade 2.
269	TCGA-DH-A7UT	TCGA-DH-A7UT-01A	mC3	no	astrocytoma	G3	2.2	Astrocytoma, IDH-mutant. Grade 3.
270	TCGA-S9-A6WI	TCGA-S9-A6WI-01A	mC3	no	oligoastrocytoma	G2	3.1	Astrocytoma, IDH-mutant. Grade 2.
271	TCGA-FG-8189	TCGA-FG-8189-01B	mC3	no	oligodendroglioma	G2	1.6	Astrocytoma, IDH-mutant. Grade 2.
272	TCGA-HT-A61A	TCGA-HT-A61A-01A	mC3	no	oligodendroglioma	G2	1.9	Astrocytoma, IDH-mutant. Grade NA.
273	TCGA-FG-A713	TCGA-FG-A713-01A	mC3	no	oligoastrocytoma	G2	3.8	NA. Grade NA.
274	TCGA-HT-A4DV	TCGA-HT-A4DV-01A	mC3	no	oligodendroglioma	G3	1.2	Oligodendroglioma, IDH-mutant, 1p/19q-codeleted. Grade 3.
275	TCGA-HT-7607	TCGA-HT-7607-01A	mC3	no	astrocytoma	G2	2.4	Oligodendroglioma, IDH-mutant, 1p/19q-codeleted. Grade 2.
276	TCGA-HT-7874	TCGA-HT-7874-01A	mC3	no	oligodendroglioma	G3	1.2	Oligodendroglioma, IDH-mutant, 1p/19q-codeleted. Grade 3.
277	TCGA-HT-8113	TCGA-HT-8113-01A	mC3	no	oligodendroglioma	G2	1.6	Astrocytoma, IDH-mutant. Grade 2.
278	TCGA-HT-A5R5	TCGA-HT-A5R5-01A	mC3	no	oligodendroglioma	G2	1.6	Astrocytoma, IDH-mutant. Grade 2.
279	TCGA-QH-A6CU	TCGA-QH-A6CU-01A	mC3	no	oligodendroglioma	G3	1.2	Oligodendroglioma, IDH-mutant, 1p/19q-codeleted. Grade 3.
280	TCGA-DB-5270	TCGA-DB-5270-01A	mC3	no	oligoastrocytoma	G3	3.2	Astrocytoma, IDH-mutant. Grade 3.
281	TCGA-S9-A7IQ	TCGA-S9-A7IQ-01A	mC3	no	oligoastrocytoma	G2	3.5	Oligodendroglioma, IDH-mutant, 1p/19q-codeleted. Grade 2.
282	TCGA-QH-A6X5	TCGA-QH-A6X5-01A	mC3	no	oligoastrocytoma	G2	3.5	Oligodendroglioma, IDH-mutant, 1p/19q-codeleted. Grade 2.
283	TCGA-HT-8010	TCGA-HT-8010-01A	mC3	no	oligodendroglioma	G2	1.1	Oligodendroglioma, IDH-mutant, 1p/19q-codeleted. Grade 2.
284	TCGA-HT-A618	TCGA-HT-A618-01A	mC3	no	astrocytoma	G3	2.2	Astrocytoma, IDH-mutant. Grade 3.
285	TCGA-HT-7686	TCGA-HT-7686-01A	mC3	no	astrocytoma	G3	2.2	Astrocytoma, IDH-mutant. Grade 3.
286	TCGA-HT-7601	TCGA-HT-7601-01A	mC3	no	astrocytoma	G3	2.2	Astrocytoma, IDH-mutant. Grade 3.
287	TCGA-HT-7902	TCGA-HT-7902-01A	mC3	no	oligoastrocytoma	G2	3.1	Astrocytoma, IDH-mutant. Grade 2.
288	TCGA-HT-A5R7	TCGA-HT-A5R7-01A	mC3	no	astrocytoma	G3	2.2	Astrocytoma, IDH-mutant. Grade 3.
289	TCGA-HT-8018	TCGA-HT-8018-01A	mC3	no	oligoastrocytoma	G2	3.1	Astrocytoma, IDH-mutant. Grade 2.
290	TCGA-P5-A5EX	TCGA-P5-A5EX-01A	mC3	no	oligodendroglioma	G3	1.2	Oligodendroglioma, IDH-mutant, 1p/19q-codeleted. Grade 3.
291	TCGA-S9-A6WN	TCGA-S9-A6WN-01A	mC3	no	astrocytoma	G3	2.5	Oligodendroglioma, IDH-mutant, 1p/19q-codeleted. Grade 3.
292	TCGA-HT-8563	TCGA-HT-8563-01A	mC3	no	astrocytoma	G3	2.2	Astrocytoma, IDH-mutant. Grade 3.
293	TCGA-DU-A7T6	TCGA-DU-A7T6-01A	mC3	no	oligodendroglioma	G3	1.2	Oligodendroglioma, IDH-mutant, 1p/19q-codeleted. Grade 3.
294	TCGA-FG-5965	TCGA-FG-5965-02B	mC3	yes	oligoastrocytoma	G2	3.3	Astrocytoma, IDH-mutant. Grade 4.
295	TCGA-FG-5965	TCGA-FG-5965-02A	mC3	yes	oligoastrocytoma	G2	3.3	Astrocytoma, IDH-mutant. Grade 4.
296	TCGA-FG-A87N	TCGA-FG-A87N-01A	mC3	no	astrocytoma	G3	2.3	Astrocytoma, IDH-mutant. Grade 4.
297	TCGA-HT-7606	TCGA-HT-7606-01A	mC3	no	astrocytoma	G2	2.1	Astrocytoma, IDH-mutant. Grade 2.
298	TCGA-DB-A64X	TCGA-DB-A64X-01A	mC3	no	astrocytoma	G3	2.2	Astrocytoma, IDH-mutant. Grade 3.
299	TCGA-DU-A5TU	TCGA-DU-A5TU-01A	mC3	no	astrocytoma	G2	2.1	Astrocytoma, IDH-mutant. Grade 2.
300	TCGA-DU-6407	TCGA-DU-6407-02A	mC3	yes	oligodendroglioma	G2	1.8	Astrocytoma, IDH-mutant. Grade 4.
301	TCGA-S9-A6TS	TCGA-S9-A6TS-01A	mC3	no	astrocytoma	G3	2.2	Astrocytoma, IDH-mutant. Grade 3.
302	TCGA-S9-A7IZ	TCGA-S9-A7IZ-01A	mC3	no	astrocytoma	G3	2.2	Astrocytoma, IDH-mutant. Grade 3.
303	TCGA-DU-6396	TCGA-DU-6396-01A	mC3	no	oligoastrocytoma	G3	3.2	Astrocytoma, IDH-mutant. Grade 3.
304	TCGA-HW-8319	TCGA-HW-8319-01A	mC3	no	astrocytoma	G3	2.2	Astrocytoma, IDH-mutant. Grade 3.
305	TCGA-FG-A4MT	TCGA-FG-A4MT-01A	mC4	yes	oligodendroglioma	G2	1.6	Astrocytoma, IDH-mutant. Grade 2.
306	TCGA-FG-A4MT	TCGA-FG-A4MT-02A	mC4	yes	oligodendroglioma	G2	1.6	Astrocytoma, IDH-mutant. Grade 2.
307	TCGA-S9-A7QW	TCGA-S9-A7QW-01A	mC4	no	astrocytoma	G3	2.2	Astrocytoma, IDH-mutant. Grade 3.
308	TCGA-DU-5872	TCGA-DU-5872-01A	mC4	yes	oligoastrocytoma	G2	3.1	Astrocytoma, IDH-mutant. Grade 2.
309	TCGA-P5-A731	TCGA-P5-A731-01A	mC4	no	oligoastrocytoma	G2	3.1	Astrocytoma, IDH-mutant. Grade 2.
310	TCGA-FG-A711	TCGA-FG-A711-01A	mC4	no	oligodendroglioma	G2	1.6	Astrocytoma, IDH-mutant. Grade 2.
311	TCGA-QH-A65S	TCGA-QH-A65S-01A	mC4	no	oligoastrocytoma	G2	3.1	Astrocytoma, IDH-mutant. Grade 2.
312	TCGA-HT-7689	TCGA-HT-7689-01A	mC4	no	oligodendroglioma	G2	1.6	Astrocytoma, IDH-mutant. Grade 2.
313	TCGA-P5-A5F2	TCGA-P5-A5F2-01A	mC4	no	astrocytoma	G2	2.1	Astrocytoma, IDH-mutant. Grade 2.
314	TCGA-CS-4942	TCGA-CS-4942-01A	mC4	no	astrocytoma	G3	2.2	Astrocytoma, IDH-mutant. Grade 3.
315	TCGA-DU-6408	TCGA-DU-6408-01A	mC4	no	oligodendroglioma	G3	1.7	Astrocytoma, IDH-mutant. Grade 3.
316	TCGA-HT-A616	TCGA-HT-A616-01A	mC4	no	astrocytoma	G2	2.1	Astrocytoma, IDH-mutant. Grade 2.
317	TCGA-DH-A66G	TCGA-DH-A66G-01A	mC4	no	oligodendroglioma	G3	1.7	Astrocytoma, IDH-mutant. Grade 3.
318	TCGA-FG-5965	TCGA-FG-5965-01B	mC4	yes	oligoastrocytoma	G2	3.3	Astrocytoma, IDH-mutant. Grade 4.
319	TCGA-FG-A60J	TCGA-FG-A60J-01A	mC4	no	oligoastrocytoma	G2	3.1	Astrocytoma, IDH-mutant. Grade 2.
320	TCGA-HT-8013	TCGA-HT-8013-01A	mC4	no	oligoastrocytoma	G2	3.1	Astrocytoma, IDH-mutant. Grade 2.
321	TCGA-TM-A7CF	TCGA-TM-A7CF-02A	mC4	yes	astrocytoma	G2	2.1	Astrocytoma, IDH-mutant. Grade 2.
322	TCGA-TM-A7CF	TCGA-TM-A7CF-01A	mC4	yes	astrocytoma	G2	2.1	Astrocytoma, IDH-mutant. Grade 2.
323	TCGA-DB-A4X9	TCGA-DB-A4X9-01A	mC4	no	oligoastrocytoma	G2	3.1	Astrocytoma, IDH-mutant. Grade 2.
324	TCGA-DB-A4XE	TCGA-DB-A4XE-01A	mC4	no	oligoastrocytoma	G3	3.2	Astrocytoma, IDH-mutant. Grade 3.
325	TCGA-DU-8166	TCGA-DU-8166-01A	mC4	no	oligoastrocytoma	G2	3.1	Astrocytoma, IDH-mutant. Grade 2.
326	TCGA-VM-A8C8	TCGA-VM-A8C8-01A	mC4	no	oligodendroglioma	G2	1.6	Astrocytoma, IDH-mutant. Grade 2.
327	TCGA-TM-A7C4	TCGA-TM-A7C4-01A	mC4	no	astrocytoma	G2	2.1	Astrocytoma, IDH-mutant. Grade 2.
328	TCGA-QH-A6XA	TCGA-QH-A6XA-01A	mC4	no	oligoastrocytoma	G2	3.1	Astrocytoma, IDH-mutant. Grade 2.
329	TCGA-S9-A6WQ	TCGA-S9-A6WQ-01A	mC4	no	oligoastrocytoma	G2	3.1	Astrocytoma, IDH-mutant. Grade 2.
330	TCGA-HW-7493	TCGA-HW-7493-01A	mC4	no	astrocytoma	G2	2.1	Astrocytoma, IDH-mutant. Grade 2.
331	TCGA-HT-7610	TCGA-HT-7610-01A	mC4	no	oligoastrocytoma	G2	3.1	Astrocytoma, IDH-mutant. Grade 2.
332	TCGA-HT-7482	TCGA-HT-7482-01A	mC4	no	oligoastrocytoma	G2	3.1	Astrocytoma, IDH-mutant. Grade 2.
333	TCGA-QH-A870	TCGA-QH-A870-01A	mC4	no	oligoastrocytoma	G3	3.2	Astrocytoma, IDH-mutant. Grade 3.
334	TCGA-S9-A7R3	TCGA-S9-A7R3-01A	mC4	no	astrocytoma	G2	2.1	Astrocytoma, IDH-mutant. Grade 2.
335	TCGA-P5-A5EW	TCGA-P5-A5EW-01A	mC4	no	astrocytoma	G2	2.1	Astrocytoma, IDH-mutant. Grade 2.
336	TCGA-CS-4938	TCGA-CS-4938-01B	mC4	no	astrocytoma	G2	2.1	Astrocytoma, IDH-mutant. Grade 2.
337	TCGA-E1-A7Z6	TCGA-E1-A7Z6-01A	mC4	no	astrocytoma	G2	2.1	Astrocytoma, IDH-mutant. Grade 2.
338	TCGA-E1-5322	TCGA-E1-5322-01A	mC4	no	oligoastrocytoma	G2	3.1	Astrocytoma, IDH-mutant. Grade 2.
339	TCGA-DB-A75L	TCGA-DB-A75L-01A	mC4	no	astrocytoma	G3	2.2	Astrocytoma, IDH-mutant. Grade 3.
340	TCGA-FG-A4MY	TCGA-FG-A4MY-01A	mC4	no	oligoastrocytoma	G2	3.1	Astrocytoma, IDH-mutant. Grade 2.
341	TCGA-FG-A70Y	TCGA-FG-A70Y-01A	mC4	no	oligodendroglioma	G2	1.8	Astrocytoma, IDH-mutant. Grade 4.
342	TCGA-FG-A60L	TCGA-FG-A60L-01A	mC4	no	astrocytoma	G2	2.1	Astrocytoma, IDH-mutant. Grade 2.
343	TCGA-WY-A858	TCGA-WY-A858-01A	mC4	no	astrocytoma	G3	2.2	Astrocytoma, IDH-mutant. Grade 3.
344	TCGA-DU-5871	TCGA-DU-5871-01A	mC4	no	oligoastrocytoma	G2	3.1	Astrocytoma, IDH-mutant. Grade 2.
345	TCGA-DU-7309	TCGA-DU-7309-01A	mC4	no	oligodendroglioma	G3	1.7	Astrocytoma, IDH-mutant. Grade 3.
346	TCGA-P5-A5F4	TCGA-P5-A5F4-01A	mC4	no	oligodendroglioma	G3	1.7	Astrocytoma, IDH-mutant. Grade 3.
347	TCGA-HT-8108	TCGA-HT-8108-01A	mC4	no	oligodendroglioma	G2	1.6	Astrocytoma, IDH-mutant. Grade 2.
348	TCGA-P5-A733	TCGA-P5-A733-01A	mC4	no	astrocytoma	G2	2.1	Astrocytoma, IDH-mutant. Grade 2.
349	TCGA-DU-7008	TCGA-DU-7008-01A	mC4	no	oligodendroglioma	G2	1.6	Astrocytoma, IDH-mutant. Grade 2.
350	TCGA-S9-A7QX	TCGA-S9-A7QX-01A	mC4	no	astrocytoma	G3	2.2	Astrocytoma, IDH-mutant. Grade 3.
351	TCGA-DU-A6S7	TCGA-DU-A6S7-01A	mC4	no	astrocytoma	G3	2.2	Astrocytoma, IDH-mutant. Grade 3.
352	TCGA-DU-A5TW	TCGA-DU-A5TW-01A	mC4	no	astrocytoma	G3	2.2	Astrocytoma, IDH-mutant. Grade 3.
353	TCGA-S9-A7J0	TCGA-S9-A7J0-01A	mC4	no	oligodendroglioma	G3	1.8	Astrocytoma, IDH-mutant. Grade 4.
354	TCGA-HT-7693	TCGA-HT-7693-01A	mC4	no	oligodendroglioma	G2	1.6	Astrocytoma, IDH-mutant. Grade 2.
355	TCGA-QH-A6X9	TCGA-QH-A6X9-01A	mC4	no	oligodendroglioma	G2	1.6	Astrocytoma, IDH-mutant. Grade 2.
356	TCGA-DH-A66D	TCGA-DH-A66D-01A	mC4	no	astrocytoma	G3	2.2	Astrocytoma, IDH-mutant. Grade 3.
357	TCGA-DU-5855	TCGA-DU-5855-01A	mC4	no	oligoastrocytoma	G3	3.2	Astrocytoma, IDH-mutant. Grade 3.
358	TCGA-CS-6667	TCGA-CS-6667-01A	mC4	no	astrocytoma	G2	2.1	Astrocytoma, IDH-mutant. Grade 2.
359	TCGA-DU-7298	TCGA-DU-7298-01A	mC4	no	astrocytoma	G3	2.2	Astrocytoma, IDH-mutant. Grade 3.
360	TCGA-DU-8167	TCGA-DU-8167-01A	mC4	no	oligoastrocytoma	G2	3.1	Astrocytoma, IDH-mutant. Grade 2.
361	TCGA-HT-7884	TCGA-HT-7884-01B	mC4	no	astrocytoma	G2	2.1	Astrocytoma, IDH-mutant. Grade 2.
362	TCGA-S9-A6TZ	TCGA-S9-A6TZ-01A	mC4	no	astrocytoma	G2	2.1	Astrocytoma, IDH-mutant. Grade 2.
363	TCGA-HW-A5KL	TCGA-HW-A5KL-01A	mC4	no	astrocytoma	G2	2.1	Astrocytoma, IDH-mutant. Grade 2.
364	TCGA-DU-6407	TCGA-DU-6407-01A	mC4	yes	oligodendroglioma	G2	1.8	Astrocytoma, IDH-mutant. Grade 4.
365	TCGA-DB-A4XF	TCGA-DB-A4XF-01A	mC4	no	astrocytoma	G3	2.2	Astrocytoma, IDH-mutant. Grade 3.
366	TCGA-TM-A84H	TCGA-TM-A84H-01A	mC4	no	oligoastrocytoma	G3	3.2	Astrocytoma, IDH-mutant. Grade 3.
367	TCGA-VV-A86M	TCGA-VV-A86M-01A	mC4	no	astrocytoma	G3	2.2	Astrocytoma, IDH-mutant. Grade 3.
368	TCGA-S9-A7R8	TCGA-S9-A7R8-01A	mC4	no	astrocytoma	G3	2.2	Astrocytoma, IDH-mutant. Grade 3.
369	TCGA-E1-5307	TCGA-E1-5307-01A	mC4	no	astrocytoma	G3	2.2	Astrocytoma, IDH-mutant. Grade 3.
370	TCGA-DU-5870	TCGA-DU-5870-02A	mC5	yes	oligodendroglioma	G2	1.1	Oligodendroglioma, IDH-mutant, 1p/19q-codeleted. Grade 2.
371	TCGA-DB-A64Q	TCGA-DB-A64Q-01A	mC5	no	oligoastrocytoma	G2	3.5	Oligodendroglioma, IDH-mutant, 1p/19q-codeleted. Grade 2.
372	TCGA-CS-5396	TCGA-CS-5396-01A	mC5	no	oligodendroglioma	G3	1.2	Oligodendroglioma, IDH-mutant, 1p/19q-codeleted. Grade 3.
373	TCGA-DU-A6S8	TCGA-DU-A6S8-01A	mC5	no	oligodendroglioma	G3	1.2	Oligodendroglioma, IDH-mutant, 1p/19q-codeleted. Grade 3.
374	TCGA-P5-A72Z	TCGA-P5-A72Z-01A	mC5	no	oligodendroglioma	G3	1.2	Oligodendroglioma, IDH-mutant, 1p/19q-codeleted. Grade 3.
375	TCGA-CS-6668	TCGA-CS-6668-01A	mC5	no	oligodendroglioma	G2	1.1	Oligodendroglioma, IDH-mutant, 1p/19q-codeleted. Grade 2.
376	TCGA-TM-A84O	TCGA-TM-A84O-01A	mC5	no	oligodendroglioma	G3	1.2	Oligodendroglioma, IDH-mutant, 1p/19q-codeleted. Grade 3.
377	TCGA-FG-A710	TCGA-FG-A710-01A	mC5	no	oligodendroglioma	G2	1.1	Oligodendroglioma, IDH-mutant, 1p/19q-codeleted. Grade 2.
378	TCGA-DU-5870	TCGA-DU-5870-01A	mC5	yes	oligodendroglioma	G2	1.1	Oligodendroglioma, IDH-mutant, 1p/19q-codeleted. Grade 2.
379	TCGA-DU-7300	TCGA-DU-7300-01A	mC5	no	oligodendroglioma	G3	1.2	Oligodendroglioma, IDH-mutant, 1p/19q-codeleted. Grade 3.
380	TCGA-DU-7009	TCGA-DU-7009-01A	mC5	no	oligodendroglioma	G2	1.1	Oligodendroglioma, IDH-mutant, 1p/19q-codeleted. Grade 2.
381	TCGA-FG-A6J1	TCGA-FG-A6J1-01A	mC5	no	oligodendroglioma	G2	1.1	Oligodendroglioma, IDH-mutant, 1p/19q-codeleted. Grade 2.
382	TCGA-S9-A7QY	TCGA-S9-A7QY-01A	mC5	no	oligoastrocytoma	G2	3.5	Oligodendroglioma, IDH-mutant, 1p/19q-codeleted. Grade 2.
383	TCGA-E1-5319	TCGA-E1-5319-01A	mC5	no	oligodendroglioma	G2	1.1	Oligodendroglioma, IDH-mutant, 1p/19q-codeleted. Grade 2.
384	TCGA-FG-7638	TCGA-FG-7638-01B	mC5	no	oligodendroglioma	G3	1.5	NA. Grade NA.
385	TCGA-HW-7495	TCGA-HW-7495-01A	mC5	no	oligodendroglioma	G2	1.1	Oligodendroglioma, IDH-mutant, 1p/19q-codeleted. Grade 2.
386	TCGA-HT-7681	TCGA-HT-7681-01A	mC5	no	oligoastrocytoma	G2	3.5	Oligodendroglioma, IDH-mutant, 1p/19q-codeleted. Grade 2.
387	TCGA-HT-7877	TCGA-HT-7877-01A	mC5	no	oligodendroglioma	G2	1.1	Oligodendroglioma, IDH-mutant, 1p/19q-codeleted. Grade 2.
388	TCGA-S9-A6U2	TCGA-S9-A6U2-01A	mC5	no	oligodendroglioma	G2	1.1	Oligodendroglioma, IDH-mutant, 1p/19q-codeleted. Grade 2.
389	TCGA-DU-A6S2	TCGA-DU-A6S2-01A	mC5	no	oligodendroglioma	G2	1.1	Oligodendroglioma, IDH-mutant, 1p/19q-codeleted. Grade 2.
390	TCGA-FG-A60K	TCGA-FG-A60K-01A	mC5	no	oligoastrocytoma	G2	3.5	Oligodendroglioma, IDH-mutant, 1p/19q-codeleted. Grade 2.
391	TCGA-QH-A65V	TCGA-QH-A65V-01A	mC5	no	oligodendroglioma	G2	1.1	Oligodendroglioma, IDH-mutant, 1p/19q-codeleted. Grade 2.
392	TCGA-DB-A64U	TCGA-DB-A64U-01A	mC5	no	oligoastrocytoma	G2	3.5	Oligodendroglioma, IDH-mutant, 1p/19q-codeleted. Grade 2.
393	TCGA-HT-7695	TCGA-HT-7695-01A	mC5	no	oligodendroglioma	G2	1.1	Oligodendroglioma, IDH-mutant, 1p/19q-codeleted. Grade 2.
394	TCGA-FG-8186	TCGA-FG-8186-01A	mC5	no	oligoastrocytoma	G3	3.6	Oligodendroglioma, IDH-mutant, 1p/19q-codeleted. Grade 3.
395	TCGA-HT-A615	TCGA-HT-A615-01A	mC5	no	oligodendroglioma	G2	1.1	Oligodendroglioma, IDH-mutant, 1p/19q-codeleted. Grade 2.
396	TCGA-HT-A5R9	TCGA-HT-A5R9-01A	mC5	no	oligodendroglioma	G3	1.2	Oligodendroglioma, IDH-mutant, 1p/19q-codeleted. Grade 3.
397	TCGA-QH-A65R	TCGA-QH-A65R-01A	mC5	no	oligodendroglioma	G3	1.2	Oligodendroglioma, IDH-mutant, 1p/19q-codeleted. Grade 3.
398	TCGA-DH-A7UR	TCGA-DH-A7UR-01A	mC5	no	oligodendroglioma	G3	1.2	Oligodendroglioma, IDH-mutant, 1p/19q-codeleted. Grade 3.
399	TCGA-TM-A84G	TCGA-TM-A84G-01A	mC5	no	oligodendroglioma	G3	1.2	Oligodendroglioma, IDH-mutant, 1p/19q-codeleted. Grade 3.
400	TCGA-DU-7018	TCGA-DU-7018-01A	mC5	no	oligodendroglioma	G3	1.2	Oligodendroglioma, IDH-mutant, 1p/19q-codeleted. Grade 3.
401	TCGA-DU-7294	TCGA-DU-7294-01A	mC5	no	oligodendroglioma	G2	1.1	Oligodendroglioma, IDH-mutant, 1p/19q-codeleted. Grade 2.
402	TCGA-DU-7302	TCGA-DU-7302-01A	mC5	no	oligodendroglioma	G3	1.2	Oligodendroglioma, IDH-mutant, 1p/19q-codeleted. Grade 3.
403	TCGA-S9-A7J3	TCGA-S9-A7J3-01A	mC5	no	oligodendroglioma	G3	1.2	Oligodendroglioma, IDH-mutant, 1p/19q-codeleted. Grade 3.
404	TCGA-DB-A64L	TCGA-DB-A64L-01A	mC5	no	oligodendroglioma	G2	1.1	Oligodendroglioma, IDH-mutant, 1p/19q-codeleted. Grade 2.
405	TCGA-R8-A6MO	TCGA-R8-A6MO-01A	mC5	no	oligodendroglioma	G2	1.1	Oligodendroglioma, IDH-mutant, 1p/19q-codeleted. Grade 2.
406	TCGA-DB-A75K	TCGA-DB-A75K-01A	mC5	no	oligoastrocytoma	G3	3.6	Oligodendroglioma, IDH-mutant, 1p/19q-codeleted. Grade 3.
407	TCGA-EZ-7264	TCGA-EZ-7264-01A	mC5	no	oligodendroglioma	G2	1.1	Oligodendroglioma, IDH-mutant, 1p/19q-codeleted. Grade 2.
408	TCGA-HT-7471	TCGA-HT-7471-01A	mC5	no	oligodendroglioma	G3	1.2	Oligodendroglioma, IDH-mutant, 1p/19q-codeleted. Grade 3.
409	TCGA-R8-A73M	TCGA-R8-A73M-01A	mC5	no	oligodendroglioma	G2	1.1	Oligodendroglioma, IDH-mutant, 1p/19q-codeleted. Grade 2.
410	TCGA-HT-8012	TCGA-HT-8012-01A	mC5	no	oligodendroglioma	G2	1.1	Oligodendroglioma, IDH-mutant, 1p/19q-codeleted. Grade 2.
411	TCGA-DB-A64R	TCGA-DB-A64R-01A	mC5	no	oligodendroglioma	G2	1.1	Oligodendroglioma, IDH-mutant, 1p/19q-codeleted. Grade 2.
412	TCGA-QH-A65X	TCGA-QH-A65X-01A	mC5	no	oligoastrocytoma	G3	3.6	Oligodendroglioma, IDH-mutant, 1p/19q-codeleted. Grade 3.
413	TCGA-VW-A7QS	TCGA-VW-A7QS-01A	mC5	no	oligodendroglioma	G3	1.2	Oligodendroglioma, IDH-mutant, 1p/19q-codeleted. Grade 3.
414	TCGA-DU-A6S6	TCGA-DU-A6S6-01A	mC5	no	oligoastrocytoma	G2	3.5	Oligodendroglioma, IDH-mutant, 1p/19q-codeleted. Grade 2.
415	TCGA-DH-A669	TCGA-DH-A669-01A	mC5	yes	oligodendroglioma	G3	1.2	Oligodendroglioma, IDH-mutant, 1p/19q-codeleted. Grade 3.
416	TCGA-DH-A669	TCGA-DH-A669-02A	mC5	yes	oligodendroglioma	G3	1.2	Oligodendroglioma, IDH-mutant, 1p/19q-codeleted. Grade 3.
417	TCGA-QH-A6X8	TCGA-QH-A6X8-01A	mC5	no	oligodendroglioma	G3	1.2	Oligodendroglioma, IDH-mutant, 1p/19q-codeleted. Grade 3.
418	TCGA-DB-A64W	TCGA-DB-A64W-01A	mC5	no	oligoastrocytoma	G3	3.6	Oligodendroglioma, IDH-mutant, 1p/19q-codeleted. Grade 3.
419	TCGA-E1-5318	TCGA-E1-5318-01A	mC5	no	oligodendroglioma	G2	1.1	Oligodendroglioma, IDH-mutant, 1p/19q-codeleted. Grade 2.
420	TCGA-DU-5874	TCGA-DU-5874-01A	mC5	no	oligodendroglioma	G2	1.1	Oligodendroglioma, IDH-mutant, 1p/19q-codeleted. Grade 2.
421	TCGA-DU-8168	TCGA-DU-8168-01A	mC5	no	oligodendroglioma	G3	1.2	Oligodendroglioma, IDH-mutant, 1p/19q-codeleted. Grade 3.
422	TCGA-CS-5390	TCGA-CS-5390-01A	mC5	no	oligodendroglioma	G2	1.1	Oligodendroglioma, IDH-mutant, 1p/19q-codeleted. Grade 2.
423	TCGA-DB-A4XH	TCGA-DB-A4XH-01A	mC5	no	oligoastrocytoma	G2	3.5	Oligodendroglioma, IDH-mutant, 1p/19q-codeleted. Grade 2.
424	TCGA-DB-5274	TCGA-DB-5274-01A	mC5	no	oligoastrocytoma	G3	3.6	Oligodendroglioma, IDH-mutant, 1p/19q-codeleted. Grade 3.
425	TCGA-DH-5144	TCGA-DH-5144-01A	mC5	no	oligodendroglioma	G3	1.5	NA. Grade NA.
426	TCGA-DU-6400	TCGA-DU-6400-01A	mC5	no	oligodendroglioma	G2	1.1	Oligodendroglioma, IDH-mutant, 1p/19q-codeleted. Grade 2.
427	TCGA-S9-A6WH	TCGA-S9-A6WH-01A	mC5	no	oligoastrocytoma	G2	3.5	Oligodendroglioma, IDH-mutant, 1p/19q-codeleted. Grade 2.
428	TCGA-HW-7491	TCGA-HW-7491-01A	mC6	no	oligodendroglioma	G2	1.1	Oligodendroglioma, IDH-mutant, 1p/19q-codeleted. Grade 2.
429	TCGA-DB-A4XG	TCGA-DB-A4XG-01A	mC6	no	oligodendroglioma	G3	1.2	Oligodendroglioma, IDH-mutant, 1p/19q-codeleted. Grade 3.
430	TCGA-S9-A7R1	TCGA-S9-A7R1-01A	mC6	no	oligodendroglioma	G2	1.1	Oligodendroglioma, IDH-mutant, 1p/19q-codeleted. Grade 2.
431	TCGA-P5-A730	TCGA-P5-A730-01A	mC6	no	oligoastrocytoma	G3	3.6	Oligodendroglioma, IDH-mutant, 1p/19q-codeleted. Grade 3.
432	TCGA-TM-A7C5	TCGA-TM-A7C5-01A	mC6	no	oligoastrocytoma	G2	3.5	Oligodendroglioma, IDH-mutant, 1p/19q-codeleted. Grade 2.
433	TCGA-S9-A6WP	TCGA-S9-A6WP-01A	mC6	no	oligoastrocytoma	G3	3.6	Oligodendroglioma, IDH-mutant, 1p/19q-codeleted. Grade 3.
434	TCGA-S9-A6TY	TCGA-S9-A6TY-01A	mC6	no	oligodendroglioma	G2	1.1	Oligodendroglioma, IDH-mutant, 1p/19q-codeleted. Grade 2.
435	TCGA-S9-A6WL	TCGA-S9-A6WL-01A	mC6	no	astrocytoma	G3	2.5	Oligodendroglioma, IDH-mutant, 1p/19q-codeleted. Grade 3.
436	TCGA-F6-A8O3	TCGA-F6-A8O3-01A	mC6	no	oligodendroglioma	G2	1.1	Oligodendroglioma, IDH-mutant, 1p/19q-codeleted. Grade 2.
437	TCGA-S9-A7J2	TCGA-S9-A7J2-01A	mC6	no	oligodendroglioma	G3	1.2	Oligodendroglioma, IDH-mutant, 1p/19q-codeleted. Grade 3.
438	TCGA-HT-7468	TCGA-HT-7468-01A	mC6	no	oligodendroglioma	G3	1.2	Oligodendroglioma, IDH-mutant, 1p/19q-codeleted. Grade 3.
439	TCGA-E1-5311	TCGA-E1-5311-01A	mC6	no	oligodendroglioma	G3	1.2	Oligodendroglioma, IDH-mutant, 1p/19q-codeleted. Grade 3.
440	TCGA-DU-A6S3	TCGA-DU-A6S3-01A	mC6	no	oligodendroglioma	G2	1.1	Oligodendroglioma, IDH-mutant, 1p/19q-codeleted. Grade 2.
441	TCGA-S9-A6WE	TCGA-S9-A6WE-01A	mC6	no	oligodendroglioma	G2	1.1	Oligodendroglioma, IDH-mutant, 1p/19q-codeleted. Grade 2.
442	TCGA-DB-A64P	TCGA-DB-A64P-01A	mC6	no	oligodendroglioma	G3	1.2	Oligodendroglioma, IDH-mutant, 1p/19q-codeleted. Grade 3.
443	TCGA-QH-A86X	TCGA-QH-A86X-01A	mC6	no	oligodendroglioma	G2	1.1	Oligodendroglioma, IDH-mutant, 1p/19q-codeleted. Grade 2.
444	TCGA-DH-5141	TCGA-DH-5141-01A	mC6	no	oligodendroglioma	G3	1.2	Oligodendroglioma, IDH-mutant, 1p/19q-codeleted. Grade 3.
445	TCGA-HT-7480	TCGA-HT-7480-01A	mC6	no	oligodendroglioma	G2	1.1	Oligodendroglioma, IDH-mutant, 1p/19q-codeleted. Grade 2.
446	TCGA-HT-7677	TCGA-HT-7677-01A	mC6	no	oligodendroglioma	G3	1.2	Oligodendroglioma, IDH-mutant, 1p/19q-codeleted. Grade 3.
447	TCGA-DH-A66F	TCGA-DH-A66F-01A	mC6	no	oligodendroglioma	G2	1.1	Oligodendroglioma, IDH-mutant, 1p/19q-codeleted. Grade 2.
448	TCGA-S9-A6UB	TCGA-S9-A6UB-01A	mC6	no	oligodendroglioma	G2	1.1	Oligodendroglioma, IDH-mutant, 1p/19q-codeleted. Grade 2.
449	TCGA-R8-A6ML	TCGA-R8-A6ML-01A	mC6	no	oligodendroglioma	G3	1.2	Oligodendroglioma, IDH-mutant, 1p/19q-codeleted. Grade 3.
450	TCGA-QH-A65Z	TCGA-QH-A65Z-01A	mC6	no	oligodendroglioma	G2	1.1	Oligodendroglioma, IDH-mutant, 1p/19q-codeleted. Grade 2.
451	TCGA-DU-8164	TCGA-DU-8164-01A	mC6	no	oligodendroglioma	G2	1.1	Oligodendroglioma, IDH-mutant, 1p/19q-codeleted. Grade 2.
452	TCGA-DU-6394	TCGA-DU-6394-01A	mC6	no	oligodendroglioma	G3	1.2	Oligodendroglioma, IDH-mutant, 1p/19q-codeleted. Grade 3.
453	TCGA-HT-8105	TCGA-HT-8105-01A	mC6	no	oligodendroglioma	G3	1.2	Oligodendroglioma, IDH-mutant, 1p/19q-codeleted. Grade 3.
454	TCGA-FG-A6IZ	TCGA-FG-A6IZ-01A	mC6	no	oligodendroglioma	G2	1.1	Oligodendroglioma, IDH-mutant, 1p/19q-codeleted. Grade 2.
455	TCGA-CS-5394	TCGA-CS-5394-01A	mC6	no	astrocytoma	G3	2.2	Astrocytoma, IDH-mutant. Grade 3.
456	TCGA-DU-6393	TCGA-DU-6393-01A	mC6	no	oligodendroglioma	G3	1.2	Oligodendroglioma, IDH-mutant, 1p/19q-codeleted. Grade 3.
457	TCGA-DU-6410	TCGA-DU-6410-01A	mC6	no	oligodendroglioma	G3	1.2	Oligodendroglioma, IDH-mutant, 1p/19q-codeleted. Grade 3.
458	TCGA-HT-A619	TCGA-HT-A619-01A	mC6	no	oligodendroglioma	G3	1.2	Oligodendroglioma, IDH-mutant, 1p/19q-codeleted. Grade 3.
459	TCGA-S9-A6TW	TCGA-S9-A6TW-01A	mC6	no	oligodendroglioma	G3	1.2	Oligodendroglioma, IDH-mutant, 1p/19q-codeleted. Grade 3.
460	TCGA-P5-A5F0	TCGA-P5-A5F0-01A	mC6	no	oligodendroglioma	G2	1.1	Oligodendroglioma, IDH-mutant, 1p/19q-codeleted. Grade 2.
461	TCGA-HW-7487	TCGA-HW-7487-01A	mC6	no	oligodendroglioma	G2	1.1	Oligodendroglioma, IDH-mutant, 1p/19q-codeleted. Grade 2.
462	TCGA-HT-8109	TCGA-HT-8109-01A	mC6	no	oligodendroglioma	G3	1.2	Oligodendroglioma, IDH-mutant, 1p/19q-codeleted. Grade 3.
463	TCGA-QH-A6CY	TCGA-QH-A6CY-01A	mC6	no	oligoastrocytoma	G3	3.6	Oligodendroglioma, IDH-mutant, 1p/19q-codeleted. Grade 3.
464	TCGA-W9-A837	TCGA-W9-A837-01A	mC6	no	oligodendroglioma	G2	1.1	Oligodendroglioma, IDH-mutant, 1p/19q-codeleted. Grade 2.
465	TCGA-DU-5849	TCGA-DU-5849-01A	mC6	no	oligodendroglioma	G2	1.1	Oligodendroglioma, IDH-mutant, 1p/19q-codeleted. Grade 2.
466	TCGA-DB-A4XA	TCGA-DB-A4XA-01A	mC6	no	oligoastrocytoma	G2	3.5	Oligodendroglioma, IDH-mutant, 1p/19q-codeleted. Grade 2.
467	TCGA-FG-7641	TCGA-FG-7641-01B	mC6	no	oligodendroglioma	G2	1.1	Oligodendroglioma, IDH-mutant, 1p/19q-codeleted. Grade 2.
468	TCGA-S9-A7J1	TCGA-S9-A7J1-01A	mC6	no	oligodendroglioma	G2	1.1	Oligodendroglioma, IDH-mutant, 1p/19q-codeleted. Grade 2.
469	TCGA-KT-A74X	TCGA-KT-A74X-01A	mC6	no	oligoastrocytoma	G3	3.6	Oligodendroglioma, IDH-mutant, 1p/19q-codeleted. Grade 3.
470	TCGA-CS-6670	TCGA-CS-6670-01A	mC6	no	oligodendroglioma	G3	1.2	Oligodendroglioma, IDH-mutant, 1p/19q-codeleted. Grade 3.
471	TCGA-P5-A5ET	TCGA-P5-A5ET-01A	mC6	no	oligodendroglioma	G2	1.1	Oligodendroglioma, IDH-mutant, 1p/19q-codeleted. Grade 2.
472	TCGA-DU-A76R	TCGA-DU-A76R-01A	mC6	no	oligodendroglioma	G3	1.2	Oligodendroglioma, IDH-mutant, 1p/19q-codeleted. Grade 3.
473	TCGA-S9-A6TX	TCGA-S9-A6TX-01A	mC6	no	oligodendroglioma	G3	1.2	Oligodendroglioma, IDH-mutant, 1p/19q-codeleted. Grade 3.
474	TCGA-E1-A7YO	TCGA-E1-A7YO-01A	mC6	no	oligodendroglioma	G3	1.2	Oligodendroglioma, IDH-mutant, 1p/19q-codeleted. Grade 3.
475	TCGA-FG-7637	TCGA-FG-7637-01A	mC6	no	oligoastrocytoma	G2	3.4	Astrocytoma, IDH-mutant. Grade NA.
476	TCGA-R8-A6MK	TCGA-R8-A6MK-01A	mC6	no	oligodendroglioma	G2	1.1	Oligodendroglioma, IDH-mutant, 1p/19q-codeleted. Grade 2.
477	TCGA-FG-7634	TCGA-FG-7634-01A	mC6	no	oligodendroglioma	G2	1.1	Oligodendroglioma, IDH-mutant, 1p/19q-codeleted. Grade 2.
478	TCGA-HT-7608	TCGA-HT-7608-01A	mC6	no	oligoastrocytoma	G2	3.5	Oligodendroglioma, IDH-mutant, 1p/19q-codeleted. Grade 2.
479	TCGA-S9-A6U5	TCGA-S9-A6U5-01A	mC6	no	astrocytoma	G2	2.4	Oligodendroglioma, IDH-mutant, 1p/19q-codeleted. Grade 2.
480	TCGA-VM-A8CA	TCGA-VM-A8CA-01A	mC6	no	oligodendroglioma	G2	1.6	Astrocytoma, IDH-mutant. Grade 2.
481	TCGA-S9-A7IY	TCGA-S9-A7IY-01A	mC6	no	oligoastrocytoma	G3	3.6	Oligodendroglioma, IDH-mutant, 1p/19q-codeleted. Grade 3.
482	TCGA-DH-A7US	TCGA-DH-A7US-01A	mC6	no	oligodendroglioma	G2	1.1	Oligodendroglioma, IDH-mutant, 1p/19q-codeleted. Grade 2.
483	TCGA-VM-A8CE	TCGA-VM-A8CE-01A	mC6	no	oligodendroglioma	G2	1.1	Oligodendroglioma, IDH-mutant, 1p/19q-codeleted. Grade 2.
484	TCGA-FG-8187	TCGA-FG-8187-01A	mC6	no	oligoastrocytoma	G2	3.5	Oligodendroglioma, IDH-mutant, 1p/19q-codeleted. Grade 2.
485	TCGA-TM-A84S	TCGA-TM-A84S-01A	mC6	no	oligodendroglioma	G3	1.2	Oligodendroglioma, IDH-mutant, 1p/19q-codeleted. Grade 3.
486	TCGA-QH-A6X4	TCGA-QH-A6X4-01A	mC6	no	oligoastrocytoma	G3	3.6	Oligodendroglioma, IDH-mutant, 1p/19q-codeleted. Grade 3.
487	TCGA-HT-7692	TCGA-HT-7692-01A	mC6	no	oligoastrocytoma	G2	3.5	Oligodendroglioma, IDH-mutant, 1p/19q-codeleted. Grade 2.
488	TCGA-HT-7875	TCGA-HT-7875-01A	mC6	no	oligodendroglioma	G2	1.1	Oligodendroglioma, IDH-mutant, 1p/19q-codeleted. Grade 2.
489	TCGA-QH-A6CZ	TCGA-QH-A6CZ-01A	mC6	no	oligoastrocytoma	G2	3.5	Oligodendroglioma, IDH-mutant, 1p/19q-codeleted. Grade 2.
490	TCGA-HW-8322	TCGA-HW-8322-01A	mC6	no	oligodendroglioma	G2	1.1	Oligodendroglioma, IDH-mutant, 1p/19q-codeleted. Grade 2.
491	TCGA-VV-A829	TCGA-VV-A829-01A	mC6	no	oligoastrocytoma	G3	3.6	Oligodendroglioma, IDH-mutant, 1p/19q-codeleted. Grade 3.
492	TCGA-DB-5279	TCGA-DB-5279-01A	mC6	no	oligodendroglioma	G2	1.1	Oligodendroglioma, IDH-mutant, 1p/19q-codeleted. Grade 2.
493	TCGA-VM-A8CB	TCGA-VM-A8CB-01A	mC6	no	oligodendroglioma	G3	1.2	Oligodendroglioma, IDH-mutant, 1p/19q-codeleted. Grade 3.
494	TCGA-TM-A84M	TCGA-TM-A84M-01A	mC6	no	oligodendroglioma	G3	1.2	Oligodendroglioma, IDH-mutant, 1p/19q-codeleted. Grade 3.
495	TCGA-DU-6397	TCGA-DU-6397-02A	mC6	yes	oligodendroglioma	G3	1.2	Oligodendroglioma, IDH-mutant, 1p/19q-codeleted. Grade 3.
496	TCGA-DU-6397	TCGA-DU-6397-01A	mC6	yes	oligodendroglioma	G3	1.2	Oligodendroglioma, IDH-mutant, 1p/19q-codeleted. Grade 3.
497	TCGA-HW-A5KJ	TCGA-HW-A5KJ-01A	mC6	no	oligodendroglioma	G3	1.2	Oligodendroglioma, IDH-mutant, 1p/19q-codeleted. Grade 3.
498	TCGA-S9-A6WD	TCGA-S9-A6WD-01A	mC6	no	oligodendroglioma	G3	1.2	Oligodendroglioma, IDH-mutant, 1p/19q-codeleted. Grade 3.
499	TCGA-HT-7616	TCGA-HT-7616-01A	mC6	no	oligodendroglioma	G3	1.2	Oligodendroglioma, IDH-mutant, 1p/19q-codeleted. Grade 3.
500	TCGA-FG-5962	TCGA-FG-5962-01B	mC6	no	oligodendroglioma	G3	1.2	Oligodendroglioma, IDH-mutant, 1p/19q-codeleted. Grade 3.
501	TCGA-HT-7687	TCGA-HT-7687-01A	mC6	no	oligodendroglioma	G3	1.2	Oligodendroglioma, IDH-mutant, 1p/19q-codeleted. Grade 3.
502	TCGA-IK-8125	TCGA-IK-8125-01A	mC6	no	oligoastrocytoma	G3	3.6	Oligodendroglioma, IDH-mutant, 1p/19q-codeleted. Grade 3.
503	TCGA-S9-A7QZ	TCGA-S9-A7QZ-01A	mC6	no	oligodendroglioma	G2	1.1	Oligodendroglioma, IDH-mutant, 1p/19q-codeleted. Grade 2.
504	TCGA-DU-A5TS	TCGA-DU-A5TS-01A	mC6	no	oligodendroglioma	G2	1.6	Astrocytoma, IDH-mutant. Grade 2.
505	TCGA-DU-7007	TCGA-DU-7007-01A	mC7	no	astrocytoma	G2	2.1	Astrocytoma, IDH-mutant. Grade 2.
506	TCGA-DU-7299	TCGA-DU-7299-01A	mC7	no	astrocytoma	G3	2.2	Astrocytoma, IDH-mutant. Grade 3.
507	TCGA-HW-7490	TCGA-HW-7490-01A	mC7	no	astrocytoma	G2	2.1	Astrocytoma, IDH-mutant. Grade 2.
508	TCGA-CS-5393	TCGA-CS-5393-01A	mC7	no	astrocytoma	G3	2.2	Astrocytoma, IDH-mutant. Grade 3.
509	TCGA-FG-8188	TCGA-FG-8188-01A	mC7	no	oligoastrocytoma	G2	3.1	Astrocytoma, IDH-mutant. Grade 2.
510	TCGA-DU-7019	TCGA-DU-7019-01A	mC7	no	oligoastrocytoma	G3	3.2	Astrocytoma, IDH-mutant. Grade 3.
511	TCGA-P5-A5EZ	TCGA-P5-A5EZ-01A	mC7	no	astrocytoma	G3	2.2	Astrocytoma, IDH-mutant. Grade 3.
512	TCGA-HT-7688	TCGA-HT-7688-01A	mC7	no	oligodendroglioma	G3	1.7	Astrocytoma, IDH-mutant. Grade 3.
513	TCGA-HT-7470	TCGA-HT-7470-01A	mC7	no	oligodendroglioma	G3	1.7	Astrocytoma, IDH-mutant. Grade 3.
514	TCGA-WH-A86K	TCGA-WH-A86K-01A	mC7	no	astrocytoma	G2	2.1	Astrocytoma, IDH-mutant. Grade 2.
515	TCGA-E1-5305	TCGA-E1-5305-01A	mC7	no	astrocytoma	G3	2.2	Astrocytoma, IDH-mutant. Grade 3.
516	TCGA-S9-A6TV	TCGA-S9-A6TV-01A	mC7	no	oligoastrocytoma	G3	3.2	Astrocytoma, IDH-mutant. Grade 3.
517	TCGA-DU-7301	TCGA-DU-7301-01A	mC7	no	oligodendroglioma	G2	1.6	Astrocytoma, IDH-mutant. Grade 2.
518	TCGA-DU-7306	TCGA-DU-7306-01A	mC7	no	oligoastrocytoma	G2	3.1	Astrocytoma, IDH-mutant. Grade 2.
519	TCGA-DH-A66B	TCGA-DH-A66B-01A	mC7	no	astrocytoma	G3	2.2	Astrocytoma, IDH-mutant. Grade 3.
520	TCGA-HT-A74O	TCGA-HT-A74O-01A	mC7	no	astrocytoma	G3	2.2	Astrocytoma, IDH-mutant. Grade 3.
521	TCGA-DU-7304	TCGA-DU-7304-01A	mC7	yes	oligoastrocytoma	G3	3.2	Astrocytoma, IDH-mutant. Grade 3.
522	TCGA-DU-7014	TCGA-DU-7014-01A	mC7	no	oligodendroglioma	G2	1.6	Astrocytoma, IDH-mutant. Grade 2.
523	TCGA-DH-A7UU	TCGA-DH-A7UU-01A	mC7	no	astrocytoma	G3	2.2	Astrocytoma, IDH-mutant. Grade 3.
524	TCGA-S9-A89Z	TCGA-S9-A89Z-01A	mC7	no	astrocytoma	G3	2.3	Astrocytoma, IDH-mutant. Grade 4.
525	TCGA-DU-6399	TCGA-DU-6399-01A	mC7	no	oligodendroglioma	G2	1.6	Astrocytoma, IDH-mutant. Grade 2.
526	TCGA-HT-7477	TCGA-HT-7477-01B	mC7	no	astrocytoma	G3	2.3	Astrocytoma, IDH-mutant. Grade 4.
527	TCGA-P5-A5EU	TCGA-P5-A5EU-01A	mC7	no	astrocytoma	G3	2.3	Astrocytoma, IDH-mutant. Grade 4.
528	TCGA-TM-A84I	TCGA-TM-A84I-01A	mC7	no	astrocytoma	G3	2.2	Astrocytoma, IDH-mutant. Grade 3.
529	TCGA-DB-5277	TCGA-DB-5277-01A	mC7	no	astrocytoma	G3	2.2	Astrocytoma, IDH-mutant. Grade 3.
530	TCGA-CS-6666	TCGA-CS-6666-01A	mC7	no	astrocytoma	G3	2.2	Astrocytoma, IDH-mutant. Grade 3.
531	TCGA-HT-7476	TCGA-HT-7476-01A	mC7	no	astrocytoma	G2	2.3	Astrocytoma, IDH-mutant. Grade 4.
532	TCGA-15-1444	TCGA-15-1444-01A	mC7	no	glioblastoma	G4	4.5	Astrocytoma, IDH-mutant. Grade 4.
533	TCGA-26-1442	TCGA-26-1442-01A	mC7	no	glioblastoma	G4	4.5	Astrocytoma, IDH-mutant. Grade 4.
534	TCGA-E1-5304	TCGA-E1-5304-01A	mC7	no	astrocytoma	G3	2.2	Astrocytoma, IDH-mutant. Grade 3.
535	TCGA-IK-7675	TCGA-IK-7675-01A	mC7	no	oligodendroglioma	G2	1.6	Astrocytoma, IDH-mutant. Grade 2.
536	TCGA-HT-7604	TCGA-HT-7604-01A	mC7	no	astrocytoma	G2	2.1	Astrocytoma, IDH-mutant. Grade 2.
537	TCGA-DH-A7UV	TCGA-DH-A7UV-01A	mC7	no	astrocytoma	G3	2.2	Astrocytoma, IDH-mutant. Grade 3.
538	TCGA-HT-7855	TCGA-HT-7855-01A	mC7	no	astrocytoma	G3	2.2	Astrocytoma, IDH-mutant. Grade 3.
539	TCGA-FG-8185	TCGA-FG-8185-01A	mC7	no	astrocytoma	G3	2.2	Astrocytoma, IDH-mutant. Grade 3.
540	TCGA-QH-A6X3	TCGA-QH-A6X3-01A	mC7	no	oligoastrocytoma	G2	3.1	Astrocytoma, IDH-mutant. Grade 2.
541	TCGA-S9-A6TU	TCGA-S9-A6TU-01A	mC7	no	astrocytoma	G2	2.1	Astrocytoma, IDH-mutant. Grade 2.
542	TCGA-DB-A4XD	TCGA-DB-A4XD-01A	mC7	no	astrocytoma	G3	2.2	Astrocytoma, IDH-mutant. Grade 3.
543	TCGA-HW-8320	TCGA-HW-8320-01A	mC7	no	astrocytoma	G3	2.2	Astrocytoma, IDH-mutant. Grade 3.
544	TCGA-HT-7611	TCGA-HT-7611-01A	mC7	no	oligoastrocytoma	G2	3.1	Astrocytoma, IDH-mutant. Grade 2.
545	TCGA-DU-A7TC	TCGA-DU-A7TC-01A	mC7	no	astrocytoma	G2	2.1	Astrocytoma, IDH-mutant. Grade 2.
546	TCGA-DB-A75M	TCGA-DB-A75M-01A	mC7	no	astrocytoma	G2	2.1	Astrocytoma, IDH-mutant. Grade 2.
547	TCGA-QH-A6CW	TCGA-QH-A6CW-01A	mC7	no	oligoastrocytoma	G3	3.2	Astrocytoma, IDH-mutant. Grade 3.
548	TCGA-S9-A7R4	TCGA-S9-A7R4-01A	mC7	no	astrocytoma	G3	2.2	Astrocytoma, IDH-mutant. Grade 3.
549	TCGA-DB-5280	TCGA-DB-5280-01A	mC7	no	oligoastrocytoma	G2	3.1	Astrocytoma, IDH-mutant. Grade 2.
550	TCGA-DB-5281	TCGA-DB-5281-01A	mC7	no	oligoastrocytoma	G3	3.2	Astrocytoma, IDH-mutant. Grade 3.
551	TCGA-DB-5275	TCGA-DB-5275-01A	mC7	no	oligoastrocytoma	G3	3.2	Astrocytoma, IDH-mutant. Grade 3.
552	TCGA-CS-4943	TCGA-CS-4943-01A	mC7	no	astrocytoma	G3	2.3	Astrocytoma, IDH-mutant. Grade 4.
553	TCGA-DU-6401	TCGA-DU-6401-01A	mC7	no	oligodendroglioma	G2	1.6	Astrocytoma, IDH-mutant. Grade 2.
554	TCGA-FG-6691	TCGA-FG-6691-01A	mC7	no	astrocytoma	G2	2.1	Astrocytoma, IDH-mutant. Grade 2.
555	TCGA-DU-A7TA	TCGA-DU-A7TA-01A	mC7	no	oligodendroglioma	G2	1.6	Astrocytoma, IDH-mutant. Grade 2.
556	TCGA-VM-A8CH	TCGA-VM-A8CH-01A	mC7	no	astrocytoma	G2	2.1	Astrocytoma, IDH-mutant. Grade 2.
557	TCGA-S9-A6U9	TCGA-S9-A6U9-01A	mC7	no	astrocytoma	G3	2.2	Astrocytoma, IDH-mutant. Grade 3.
558	TCGA-DB-A64S	TCGA-DB-A64S-01A	mC7	no	oligoastrocytoma	G2	3.1	Astrocytoma, IDH-mutant. Grade 2.
559	TCGA-S9-A6U1	TCGA-S9-A6U1-01A	mC7	no	astrocytoma	G3	2.2	Astrocytoma, IDH-mutant. Grade 3.
560	TCGA-FG-6690	TCGA-FG-6690-01A	mC7	no	oligodendroglioma	G2	1.6	Astrocytoma, IDH-mutant. Grade 2.
561	TCGA-DU-A5TR	TCGA-DU-A5TR-01A	mC7	no	oligoastrocytoma	G2	3.1	Astrocytoma, IDH-mutant. Grade 2.
562	TCGA-DU-A76O	TCGA-DU-A76O-01A	mC7	no	astrocytoma	G2	2.1	Astrocytoma, IDH-mutant. Grade 2.
563	TCGA-S9-A6U6	TCGA-S9-A6U6-01A	mC7	no	astrocytoma	G3	2.2	Astrocytoma, IDH-mutant. Grade 3.
564	TCGA-S9-A6U8	TCGA-S9-A6U8-01A	mC7	no	astrocytoma	G2	2.1	Astrocytoma, IDH-mutant. Grade 2.
565	TCGA-HT-7858	TCGA-HT-7858-01A	mC7	no	astrocytoma	G2	2.1	Astrocytoma, IDH-mutant. Grade 2.
566	TCGA-HT-A5RB	TCGA-HT-A5RB-01A	mC7	no	astrocytoma	G2	2.1	Astrocytoma, IDH-mutant. Grade 2.
567	TCGA-TM-A7CA	TCGA-TM-A7CA-01A	mC7	no	astrocytoma	G2	2.1	Astrocytoma, IDH-mutant. Grade 2.
568	TCGA-CS-4944	TCGA-CS-4944-01A	mC7	no	astrocytoma	G2	2.1	Astrocytoma, IDH-mutant. Grade 2.
569	TCGA-P5-A5EV	TCGA-P5-A5EV-01A	mC7	no	astrocytoma	G2	2.1	Astrocytoma, IDH-mutant. Grade 2.
570	TCGA-F6-A8O4	TCGA-F6-A8O4-01A	mC7	no	astrocytoma	G2	2.1	Astrocytoma, IDH-mutant. Grade 2.
571	TCGA-HT-7485	TCGA-HT-7485-01A	mC7	no	astrocytoma	G2	2.1	Astrocytoma, IDH-mutant. Grade 2.
572	TCGA-HT-7472	TCGA-HT-7472-01A	mC7	no	oligodendroglioma	G2	1.6	Astrocytoma, IDH-mutant. Grade 2.
573	TCGA-FG-7636	TCGA-FG-7636-01A	mC7	no	astrocytoma	G3	2.2	Astrocytoma, IDH-mutant. Grade 3.
574	TCGA-DH-5143	TCGA-DH-5143-01A	mC7	no	oligoastrocytoma	G3	3.2	Astrocytoma, IDH-mutant. Grade 3.
575	TCGA-DB-5273	TCGA-DB-5273-01A	mC7	no	astrocytoma	G3	2.2	Astrocytoma, IDH-mutant. Grade 3.
576	TCGA-E1-5303	TCGA-E1-5303-01A	mC7	no	astrocytoma	G3	2.2	Astrocytoma, IDH-mutant. Grade 3.
577	TCGA-HW-A5KM	TCGA-HW-A5KM-01A	mC7	no	astrocytoma	G2	2.1	Astrocytoma, IDH-mutant. Grade 2.
578	TCGA-HT-8114	TCGA-HT-8114-01A	mC7	no	oligoastrocytoma	G3	3.2	Astrocytoma, IDH-mutant. Grade 3.
579	TCGA-P5-A5F1	TCGA-P5-A5F1-01A	mC7	no	astrocytoma	G2	2.1	Astrocytoma, IDH-mutant. Grade 2.
580	TCGA-HT-7676	TCGA-HT-7676-01A	mC7	no	oligodendroglioma	G2	1.6	Astrocytoma, IDH-mutant. Grade 2.
581	TCGA-E1-A7YW	TCGA-E1-A7YW-01A	mC7	no	oligoastrocytoma	G2	3.1	Astrocytoma, IDH-mutant. Grade 2.
582	TCGA-S9-A6WO	TCGA-S9-A6WO-01A	mC7	no	astrocytoma	G2	2.1	Astrocytoma, IDH-mutant. Grade 2.
583	TCGA-HT-7879	TCGA-HT-7879-01A	mC7	no	oligoastrocytoma	G3	3.2	Astrocytoma, IDH-mutant. Grade 3.
584	TCGA-P5-A72W	TCGA-P5-A72W-01A	mC7	no	astrocytoma	G3	2.2	Astrocytoma, IDH-mutant. Grade 3.
585	TCGA-FG-A4MX	TCGA-FG-A4MX-01A	mC7	no	astrocytoma	G2	2.1	Astrocytoma, IDH-mutant. Grade 2.
586	TCGA-DU-6395	TCGA-DU-6395-01A	mC7	no	oligoastrocytoma	G2	3.1	Astrocytoma, IDH-mutant. Grade 2.
587	TCGA-DU-A7T8	TCGA-DU-A7T8-01A	mC7	no	oligoastrocytoma	G3	3.2	Astrocytoma, IDH-mutant. Grade 3.
588	TCGA-HT-7690	TCGA-HT-7690-01A	mC7	no	oligoastrocytoma	G3	3.2	Astrocytoma, IDH-mutant. Grade 3.
589	TCGA-HT-7873	TCGA-HT-7873-01B	mC7	no	oligoastrocytoma	G2	3.1	Astrocytoma, IDH-mutant. Grade 2.
590	TCGA-DB-A4XB	TCGA-DB-A4XB-01A	mC7	no	astrocytoma	G3	2.2	Astrocytoma, IDH-mutant. Grade 3.
591	TCGA-HT-7475	TCGA-HT-7475-01A	mC7	no	oligoastrocytoma	G3	3.2	Astrocytoma, IDH-mutant. Grade 3.
592	TCGA-DU-6542	TCGA-DU-6542-01A	mC7	no	oligoastrocytoma	G3	3.2	Astrocytoma, IDH-mutant. Grade 3.
593	TCGA-HW-8321	TCGA-HW-8321-01A	mC7	no	astrocytoma	G3	2.2	Astrocytoma, IDH-mutant. Grade 3.
594	TCGA-DU-A5TP	TCGA-DU-A5TP-01A	mC7	no	astrocytoma	G3	2.2	Astrocytoma, IDH-mutant. Grade 3.
595	TCGA-HT-7609	TCGA-HT-7609-01A	mC7	no	oligoastrocytoma	G3	3.2	Astrocytoma, IDH-mutant. Grade 3.
596	TCGA-TM-A84Q	TCGA-TM-A84Q-01A	mC7	no	astrocytoma	G2	2.1	Astrocytoma, IDH-mutant. Grade 2.
597	TCGA-DH-5142	TCGA-DH-5142-01A	mC7	no	astrocytoma	G3	2.2	Astrocytoma, IDH-mutant. Grade 3.
598	TCGA-TM-A84T	TCGA-TM-A84T-01A	mC7	no	oligoastrocytoma	G2	3.1	Astrocytoma, IDH-mutant. Grade 2.
599	TCGA-HT-A74J	TCGA-HT-A74J-01A	mC7	no	oligoastrocytoma	G2	3.1	Astrocytoma, IDH-mutant. Grade 2.
600	TCGA-FN-7833	TCGA-FN-7833-01A	mC7	no	oligoastrocytoma	G3	3.2	Astrocytoma, IDH-mutant. Grade 3.
601	TCGA-E1-5302	TCGA-E1-5302-01A	mC7	no	astrocytoma	G3	2.2	Astrocytoma, IDH-mutant. Grade 3.
