# Supplementary material for: Reclassification of TCGA Diffuse Glioma Profiles Linked to Transcriptomic, Epigenetic, Genomic and Clinical Data, According to the 2021 WHO CNS Tumor Classification
Source: Int J Mol Sci. 2022 Dec 21;24(1):157. doi: 10.3390/ijms24010157 (PMC9820617; doi:10.3390/ijms24010157)
Supplement: Supplementary file 1 [file ijms-24-00157-s001.zip › ijms-2057006_Table S5.xlsx]

## Sheet: Sheet1
Subtype	Number	Case	Sample_ID	Aliquotes	Age.(years.at.diagnosis)	TCGA_Histology	TCGA_Grade	WHO_CNS5_diagnosis
PN	1	TCGA-FG-5963	TCGA-FG-5963-01A	yes	23	astrocytoma	grade III	Glioblastoma, IDH-wildtype. Grade 4.
PN	2	TCGA-FG-5963	TCGA-FG-5963-02A	yes	23	astrocytoma	grade III	Glioblastoma, IDH-wildtype. Grade 4.
PN	3	TCGA-06-0129	TCGA-06-0129-01A	no	30	glioblastoma	grade IV	Astrocytoma, IDH-mutant. Grade 4.
PN	4	TCGA-06-2570	TCGA-06-2570-01A	no	21	glioblastoma	grade IV	Astrocytoma, IDH-mutant. Grade 4.
PN	5	TCGA-19-1390	TCGA-19-1390-01A	no	63	glioblastoma	grade IV	Glioblastoma, IDH-wildtype. Grade 4.
PN	6	TCGA-DU-6403	TCGA-DU-6403-01A	no	60	oligoastrocytoma	grade III	Glioblastoma, IDH-wildtype. Grade 4.
PN	7	TCGA-06-0221	TCGA-06-0221-02A	no	31	glioblastoma	grade IV	Astrocytoma, IDH-mutant. Grade 4.
PN	8	TCGA-15-1444	TCGA-15-1444-01A	no	21	glioblastoma	grade IV	Astrocytoma, IDH-mutant. Grade 4.
PN	9	TCGA-26-1442	TCGA-26-1442-01A	no	43	glioblastoma	grade IV	Astrocytoma, IDH-mutant. Grade 4.
PN	10	TCGA-19-2629	TCGA-19-2629-01A	no	60	glioblastoma	grade IV	Astrocytoma, IDH-mutant. Grade 4.
PN	11	TCGA-27-2521	TCGA-27-2521-01A	no	34	glioblastoma	grade IV	Astrocytoma, IDH-mutant. Grade 4.
PN	12	TCGA-26-5133	TCGA-26-5133-01A	no	59	glioblastoma	grade IV	Glioblastoma, IDH-wildtype. Grade 4.
PN	13	TCGA-76-4929	TCGA-76-4929-01A	no	76	glioblastoma	grade IV	Glioblastoma, IDH-wildtype. Grade 4.
PN	14	TCGA-27-1834	TCGA-27-1834-01A	no	56	glioblastoma	grade IV	Glioblastoma, IDH-wildtype. Grade 4.
PN	15	TCGA-16-0846	TCGA-16-0846-01A	no	85	glioblastoma	grade IV	Glioblastoma, IDH-wildtype. Grade 4.
PN	16	TCGA-06-0749	TCGA-06-0749-01A	no	50	glioblastoma	grade IV	Glioblastoma, IDH-wildtype. Grade 4.
PN	17	TCGA-HT-A4DS	TCGA-HT-A4DS-01A	no	55	astrocytoma	grade III	Glioblastoma, IDH-wildtype. Grade 4.
PN	18	TCGA-06-2559	TCGA-06-2559-01A	no	83	glioblastoma	grade IV	Glioblastoma, IDH-wildtype. Grade 4.
PN	19	TCGA-32-2634	TCGA-32-2634-01A	no	82	glioblastoma	grade IV	Glioblastoma, IDH-wildtype. Grade 4.
PN	20	TCGA-12-0618	TCGA-12-0618-01A	no	49	glioblastoma	grade IV	Glioblastoma, IDH-wildtype. Grade 4.
PN	21	TCGA-41-5651	TCGA-41-5651-01A	no	59	glioblastoma	grade IV	Glioblastoma, IDH-wildtype. Grade 4.
PN	22	TCGA-06-0174	TCGA-06-0174-01A	no	54	glioblastoma	grade IV	Glioblastoma, IDH-wildtype. Grade 4.
PN	23	TCGA-12-1597	TCGA-12-1597-01B	no	62	glioblastoma	grade IV	Glioblastoma, IDH-wildtype. Grade 4.
PN	24	TCGA-41-2571	TCGA-41-2571-01A	no	89	glioblastoma	grade IV	Glioblastoma, IDH-wildtype. Grade 4.
PN	25	TCGA-HT-A61C	TCGA-HT-A61C-01A	no	66	oligodendroglioma	grade III	Glioblastoma, IDH-wildtype. Grade 4.
PN	26	TCGA-26-5135	TCGA-26-5135-01A	no	72	glioblastoma	grade IV	Glioblastoma, IDH-wildtype. Grade 4.
PN	27	TCGA-19-2624	TCGA-19-2624-01A	no	51	glioblastoma	grade IV	Glioblastoma, IDH-wildtype. Grade 4.
PN	28	TCGA-12-3650	TCGA-12-3650-01A	no	46	glioblastoma	grade IV	Glioblastoma, IDH-wildtype. Grade 4.
PN	29	TCGA-FG-A4MW	TCGA-FG-A4MW-01A	no	63	oligoastrocytoma	grade III	Glioblastoma, IDH-wildtype. Grade 4.
PN	30	TCGA-27-1837	TCGA-27-1837-01A	no	36	glioblastoma	grade IV	Glioblastoma, IDH-wildtype. Grade 4.
PN	31	TCGA-06-0156	TCGA-06-0156-01A_tech_rep_1	yes	57	glioblastoma	grade IV	NA. Grade NA.
PN	32	TCGA-06-0156	TCGA-06-0156-01A_tech_rep_2	yes	57	glioblastoma	grade IV	NA. Grade NA.
PN	33	TCGA-06-0646	TCGA-06-0646-01A	no	60	glioblastoma	grade IV	Glioblastoma, IDH-wildtype. Grade 4.
PN	34	TCGA-06-0138	TCGA-06-0138-01A	no	43	glioblastoma	grade IV	Glioblastoma, IDH-wildtype. Grade 4.
PN	35	TCGA-06-0219	TCGA-06-0219-01A	no	67	glioblastoma	grade IV	Glioblastoma, IDH-wildtype. Grade 4.
PN	36	TCGA-06-5411	TCGA-06-5411-01A	no	51	glioblastoma	grade IV	Glioblastoma, IDH-wildtype. Grade 4.
PN	37	TCGA-06-2558	TCGA-06-2558-01A	no	75	glioblastoma	grade IV	Glioblastoma, IDH-wildtype. Grade 4.
PN	38	TCGA-02-2483	TCGA-02-2483-01A	no	43	glioblastoma	grade IV	Astrocytoma, IDH-mutant. Grade 4.
PN	39	TCGA-06-0238	TCGA-06-0238-01A	no	46	glioblastoma	grade IV	Glioblastoma, IDH-wildtype. Grade 4.
PN	40	TCGA-06-0178	TCGA-06-0178-01A	no	38	glioblastoma	grade IV	Astrocytoma, IDH-mutant. Grade 4.
PN	41	TCGA-12-0616	TCGA-12-0616-01A	no	36	glioblastoma	grade IV	Glioblastoma, IDH-wildtype. Grade 4.
PN	42	TCGA-19-0957	TCGA-19-0957-02A	no	48	glioblastoma	grade IV	Glioblastoma, IDH-wildtype. Grade 4.
PN	43	TCGA-02-0047	TCGA-02-0047-01A	no	78	glioblastoma	grade IV	Glioblastoma, IDH-wildtype. Grade 4.
PN	44	TCGA-28-5215	TCGA-28-5215-01A	no	62	glioblastoma	grade IV	Glioblastoma, IDH-wildtype. Grade 4.
PN	45	TCGA-28-5216	TCGA-28-5216-01A	no	52	glioblastoma	grade IV	Glioblastoma, IDH-wildtype. Grade 4.
PN	46	TCGA-06-5416	TCGA-06-5416-01A	no	23	glioblastoma	grade IV	Glioblastoma, IDH-wildtype. Grade 4.
PN	47	TCGA-06-0686	TCGA-06-0686-01A	no	53	glioblastoma	grade IV	Glioblastoma, IDH-wildtype. Grade 4.
PN	48	TCGA-14-1825	TCGA-14-1825-01A	no	70	glioblastoma	grade IV	Glioblastoma, IDH-wildtype. Grade 4.
PN	49	TCGA-26-5134	TCGA-26-5134-01A	no	74	glioblastoma	grade IV	Glioblastoma, IDH-wildtype. Grade 4.
PN	50	TCGA-06-5417	TCGA-06-5417-01A	no	45	glioblastoma	grade IV	NA. Grade NA.
PN	51	TCGA-28-1753	TCGA-28-1753-01A	no	53	glioblastoma	grade IV	Glioblastoma, IDH-wildtype. Grade 4.
PN	52	TCGA-32-4213	TCGA-32-4213-01A	no	47	glioblastoma	grade IV	Glioblastoma, IDH-wildtype. Grade 4.
PN	53	TCGA-26-5136	TCGA-26-5136-01B	no	78	glioblastoma	grade IV	Glioblastoma, IDH-wildtype. Grade 4.
PN	54	TCGA-32-1982	TCGA-32-1982-01A	no	76	glioblastoma	grade IV	Glioblastoma, IDH-wildtype. Grade 4.
PN	55	TCGA-06-0168	TCGA-06-0168-01A	no	59	glioblastoma	grade IV	Glioblastoma, IDH-wildtype. Grade 4.
PN	56	TCGA-06-2569	TCGA-06-2569-01A	no	24	glioblastoma	grade IV	Glioblastoma, IDH-wildtype. Grade 4.
PN	57	TCGA-14-0871	TCGA-14-0871-01A	no	74	glioblastoma	grade IV	Glioblastoma, IDH-wildtype. Grade 4.
MES	58	TCGA-DU-A76L	TCGA-DU-A76L-01A	no	54	oligodendroglioma	grade III	Glioblastoma, IDH-wildtype. Grade 4.
MES	59	TCGA-76-4927	TCGA-76-4927-01A	no	58	glioblastoma	grade IV	Glioblastoma, IDH-wildtype. Grade 4.
MES	60	TCGA-27-1830	TCGA-27-1830-01A	no	57	glioblastoma	grade IV	Glioblastoma, IDH-wildtype. Grade 4.
MES	61	TCGA-41-3915	TCGA-41-3915-01A	no	48	glioblastoma	grade IV	Glioblastoma, IDH-wildtype. Grade 4.
MES	62	TCGA-06-0649	TCGA-06-0649-01B	no	73	glioblastoma	grade IV	Glioblastoma, IDH-wildtype. Grade 4.
MES	63	TCGA-06-0745	TCGA-06-0745-01A	no	59	glioblastoma	grade IV	Glioblastoma, IDH-wildtype. Grade 4.
MES	64	TCGA-27-2519	TCGA-27-2519-01A	no	48	glioblastoma	grade IV	Glioblastoma, IDH-wildtype. Grade 4.
MES	65	TCGA-32-1980	TCGA-32-1980-01A	no	72	glioblastoma	grade IV	Glioblastoma, IDH-wildtype. Grade 4.
MES	66	TCGA-06-0132	TCGA-06-0132-01A	no	49	glioblastoma	grade IV	Glioblastoma, IDH-wildtype. Grade 4.
MES	67	TCGA-06-5413	TCGA-06-5413-01A	no	67	glioblastoma	grade IV	Glioblastoma, IDH-wildtype. Grade 4.
MES	68	TCGA-14-0817	TCGA-14-0817-01A	no	69	glioblastoma	grade IV	Glioblastoma, IDH-wildtype. Grade 4.
MES	69	TCGA-14-1829	TCGA-14-1829-01A	no	57	glioblastoma	grade IV	Glioblastoma, IDH-wildtype. Grade 4.
MES	70	TCGA-14-0736	TCGA-14-0736-02A	no	49	glioblastoma	grade IV	Glioblastoma, IDH-wildtype. Grade 4.
MES	71	TCGA-76-4928	TCGA-76-4928-01B	no	85	glioblastoma	grade IV	Glioblastoma, IDH-wildtype. Grade 4.
MES	72	TCGA-19-4065	TCGA-19-4065-01A	yes	36	glioblastoma	grade IV	Glioblastoma, IDH-wildtype. Grade 4.
MES	73	TCGA-HT-7882	TCGA-HT-7882-01A	no	66	oligodendroglioma	grade III	Glioblastoma, IDH-wildtype. Grade 4.
MES	74	TCGA-02-0055	TCGA-02-0055-01A	no	62	glioblastoma	grade IV	Glioblastoma, IDH-wildtype. Grade 4.
MES	75	TCGA-19-1389	TCGA-19-1389-02A	no	51	glioblastoma	grade IV	Glioblastoma, IDH-wildtype. Grade 4.
MES	76	TCGA-06-0190	TCGA-06-0190-01A	yes	62	glioblastoma	grade IV	Glioblastoma, IDH-wildtype. Grade 4.
MES	77	TCGA-06-0190	TCGA-06-0190-02A	yes	62	glioblastoma	grade IV	Glioblastoma, IDH-wildtype. Grade 4.
MES	78	TCGA-06-0644	TCGA-06-0644-01A	no	71	glioblastoma	grade IV	Glioblastoma, IDH-wildtype. Grade 4.
MES	79	TCGA-06-0130	TCGA-06-0130-01A	no	54	glioblastoma	grade IV	Glioblastoma, IDH-wildtype. Grade 4.
MES	80	TCGA-28-5218	TCGA-28-5218-01A	no	63	glioblastoma	grade IV	Glioblastoma, IDH-wildtype. Grade 4.
MES	81	TCGA-12-0619	TCGA-12-0619-01A	no	60	glioblastoma	grade IV	Glioblastoma, IDH-wildtype. Grade 4.
MES	82	TCGA-19-4065	TCGA-19-4065-02A	yes	36	glioblastoma	grade IV	Glioblastoma, IDH-wildtype. Grade 4.
MES	83	TCGA-06-0210	TCGA-06-0210-02A	yes	72	glioblastoma	grade IV	Glioblastoma, IDH-wildtype. Grade 4.
MES	84	TCGA-06-0645	TCGA-06-0645-01A	no	55	glioblastoma	grade IV	Glioblastoma, IDH-wildtype. Grade 4.
MES	85	TCGA-06-0211	TCGA-06-0211-02A	yes	47	glioblastoma	grade IV	Glioblastoma, IDH-wildtype. Grade 4.
MES	86	TCGA-27-2524	TCGA-27-2524-01A	no	56	glioblastoma	grade IV	Glioblastoma, IDH-wildtype. Grade 4.
MES	87	TCGA-06-0171	TCGA-06-0171-02A	no	65	glioblastoma	grade IV	Glioblastoma, IDH-wildtype. Grade 4.
MES	88	TCGA-06-5410	TCGA-06-5410-01A	no	72	glioblastoma	grade IV	Glioblastoma, IDH-wildtype. Grade 4.
MES	89	TCGA-06-5412	TCGA-06-5412-01A	no	78	glioblastoma	grade IV	Glioblastoma, IDH-wildtype. Grade 4.
MES	90	TCGA-14-0781	TCGA-14-0781-01B	no	49	glioblastoma	grade IV	Glioblastoma, IDH-wildtype. Grade 4.
MES	91	TCGA-28-2513	TCGA-28-2513-01A	no	69	glioblastoma	grade IV	Glioblastoma, IDH-wildtype. Grade 4.
MES	92	TCGA-14-0789	TCGA-14-0789-01A	no	54	glioblastoma	grade IV	Glioblastoma, IDH-wildtype. Grade 4.
MES	93	TCGA-16-1045	TCGA-16-1045-01B	no	49	glioblastoma	grade IV	Glioblastoma, IDH-wildtype. Grade 4.
MES	94	TCGA-06-0184	TCGA-06-0184-01A	no	63	glioblastoma	grade IV	Glioblastoma, IDH-wildtype. Grade 4.
MES	95	TCGA-41-4097	TCGA-41-4097-01A	no	63	glioblastoma	grade IV	Glioblastoma, IDH-wildtype. Grade 4.
MES	96	TCGA-27-1832	TCGA-27-1832-01A	no	59	glioblastoma	grade IV	Glioblastoma, IDH-wildtype. Grade 4.
MES	97	TCGA-06-0750	TCGA-06-0750-01A	no	43	glioblastoma	grade IV	Glioblastoma, IDH-wildtype. Grade 4.
MES	98	TCGA-06-0141	TCGA-06-0141-01A	no	62	glioblastoma	grade IV	Glioblastoma, IDH-wildtype. Grade 4.
MES	99	TCGA-28-5213	TCGA-28-5213-01A	no	72	glioblastoma	grade IV	Glioblastoma, IDH-wildtype. Grade 4.
MES	100	TCGA-06-0139	TCGA-06-0139-01A	no	40	glioblastoma	grade IV	Glioblastoma, IDH-wildtype. Grade 4.
MES	101	TCGA-06-5858	TCGA-06-5858-01A	no	45	glioblastoma	grade IV	Glioblastoma, IDH-wildtype. Grade 4.
MES	102	TCGA-19-1787	TCGA-19-1787-01B	no	48	glioblastoma	grade IV	Glioblastoma, IDH-wildtype. Grade 4.
MES	103	TCGA-26-5132	TCGA-26-5132-01A	no	74	glioblastoma	grade IV	Glioblastoma, IDH-wildtype. Grade 4.
MES	104	TCGA-19-2625	TCGA-19-2625-01A	no	76	glioblastoma	grade IV	Glioblastoma, IDH-wildtype. Grade 4.
MES	105	TCGA-06-0125	TCGA-06-0125-02A	yes	63	glioblastoma	grade IV	Glioblastoma, IDH-wildtype. Grade 4.
MES	106	TCGA-12-5299	TCGA-12-5299-01A	no	56	glioblastoma	grade IV	Glioblastoma, IDH-wildtype. Grade 4.
MES	107	TCGA-26-5139	TCGA-26-5139-01A	no	65	glioblastoma	grade IV	Glioblastoma, IDH-wildtype. Grade 4.
MES	108	TCGA-06-0187	TCGA-06-0187-01A	no	69	glioblastoma	grade IV	Glioblastoma, IDH-wildtype. Grade 4.
MES	109	TCGA-32-2615	TCGA-32-2615-01A	no	62	glioblastoma	grade IV	Glioblastoma, IDH-wildtype. Grade 4.
MES	110	TCGA-06-0211	TCGA-06-0211-01A	yes	47	glioblastoma	grade IV	Glioblastoma, IDH-wildtype. Grade 4.
MES	111	TCGA-28-2509	TCGA-28-2509-01A	no	77	glioblastoma	grade IV	Glioblastoma, IDH-wildtype. Grade 4.
MES	112	TCGA-14-1034	TCGA-14-1034-01A	yes	60	glioblastoma	grade IV	Glioblastoma, IDH-wildtype. Grade 4.
MES	113	TCGA-06-0210	TCGA-06-0210-01A	yes	72	glioblastoma	grade IV	Glioblastoma, IDH-wildtype. Grade 4.
MES	114	TCGA-06-5418	TCGA-06-5418-01A	no	75	glioblastoma	grade IV	Glioblastoma, IDH-wildtype. Grade 4.
MES	115	TCGA-06-2562	TCGA-06-2562-01A	no	81	glioblastoma	grade IV	Glioblastoma, IDH-wildtype. Grade 4.
MES	116	TCGA-06-0878	TCGA-06-0878-01A	no	74	glioblastoma	grade IV	Glioblastoma, IDH-wildtype. Grade 4.
MES	117	TCGA-14-0787	TCGA-14-0787-01A	no	69	glioblastoma	grade IV	Glioblastoma, IDH-wildtype. Grade 4.
MES	118	TCGA-14-2554	TCGA-14-2554-01A	no	52	glioblastoma	grade IV	Glioblastoma, IDH-wildtype. Grade 4.
MES	119	TCGA-02-2486	TCGA-02-2486-01A	no	64	glioblastoma	grade IV	Glioblastoma, IDH-wildtype. Grade 4.
MES	120	TCGA-14-1823	TCGA-14-1823-01A	no	58	glioblastoma	grade IV	Glioblastoma, IDH-wildtype. Grade 4.
MES	121	TCGA-14-1402	TCGA-14-1402-02A	no	58	glioblastoma	grade IV	Glioblastoma, IDH-wildtype. Grade 4.
MES	122	TCGA-27-1831	TCGA-27-1831-01A	no	66	glioblastoma	grade IV	Glioblastoma, IDH-wildtype. Grade 4.
MES	123	TCGA-12-5295	TCGA-12-5295-01A	no	60	glioblastoma	grade IV	Glioblastoma, IDH-wildtype. Grade 4.
CL	124	TCGA-DU-7012	TCGA-DU-7012-01A	no	74	astrocytoma	grade III	Glioblastoma, IDH-wildtype. Grade 4.
CL	125	TCGA-DU-5847	TCGA-DU-5847-01A	no	34	astrocytoma	grade III	Glioblastoma, IDH-wildtype. Grade 4.
CL	126	TCGA-DU-7290	TCGA-DU-7290-01A	no	45	astrocytoma	grade III	Glioblastoma, IDH-wildtype. Grade 4.
CL	127	TCGA-06-2567	TCGA-06-2567-01A	no	65	glioblastoma	grade IV	Glioblastoma, IDH-wildtype. Grade 4.
CL	128	TCGA-DU-8165	TCGA-DU-8165-01A	no	60	oligodendroglioma	grade III	Glioblastoma, IDH-wildtype. Grade 4.
CL	129	TCGA-DU-8161	TCGA-DU-8161-01A	no	63	oligoastrocytoma	grade III	Glioblastoma, IDH-wildtype. Grade 4.
CL	130	TCGA-HT-7860	TCGA-HT-7860-01A	no	60	astrocytoma	grade III	Glioblastoma, IDH-wildtype. Grade 4.
CL	131	TCGA-CS-4941	TCGA-CS-4941-01A	no	67	astrocytoma	grade III	Glioblastoma, IDH-wildtype. Grade 4.
CL	132	TCGA-HT-8110	TCGA-HT-8110-01A	no	57	astrocytoma	grade III	Glioblastoma, IDH-wildtype. Grade 4.
CL	133	TCGA-HT-A617	TCGA-HT-A617-01A	no	47	oligodendroglioma	grade II	Glioblastoma, IDH-wildtype. Grade 4.
CL	134	TCGA-P5-A72U	TCGA-P5-A72U-01A	no	71	oligodendroglioma	grade III	Glioblastoma, IDH-wildtype. Grade 4.
CL	135	TCGA-DU-7006	TCGA-DU-7006-01A	no	60	astrocytoma	grade III	Glioblastoma, IDH-wildtype. Grade 4.
CL	136	TCGA-DU-6402	TCGA-DU-6402-01A	no	52	astrocytoma	grade III	Glioblastoma, IDH-wildtype. Grade 4.
CL	137	TCGA-06-0882	TCGA-06-0882-01A	no	30	glioblastoma	grade IV	Glioblastoma, IDH-wildtype. Grade 4.
CL	138	TCGA-06-2561	TCGA-06-2561-01A	no	53	glioblastoma	grade IV	Glioblastoma, IDH-wildtype. Grade 4.
CL	139	TCGA-S9-A6U0	TCGA-S9-A6U0-01A	no	46	astrocytoma	grade III	Glioblastoma, IDH-wildtype. Grade 4.
CL	140	TCGA-19-2620	TCGA-19-2620-01A	no	70	glioblastoma	grade IV	Glioblastoma, IDH-wildtype. Grade 4.
CL	141	TCGA-DU-8158	TCGA-DU-8158-01A	no	57	astrocytoma	grade III	Glioblastoma, IDH-wildtype. Grade 4.
CL	142	TCGA-FG-6688	TCGA-FG-6688-01A	no	59	astrocytoma	grade III	Glioblastoma, IDH-wildtype. Grade 4.
CL	143	TCGA-S9-A7R2	TCGA-S9-A7R2-01A	no	69	astrocytoma	grade III	Glioblastoma, IDH-wildtype. Grade 4.
CL	144	TCGA-HT-A74H	TCGA-HT-A74H-01A	no	62	astrocytoma	grade III	Glioblastoma, IDH-wildtype. Grade 4.
CL	145	TCGA-DU-A5TT	TCGA-DU-A5TT-01A	no	70	oligodendroglioma	grade III	Glioblastoma, IDH-wildtype. Grade 4.
CL	146	TCGA-DB-A64O	TCGA-DB-A64O-01A	no	59	oligoastrocytoma	grade II	Glioblastoma, IDH-wildtype. Grade 4.
CL	147	TCGA-HW-A5KK	TCGA-HW-A5KK-01A	no	64	astrocytoma	grade III	Glioblastoma, IDH-wildtype. Grade 4.
CL	148	TCGA-HT-7854	TCGA-HT-7854-01A	no	62	astrocytoma	grade II	Glioblastoma, IDH-wildtype. Grade 4.
CL	149	TCGA-DU-5854	TCGA-DU-5854-01A	no	57	astrocytoma	grade III	Glioblastoma, IDH-wildtype. Grade 4.
CL	150	TCGA-FG-A87Q	TCGA-FG-A87Q-01A	no	61	astrocytoma	grade III	Glioblastoma, IDH-wildtype. Grade 4.
CL	151	TCGA-QH-A6CX	TCGA-QH-A6CX-01A	no	66	astrocytoma	grade II	Glioblastoma, IDH-wildtype. Grade 4.
CL	152	TCGA-QH-A6CS	TCGA-QH-A6CS-01A	no	41	astrocytoma	grade III	Glioblastoma, IDH-wildtype. Grade 4.
CL	153	TCGA-FG-A70Z	TCGA-FG-A70Z-01A	no	53	oligoastrocytoma	grade III	Glioblastoma, IDH-wildtype. Grade 4.
CL	154	TCGA-28-5207	TCGA-28-5207-01A	no	71	glioblastoma	grade IV	Glioblastoma, IDH-wildtype. Grade 4.
CL	155	TCGA-S9-A7IX	TCGA-S9-A7IX-01A	no	57	astrocytoma	grade III	Glioblastoma, IDH-wildtype. Grade 4.
CL	156	TCGA-CS-5397	TCGA-CS-5397-01A	no	54	astrocytoma	grade III	Glioblastoma, IDH-wildtype. Grade 4.
CL	157	TCGA-DU-7292	TCGA-DU-7292-01A	no	69	astrocytoma	grade III	Glioblastoma, IDH-wildtype. Grade 4.
CL	158	TCGA-DU-8162	TCGA-DU-8162-01A	no	61	oligoastrocytoma	grade III	Glioblastoma, IDH-wildtype. Grade 4.
CL	159	TCGA-FG-7643	TCGA-FG-7643-01A	no	49	oligoastrocytoma	grade II	Glioblastoma, IDH-wildtype. Grade 4.
CL	160	TCGA-TM-A84B	TCGA-TM-A84B-01A	no	40	astrocytoma	grade III	Glioblastoma, IDH-wildtype. Grade 4.
CL	161	TCGA-HT-8104	TCGA-HT-8104-01A	no	51	astrocytoma	grade III	Glioblastoma, IDH-wildtype. Grade 4.
CL	162	TCGA-CS-5395	TCGA-CS-5395-01A	no	43	oligodendroglioma	grade II	Glioblastoma, IDH-wildtype. Grade 4.
CL	163	TCGA-DU-A76K	TCGA-DU-A76K-01A	no	87	oligodendroglioma	grade II	Glioblastoma, IDH-wildtype. Grade 4.
CL	164	TCGA-QH-A6XC	TCGA-QH-A6XC-01A	no	48	astrocytoma	grade III	Glioblastoma, IDH-wildtype. Grade 4.
CL	165	TCGA-32-1970	TCGA-32-1970-01A	no	59	glioblastoma	grade IV	Glioblastoma, IDH-wildtype. Grade 4.
CL	166	TCGA-DU-7013	TCGA-DU-7013-01A	no	59	astrocytoma	grade III	Glioblastoma, IDH-wildtype. Grade 4.
CL	167	TCGA-DU-5852	TCGA-DU-5852-01A	no	61	oligoastrocytoma	grade III	Glioblastoma, IDH-wildtype. Grade 4.
CL	168	TCGA-28-2514	TCGA-28-2514-01A	no	45	glioblastoma	grade IV	Glioblastoma, IDH-wildtype. Grade 4.
CL	169	TCGA-DU-A7TD	TCGA-DU-A7TD-01A	no	52	oligoastrocytoma	grade III	Glioblastoma, IDH-wildtype. Grade 4.
CL	170	TCGA-06-0157	TCGA-06-0157-01A	no	63	glioblastoma	grade IV	Glioblastoma, IDH-wildtype. Grade 4.
CL	171	TCGA-02-2485	TCGA-02-2485-01A	no	53	glioblastoma	grade IV	Glioblastoma, IDH-wildtype. Grade 4.
CL	172	TCGA-HT-8011	TCGA-HT-8011-01A	no	55	astrocytoma	grade III	Glioblastoma, IDH-wildtype. Grade 4.
CL	173	TCGA-19-5960	TCGA-19-5960-01A_tech_rep_1	yes	56	glioblastoma	grade IV	Glioblastoma, IDH-wildtype. Grade 4.
CL	174	TCGA-19-5960	TCGA-19-5960-01A_tech_rep_3	yes	56	glioblastoma	grade IV	Glioblastoma, IDH-wildtype. Grade 4.
CL	175	TCGA-06-1804	TCGA-06-1804-01A	no	81	glioblastoma	grade IV	Glioblastoma, IDH-wildtype. Grade 4.
CL	176	TCGA-08-0386	TCGA-08-0386-01A	no	74	glioblastoma	grade IV	Glioblastoma, IDH-wildtype. Grade 4.
CL	177	TCGA-06-5856	TCGA-06-5856-01A	no	58	glioblastoma	grade IV	Glioblastoma, IDH-wildtype. Grade 4.
CL	178	TCGA-06-5408	TCGA-06-5408-01A	no	54	glioblastoma	grade IV	Glioblastoma, IDH-wildtype. Grade 4.
CL	179	TCGA-12-0821	TCGA-12-0821-01A	no	62	glioblastoma	grade IV	Glioblastoma, IDH-wildtype. Grade 4.
CL	180	TCGA-28-5208	TCGA-28-5208-01A	no	52	glioblastoma	grade IV	Glioblastoma, IDH-wildtype. Grade 4.
CL	181	TCGA-32-5222	TCGA-32-5222-01A	no	66	glioblastoma	grade IV	Glioblastoma, IDH-wildtype. Grade 4.
CL	182	TCGA-06-2557	TCGA-06-2557-01A	no	76	glioblastoma	grade IV	Glioblastoma, IDH-wildtype. Grade 4.
CL	183	TCGA-DU-A5TY	TCGA-DU-A5TY-01A	no	46	astrocytoma	grade III	Glioblastoma, IDH-wildtype. Grade 4.
CL	184	TCGA-28-1747	TCGA-28-1747-01C	no	44	glioblastoma	grade IV	Glioblastoma, IDH-wildtype. Grade 4.
CL	185	TCGA-VW-A8FI	TCGA-VW-A8FI-01A	no	66	astrocytoma	grade III	Glioblastoma, IDH-wildtype. Grade 4.
CL	186	TCGA-06-5859	TCGA-06-5859-01A	no	63	glioblastoma	grade IV	Glioblastoma, IDH-wildtype. Grade 4.
CL	187	TCGA-28-5220	TCGA-28-5220-01A	no	67	glioblastoma	grade IV	Glioblastoma, IDH-wildtype. Grade 4.
CL	188	TCGA-06-0158	TCGA-06-0158-01A	no	73	glioblastoma	grade IV	Glioblastoma, IDH-wildtype. Grade 4.
CL	189	TCGA-DU-A7TJ	TCGA-DU-A7TJ-01A	no	55	astrocytoma	grade III	Glioblastoma, IDH-wildtype. Grade 4.
CL	190	TCGA-DU-6405	TCGA-DU-6405-01A	no	51	astrocytoma	grade III	Glioblastoma, IDH-wildtype. Grade 4.
CL	191	TCGA-CS-6188	TCGA-CS-6188-01A	no	48	astrocytoma	grade III	Glioblastoma, IDH-wildtype. Grade 4.
CL	192	TCGA-HT-A5RC	TCGA-HT-A5RC-01A	no	70	astrocytoma	grade III	Glioblastoma, IDH-wildtype. Grade 4.
CL	193	TCGA-06-0125	TCGA-06-0125-01A	yes	63	glioblastoma	grade IV	Glioblastoma, IDH-wildtype. Grade 4.
CL	194	TCGA-06-2565	TCGA-06-2565-01A	no	59	glioblastoma	grade IV	Glioblastoma, IDH-wildtype. Grade 4.
CL	195	TCGA-06-0747	TCGA-06-0747-01A	no	53	glioblastoma	grade IV	Glioblastoma, IDH-wildtype. Grade 4.
CL	196	TCGA-FG-6692	TCGA-FG-6692-01A	no	63	oligodendroglioma	grade III	Glioblastoma, IDH-wildtype. Grade 4.
CL	197	TCGA-HT-A5RA	TCGA-HT-A5RA-01A	no	65	astrocytoma	grade III	Glioblastoma, IDH-wildtype. Grade 4.
CL	198	TCGA-06-2564	TCGA-06-2564-01A	no	50	glioblastoma	grade IV	Glioblastoma, IDH-wildtype. Grade 4.
CL	199	TCGA-76-4926	TCGA-76-4926-01B	no	68	glioblastoma	grade IV	Glioblastoma, IDH-wildtype. Grade 4.
CL	200	TCGA-19-2619	TCGA-19-2619-01A	no	55	glioblastoma	grade IV	Glioblastoma, IDH-wildtype. Grade 4.
CL	201	TCGA-28-5209	TCGA-28-5209-01A	no	66	glioblastoma	grade IV	Glioblastoma, IDH-wildtype. Grade 4.
CL	202	TCGA-27-2528	TCGA-27-2528-01A	no	62	glioblastoma	grade IV	Glioblastoma, IDH-wildtype. Grade 4.
CL	203	TCGA-28-5204	TCGA-28-5204-01A	no	72	glioblastoma	grade IV	Glioblastoma, IDH-wildtype. Grade 4.
CL	204	TCGA-QH-A6CV	TCGA-QH-A6CV-01A	no	51	oligoastrocytoma	grade III	Glioblastoma, IDH-wildtype. Grade 4.
CL	205	TCGA-S9-A6WM	TCGA-S9-A6WM-01A	no	59	astrocytoma	grade III	Glioblastoma, IDH-wildtype. Grade 4.
CL	206	TCGA-TM-A7C3	TCGA-TM-A7C3-01A	no	43	astrocytoma	grade III	Glioblastoma, IDH-wildtype. Grade 4.
CL	207	TCGA-27-1835	TCGA-27-1835-01A	no	53	glioblastoma	grade IV	Glioblastoma, IDH-wildtype. Grade 4.
CL	208	TCGA-CS-6186	TCGA-CS-6186-01A	no	58	oligoastrocytoma	grade III	Glioblastoma, IDH-wildtype. Grade 4.
CL	209	TCGA-14-0790	TCGA-14-0790-01B	no	64	glioblastoma	grade IV	Glioblastoma, IDH-wildtype. Grade 4.
CL	210	TCGA-DU-6406	TCGA-DU-6406-01A	no	59	oligoastrocytoma	grade III	Glioblastoma, IDH-wildtype. Grade 4.
CL	211	TCGA-KT-A7W1	TCGA-KT-A7W1-01A	no	45	astrocytoma	grade III	Glioblastoma, IDH-wildtype. Grade 4.
CL	212	TCGA-06-0211	TCGA-06-0211-01B	yes	47	glioblastoma	grade IV	Glioblastoma, IDH-wildtype. Grade 4.
CL	213	TCGA-06-2563	TCGA-06-2563-01A	no	72	glioblastoma	grade IV	Glioblastoma, IDH-wildtype. Grade 4.
CL	214	TCGA-12-3653	TCGA-12-3653-01A	no	34	glioblastoma	grade IV	Glioblastoma, IDH-wildtype. Grade 4.
CL	215	TCGA-76-4931	TCGA-76-4931-01A	no	70	glioblastoma	grade IV	Glioblastoma, IDH-wildtype. Grade 4.
CL	216	TCGA-06-0744	TCGA-06-0744-01A	no	66	glioblastoma	grade IV	Glioblastoma, IDH-wildtype. Grade 4.
CL	217	TCGA-27-2523	TCGA-27-2523-01A	no	63	glioblastoma	grade IV	Glioblastoma, IDH-wildtype. Grade 4.
CL	218	TCGA-15-0742	TCGA-15-0742-01A	no	65	glioblastoma	grade IV	Glioblastoma, IDH-wildtype. Grade 4.
CL	219	TCGA-06-0152	TCGA-06-0152-02A	no	68	glioblastoma	grade IV	Glioblastoma, IDH-wildtype. Grade 4.
CL	220	TCGA-32-2638	TCGA-32-2638-01A	no	67	glioblastoma	grade IV	Glioblastoma, IDH-wildtype. Grade 4.
CL	221	TCGA-FG-A4MU	TCGA-FG-A4MU-01B	no	58	oligoastrocytoma	grade III	Glioblastoma, IDH-wildtype. Grade 4.
CL	222	TCGA-06-5414	TCGA-06-5414-01A	no	61	glioblastoma	grade IV	Glioblastoma, IDH-wildtype. Grade 4.
CL	223	TCGA-32-2632	TCGA-32-2632-01A	no	80	glioblastoma	grade IV	Glioblastoma, IDH-wildtype. Grade 4.
CL	224	TCGA-32-2616	TCGA-32-2616-01A	no	48	glioblastoma	grade IV	Glioblastoma, IDH-wildtype. Grade 4.
CL	225	TCGA-76-4925	TCGA-76-4925-01A	no	76	glioblastoma	grade IV	Glioblastoma, IDH-wildtype. Grade 4.
CL	226	TCGA-76-4932	TCGA-76-4932-01A	no	50	glioblastoma	grade IV	Glioblastoma, IDH-wildtype. Grade 4.
CL	227	TCGA-14-1034	TCGA-14-1034-02B	yes	60	glioblastoma	grade IV	Glioblastoma, IDH-wildtype. Grade 4.
CL	228	TCGA-06-0743	TCGA-06-0743-01A	no	69	glioblastoma	grade IV	Glioblastoma, IDH-wildtype. Grade 4.
CL	229	TCGA-41-2572	TCGA-41-2572-01A	no	67	glioblastoma	grade IV	Glioblastoma, IDH-wildtype. Grade 4.
CL	230	TCGA-28-2499	TCGA-28-2499-01A	no	59	glioblastoma	grade IV	Glioblastoma, IDH-wildtype. Grade 4.
CL	231	TCGA-27-2526	TCGA-27-2526-01A	no	79	glioblastoma	grade IV	Glioblastoma, IDH-wildtype. Grade 4.
CL	232	TCGA-12-3652	TCGA-12-3652-01A	no	60	glioblastoma	grade IV	Glioblastoma, IDH-wildtype. Grade 4.
