# Supplementary material for: Reclassification of TCGA Diffuse Glioma Profiles Linked to Transcriptomic, Epigenetic, Genomic and Clinical Data, According to the 2021 WHO CNS Tumor Classification
Source: Int J Mol Sci. 2022 Dec 21;24(1):157. doi: 10.3390/ijms24010157 (PMC9820617; doi:10.3390/ijms24010157)
Supplement: Supplementary file 1 [file ijms-24-00157-s001.zip › ijms-2057006_Table S6.xlsx]

## Sheet: TCGA groups_HR
Group_Name	Group_Grade	Reference_Group_Name	Reference_Group_Grade	HR (Lower 95% CI - Higher 95% CI)	p-value
Astrocytoma	Grade III	Astrocytoma	Grade II	5.2 (1.6-17)	0.00666
Glioblastoma	Grade IV	Astrocytoma	Grade II	20 (6.3-61)	2.82e-07
Oligoastrocytoma	Grade II	Astrocytoma	Grade II	1.5 (0.39-5.9)	0.543
Oligoastrocytoma	Grade III	Astrocytoma	Grade II	3.7 (1-13)	0.0455
Oligodendroglioma	Grade II	Astrocytoma	Grade II	1.4 (0.39-5)	0.601
Oligodendroglioma	Grade III	Astrocytoma	Grade II	3.4 (0.99-12)	0.0514
Astrocytoma	Grade II	Astrocytoma	Grade III	0.19 (0.059-0.63)	0.00666
Glioblastoma	Grade IV	Astrocytoma	Grade III	3.8 (2.6-5.5)	2.2e-12
Oligoastrocytoma	Grade II	Astrocytoma	Grade III	0.29 (0.13-0.67)	0.00359
Oligoastrocytoma	Grade III	Astrocytoma	Grade III	0.71 (0.36-1.4)	0.334
Oligodendroglioma	Grade II	Astrocytoma	Grade III	0.27 (0.14-0.53)	0.000146
Oligodendroglioma	Grade III	Astrocytoma	Grade III	0.66 (0.36-1.2)	0.166
Astrocytoma	Grade II	Glioblastoma	Grade IV	0.051 (0.016-0.16)	2.82e-07
Astrocytoma	Grade III	Glioblastoma	Grade IV	0.26 (0.18-0.38)	2.2e-12
Oligoastrocytoma	Grade II	Glioblastoma	Grade IV	0.078 (0.037-0.16)	2.4e-11
Oligoastrocytoma	Grade III	Glioblastoma	Grade IV	0.19 (0.1-0.34)	4.49e-08
Oligodendroglioma	Grade II	Glioblastoma	Grade IV	0.071 (0.04-0.13)	8.99e-19
Oligodendroglioma	Grade III	Glioblastoma	Grade IV	0.17 (0.11-0.28)	2.51e-12
Astrocytoma	Grade II	Oligoastrocytoma	Grade II	0.66 (0.17-2.5)	0.543
Astrocytoma	Grade III	Oligoastrocytoma	Grade II	3.4 (1.5-7.8)	0.00359
Glioblastoma	Grade IV	Oligoastrocytoma	Grade II	13 (6.1-27)	2.4e-11
Oligoastrocytoma	Grade III	Oligoastrocytoma	Grade II	2.4 (0.94-6.3)	0.0685
Oligodendroglioma	Grade II	Oligoastrocytoma	Grade II	0.92 (0.36-2.3)	0.864
Oligodendroglioma	Grade III	Oligoastrocytoma	Grade II	2.2 (0.92-5.4)	0.0741
Astrocytoma	Grade II	Oligoastrocytoma	Grade III	0.27 (0.076-0.97)	0.0455
Astrocytoma	Grade III	Oligoastrocytoma	Grade III	1.4 (0.7-2.8)	0.334
Glioblastoma	Grade IV	Oligoastrocytoma	Grade III	5.3 (2.9-9.7)	4.49e-08
Oligoastrocytoma	Grade II	Oligoastrocytoma	Grade III	0.41 (0.16-1.1)	0.0685
Oligodendroglioma	Grade II	Oligoastrocytoma	Grade III	0.38 (0.17-0.87)	0.0218
Oligodendroglioma	Grade III	Oligoastrocytoma	Grade III	0.92 (0.43-2)	0.836
Astrocytoma	Grade II	Oligodendroglioma	Grade II	0.71 (0.2-2.5)	0.601
Astrocytoma	Grade III	Oligodendroglioma	Grade II	3.7 (1.9-7.2)	0.000146
Glioblastoma	Grade IV	Oligodendroglioma	Grade II	14 (7.8-25)	8.99e-19
Oligoastrocytoma	Grade II	Oligodendroglioma	Grade II	1.1 (0.43-2.8)	0.864
Oligoastrocytoma	Grade III	Oligodendroglioma	Grade II	2.6 (1.2-6)	0.0218
Oligodendroglioma	Grade III	Oligodendroglioma	Grade II	2.4 (1.2-5.1)	0.0193
Astrocytoma	Grade II	Oligodendroglioma	Grade III	0.29 (0.086-1)	0.0514
Astrocytoma	Grade III	Oligodendroglioma	Grade III	1.5 (0.84-2.8)	0.166
Glioblastoma	Grade IV	Oligodendroglioma	Grade III	5.8 (3.5-9.4)	2.51e-12
Oligoastrocytoma	Grade II	Oligodendroglioma	Grade III	0.45 (0.19-1.1)	0.0741
Oligoastrocytoma	Grade III	Oligodendroglioma	Grade III	1.1 (0.51-2.3)	0.836
Oligodendroglioma	Grade II	Oligodendroglioma	Grade III	0.41 (0.2-0.87)	0.0193

## Sheet: WHO CNS5 groups_HR
Group_Name	Group_Grade	Reference_Group_Name	Reference_Group_Grade	HR (Lower 95% CI - Higher 95% CI)	p-value
Astrocytoma, IDH-mutant	Grade 2	Oligodendroglioma, IDH-mutant, 1p/19q-codeleted	Grade 2	2.4 (0.79-7.3)	0.122
Astrocytoma, IDH-mutant	Grade 3	Oligodendroglioma, IDH-mutant, 1p/19q-codeleted	Grade 2	3.7 (1.2-11)	0.0197
Astrocytoma, IDH-mutant	Grade 4	Oligodendroglioma, IDH-mutant, 1p/19q-codeleted	Grade 2	9.8 (3.4-29)	2.85e-05
Glioblastoma, IDH-wildtype	Grade 4	Oligodendroglioma, IDH-mutant, 1p/19q-codeleted	Grade 2	30 (11-82)	1.47e-11
Oligodendroglioma, IDH-mutant, 1p/19q-codeleted	Grade 3	Oligodendroglioma, IDH-mutant, 1p/19q-codeleted	Grade 2	4.1 (1.3-13)	0.0136
Astrocytoma, IDH-mutant	Grade 2	Oligodendroglioma, IDH-mutant, 1p/19q-codeleted	Grade 3	0.59 (0.28-1.2)	0.165
Astrocytoma, IDH-mutant	Grade 3	Oligodendroglioma, IDH-mutant, 1p/19q-codeleted	Grade 3	0.9 (0.43-1.9)	0.777
Astrocytoma, IDH-mutant	Grade 4	Oligodendroglioma, IDH-mutant, 1p/19q-codeleted	Grade 3	2.4 (1.2-4.8)	0.0133
Glioblastoma, IDH-wildtype	Grade 4	Oligodendroglioma, IDH-mutant, 1p/19q-codeleted	Grade 3	7.4 (4.2-13)	2.98e-12
Oligodendroglioma, IDH-mutant, 1p/19q-codeleted	Grade 2	Oligodendroglioma, IDH-mutant, 1p/19q-codeleted	Grade 3	0.24 (0.079-0.75)	0.0136
Astrocytoma, IDH-mutant	Grade 2	Glioblastoma, IDH-wildtype	Grade 4	0.079 (0.046-0.14)	6.13e-20
Astrocytoma, IDH-mutant	Grade 3	Glioblastoma, IDH-wildtype	Grade 4	0.12 (0.073-0.2)	5.93e-16
Astrocytoma, IDH-mutant	Grade 4	Glioblastoma, IDH-wildtype	Grade 4	0.32 (0.21-0.51)	9.62e-07
Oligodendroglioma, IDH-mutant, 1p/19q-codeleted	Grade 2	Glioblastoma, IDH-wildtype	Grade 4	0.033 (0.012-0.089)	1.47e-11
Oligodendroglioma, IDH-mutant, 1p/19q-codeleted	Grade 3	Glioblastoma, IDH-wildtype	Grade 4	0.13 (0.077-0.24)	2.98e-12
Astrocytoma, IDH-mutant	Grade 3	Astrocytoma, IDH-mutant	Grade 2	1.5 (0.75-3.2)	0.241
Astrocytoma, IDH-mutant	Grade 4	Astrocytoma, IDH-mutant	Grade 2	4.1 (2.1-8.1)	4.49e-05
Glioblastoma, IDH-wildtype	Grade 4	Astrocytoma, IDH-mutant	Grade 2	13 (7.4-22)	6.13e-20
Oligodendroglioma, IDH-mutant, 1p/19q-codeleted	Grade 2	Astrocytoma, IDH-mutant	Grade 2	0.42 (0.14-1.3)	0.122
Oligodendroglioma, IDH-mutant, 1p/19q-codeleted	Grade 3	Astrocytoma, IDH-mutant	Grade 2	1.7 (0.8-3.6)	0.165
Astrocytoma, IDH-mutant	Grade 2	Astrocytoma, IDH-mutant	Grade 3	0.65 (0.32-1.3)	0.241
Astrocytoma, IDH-mutant	Grade 4	Astrocytoma, IDH-mutant	Grade 3	2.7 (1.4-5.1)	0.00315
Glioblastoma, IDH-wildtype	Grade 4	Astrocytoma, IDH-mutant	Grade 3	8.3 (4.9-14)	5.93e-16
Oligodendroglioma, IDH-mutant, 1p/19q-codeleted	Grade 2	Astrocytoma, IDH-mutant	Grade 3	0.27 (0.09-0.81)	0.0197
Oligodendroglioma, IDH-mutant, 1p/19q-codeleted	Grade 3	Astrocytoma, IDH-mutant	Grade 3	1.1 (0.53-2.3)	0.777
Astrocytoma, IDH-mutant	Grade 2	Astrocytoma, IDH-mutant	Grade 4	0.24 (0.12-0.48)	4.49e-05
Astrocytoma, IDH-mutant	Grade 3	Astrocytoma, IDH-mutant	Grade 4	0.37 (0.2-0.72)	0.00315
Glioblastoma, IDH-wildtype	Grade 4	Astrocytoma, IDH-mutant	Grade 4	3.1 (2-4.9)	9.62e-07
Oligodendroglioma, IDH-mutant, 1p/19q-codeleted	Grade 2	Astrocytoma, IDH-mutant	Grade 4	0.1 (0.035-0.3)	2.85e-05
Oligodendroglioma, IDH-mutant, 1p/19q-codeleted	Grade 3	Astrocytoma, IDH-mutant	Grade 4	0.42 (0.21-0.83)	0.0133
