# Supplementary material for: Reclassification of TCGA Diffuse Glioma Profiles Linked to Transcriptomic, Epigenetic, Genomic and Clinical Data, According to the 2021 WHO CNS Tumor Classification
Source: Int J Mol Sci. 2022 Dec 21;24(1):157. doi: 10.3390/ijms24010157 (PMC9820617; doi:10.3390/ijms24010157)
Supplement: Supplementary file 1 [file ijms-24-00157-s001.zip › ijms-2057006_Table S7.xlsx]

## Sheet: TCGA groups
Diagnostic marker	Comparison	AUC_ROC	P_VALUE
CRNDE	Glioblastoma_Grade_IV_vs_Oligoastrocytoma_Grade_II_III	0.852	7.67e-40
CRNDE	Astrocytoma_Grade_II_III_vs_Oligoastrocytoma_Grade_II_III	0.698	1.36e-15
CRNDE	Oligoastrocytoma_Grade_II_III_vs_Oligodendroglioma_Grade_II_III	0.599	0.000171
CRNDE	Glioblastoma_Grade_IV_vs_Astrocytoma_Grade_II_III	0.695	3.43e-18
CRNDE	Glioblastoma_Grade_IV_vs_Oligodendroglioma_Grade_II_III	0.868	9.87e-54
CRNDE	Astrocytoma_Grade_II_III_vs_Oligodendroglioma_Grade_II_III	0.753	2.41e-25
FREM2	Glioblastoma_Grade_IV_vs_Oligoastrocytoma_Grade_II_III	0.711	0.00671
FREM2	Astrocytoma_Grade_II_III_vs_Oligoastrocytoma_Grade_II_III	0.554	5.6e-10
FREM2	Oligoastrocytoma_Grade_II_III_vs_Oligodendroglioma_Grade_II_III	0.509	3.5e-60
FREM2	Glioblastoma_Grade_IV_vs_Astrocytoma_Grade_II_III	0.647	0.00332
FREM2	Glioblastoma_Grade_IV_vs_Oligodendroglioma_Grade_II_III	0.708	0.743
FREM2	Astrocytoma_Grade_II_III_vs_Oligodendroglioma_Grade_II_III	0.557	4.1e-12
SPRY1	Glioblastoma_Grade_IV_vs_Oligoastrocytoma_Grade_II_III	0.906	6.58e-51
SPRY1	Astrocytoma_Grade_II_III_vs_Oligoastrocytoma_Grade_II_III	0.568	0.000119
SPRY1	Oligoastrocytoma_Grade_II_III_vs_Oligodendroglioma_Grade_II_III	0.533	5.68e-42
SPRY1	Glioblastoma_Grade_IV_vs_Astrocytoma_Grade_II_III	0.837	5.35e-51
SPRY1	Glioblastoma_Grade_IV_vs_Oligodendroglioma_Grade_II_III	0.921	1.09e-76
SPRY1	Astrocytoma_Grade_II_III_vs_Oligodendroglioma_Grade_II_III	0.548	0.971
FREM2_pathway_variant_1	Glioblastoma_Grade_IV_vs_Oligoastrocytoma_Grade_II_III	0.865	4.16e-57
FREM2_pathway_variant_1	Astrocytoma_Grade_II_III_vs_Oligoastrocytoma_Grade_II_III	0.604	9.36e-07
FREM2_pathway_variant_1	Oligoastrocytoma_Grade_II_III_vs_Oligodendroglioma_Grade_II_III	0.694	0.266
FREM2_pathway_variant_1	Glioblastoma_Grade_IV_vs_Astrocytoma_Grade_II_III	0.788	7.79e-68
FREM2_pathway_variant_1	Glioblastoma_Grade_IV_vs_Oligodendroglioma_Grade_II_III	0.939	2.8e-78
FREM2_pathway_variant_1	Astrocytoma_Grade_II_III_vs_Oligodendroglioma_Grade_II_III	0.786	3.76e-32
FREM2_pathway_variant_2	Glioblastoma_Grade_IV_vs_Oligoastrocytoma_Grade_II_III	0.854	4.16e-57
FREM2_pathway_variant_2	Astrocytoma_Grade_II_III_vs_Oligoastrocytoma_Grade_II_III	0.609	1.79e-09
FREM2_pathway_variant_2	Oligoastrocytoma_Grade_II_III_vs_Oligodendroglioma_Grade_II_III	0.698	0.389
FREM2_pathway_variant_2	Glioblastoma_Grade_IV_vs_Astrocytoma_Grade_II_III	0.771	1.84e-70
FREM2_pathway_variant_2	Glioblastoma_Grade_IV_vs_Oligodendroglioma_Grade_II_III	0.938	3.07e-79
FREM2_pathway_variant_2	Astrocytoma_Grade_II_III_vs_Oligodendroglioma_Grade_II_III	0.791	1.12e-37
FREM2_pathway_variant_3	Glioblastoma_Grade_IV_vs_Oligoastrocytoma_Grade_II_III	0.773	4.16e-57
FREM2_pathway_variant_3	Astrocytoma_Grade_II_III_vs_Oligoastrocytoma_Grade_II_III	0.589	0.000239
FREM2_pathway_variant_3	Oligoastrocytoma_Grade_II_III_vs_Oligodendroglioma_Grade_II_III	0.693	0.599
FREM2_pathway_variant_3	Glioblastoma_Grade_IV_vs_Astrocytoma_Grade_II_III	0.7	5.24e-75
FREM2_pathway_variant_3	Glioblastoma_Grade_IV_vs_Oligodendroglioma_Grade_II_III	0.889	3.07e-79
FREM2_pathway_variant_3	Astrocytoma_Grade_II_III_vs_Oligodendroglioma_Grade_II_III	0.779	3.44e-27

## Sheet: WHO CNS5 groups
Diagnostic marker	Comparison	AUC_ROC	P_VALUE
CRNDE	Astrocytoma_IDH_mut_Grade_2_3_vs_Oligodendroglioma_IDH_mut_1p_19q_codeleted_Grade_2_3	0.764	8.14e-31
CRNDE	Astrocytoma_IDH_mut_Grade_4_vs_Oligodendroglioma_IDH_mut_1p_19q_codeleted_Grade_2_3	0.971	3.86e-60
CRNDE	Glioblastoma_Grade_4_vs_Oligodendroglioma_IDH_mut_1p_19q_codeleted_Grade_2_3	0.934	6.06e-45
CRNDE	Glioblastoma_Grade_4_vs_Astrocytoma_IDH_mut_Grade_2_3	0.863	6.76e-15
CRNDE	Glioblastoma_Grade_4_vs_Astrocytoma_IDH_mut_Grade_4	0.556	3.08e-05
CRNDE	Astrocytoma_IDH_mut_Grade_4_vs_Astrocytoma_IDH_mut_Grade_2_3	0.906	4.95e-74
FREM2	Astrocytoma_IDH_mut_Grade_2_3_vs_Oligodendroglioma_IDH_mut_1p_19q_codeleted_Grade_2_3	0.501	2.04e-15
FREM2	Astrocytoma_IDH_mut_Grade_4_vs_Oligodendroglioma_IDH_mut_1p_19q_codeleted_Grade_2_3	0.712	3.15e-28
FREM2	Glioblastoma_Grade_4_vs_Oligodendroglioma_IDH_mut_1p_19q_codeleted_Grade_2_3	0.829	0.0452
FREM2	Glioblastoma_Grade_4_vs_Astrocytoma_IDH_mut_Grade_2_3	0.855	0.00016
FREM2	Glioblastoma_Grade_4_vs_Astrocytoma_IDH_mut_Grade_4	0.642	5.69e-23
FREM2	Astrocytoma_IDH_mut_Grade_4_vs_Astrocytoma_IDH_mut_Grade_2_3	0.724	1.12e-46
SPRY1	Astrocytoma_IDH_mut_Grade_2_3_vs_Oligodendroglioma_IDH_mut_1p_19q_codeleted_Grade_2_3	0.593	2.94e-62
SPRY1	Astrocytoma_IDH_mut_Grade_4_vs_Oligodendroglioma_IDH_mut_1p_19q_codeleted_Grade_2_3	0.688	1.46e-35
SPRY1	Glioblastoma_Grade_4_vs_Oligodendroglioma_IDH_mut_1p_19q_codeleted_Grade_2_3	0.953	3.1e-74
SPRY1	Glioblastoma_Grade_4_vs_Astrocytoma_IDH_mut_Grade_2_3	0.959	2.82e-91
SPRY1	Glioblastoma_Grade_4_vs_Astrocytoma_IDH_mut_Grade_4	0.844	1.53e-25
SPRY1	Astrocytoma_IDH_mut_Grade_4_vs_Astrocytoma_IDH_mut_Grade_2_3	0.745	3.09e-59
FREM2_pathway_variant_1	Astrocytoma_IDH_mut_Grade_2_3_vs_Oligodendroglioma_IDH_mut_1p_19q_codeleted_Grade_2_3	0.811	7.9e-45
FREM2_pathway_variant_1	Astrocytoma_IDH_mut_Grade_4_vs_Oligodendroglioma_IDH_mut_1p_19q_codeleted_Grade_2_3	0.9	1.63e-52
FREM2_pathway_variant_1	Glioblastoma_Grade_4_vs_Oligodendroglioma_IDH_mut_1p_19q_codeleted_Grade_2_3	0.942	2.28e-74
FREM2_pathway_variant_1	Glioblastoma_Grade_4_vs_Astrocytoma_IDH_mut_Grade_2_3	0.807	4.51e-61
FREM2_pathway_variant_1	Glioblastoma_Grade_4_vs_Astrocytoma_IDH_mut_Grade_4	0.75	0.000894
FREM2_pathway_variant_1	Astrocytoma_IDH_mut_Grade_4_vs_Astrocytoma_IDH_mut_Grade_2_3	0.632	1.41e-43
FREM2_pathway_variant_2	Astrocytoma_IDH_mut_Grade_2_3_vs_Oligodendroglioma_IDH_mut_1p_19q_codeleted_Grade_2_3	0.825	3.09e-53
FREM2_pathway_variant_2	Astrocytoma_IDH_mut_Grade_4_vs_Oligodendroglioma_IDH_mut_1p_19q_codeleted_Grade_2_3	0.909	1.63e-52
FREM2_pathway_variant_2	Glioblastoma_Grade_4_vs_Oligodendroglioma_IDH_mut_1p_19q_codeleted_Grade_2_3	0.946	2.28e-74
FREM2_pathway_variant_2	Glioblastoma_Grade_4_vs_Astrocytoma_IDH_mut_Grade_2_3	0.799	5.06e-50
FREM2_pathway_variant_2	Glioblastoma_Grade_4_vs_Astrocytoma_IDH_mut_Grade_4	0.751	0.948
FREM2_pathway_variant_2	Astrocytoma_IDH_mut_Grade_4_vs_Astrocytoma_IDH_mut_Grade_2_3	0.622	1.37e-36
FREM2_pathway_variant_3	Astrocytoma_IDH_mut_Grade_2_3_vs_Oligodendroglioma_IDH_mut_1p_19q_codeleted_Grade_2_3	0.832	2.86e-42
FREM2_pathway_variant_3	Astrocytoma_IDH_mut_Grade_4_vs_Oligodendroglioma_IDH_mut_1p_19q_codeleted_Grade_2_3	0.908	3.74e-54
FREM2_pathway_variant_3	Glioblastoma_Grade_4_vs_Oligodendroglioma_IDH_mut_1p_19q_codeleted_Grade_2_3	0.922	3.51e-64
FREM2_pathway_variant_3	Glioblastoma_Grade_4_vs_Astrocytoma_IDH_mut_Grade_2_3	0.733	3.62e-18
FREM2_pathway_variant_3	Glioblastoma_Grade_4_vs_Astrocytoma_IDH_mut_Grade_4	0.67	0.232
FREM2_pathway_variant_3	Astrocytoma_IDH_mut_Grade_4_vs_Astrocytoma_IDH_mut_Grade_2_3	0.617	2.66e-42
